# Supplementary material
Source: Elsevier journal article supplement (http://orbi.ulg.ac.be/bitstream/2268/174279/2/mmc1.pdf)

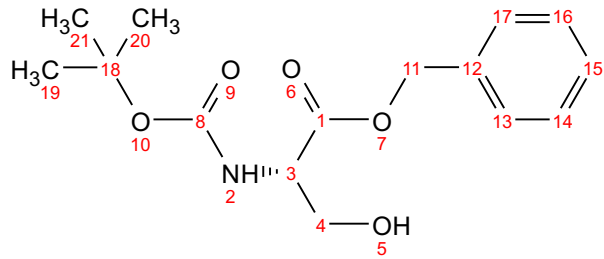

12

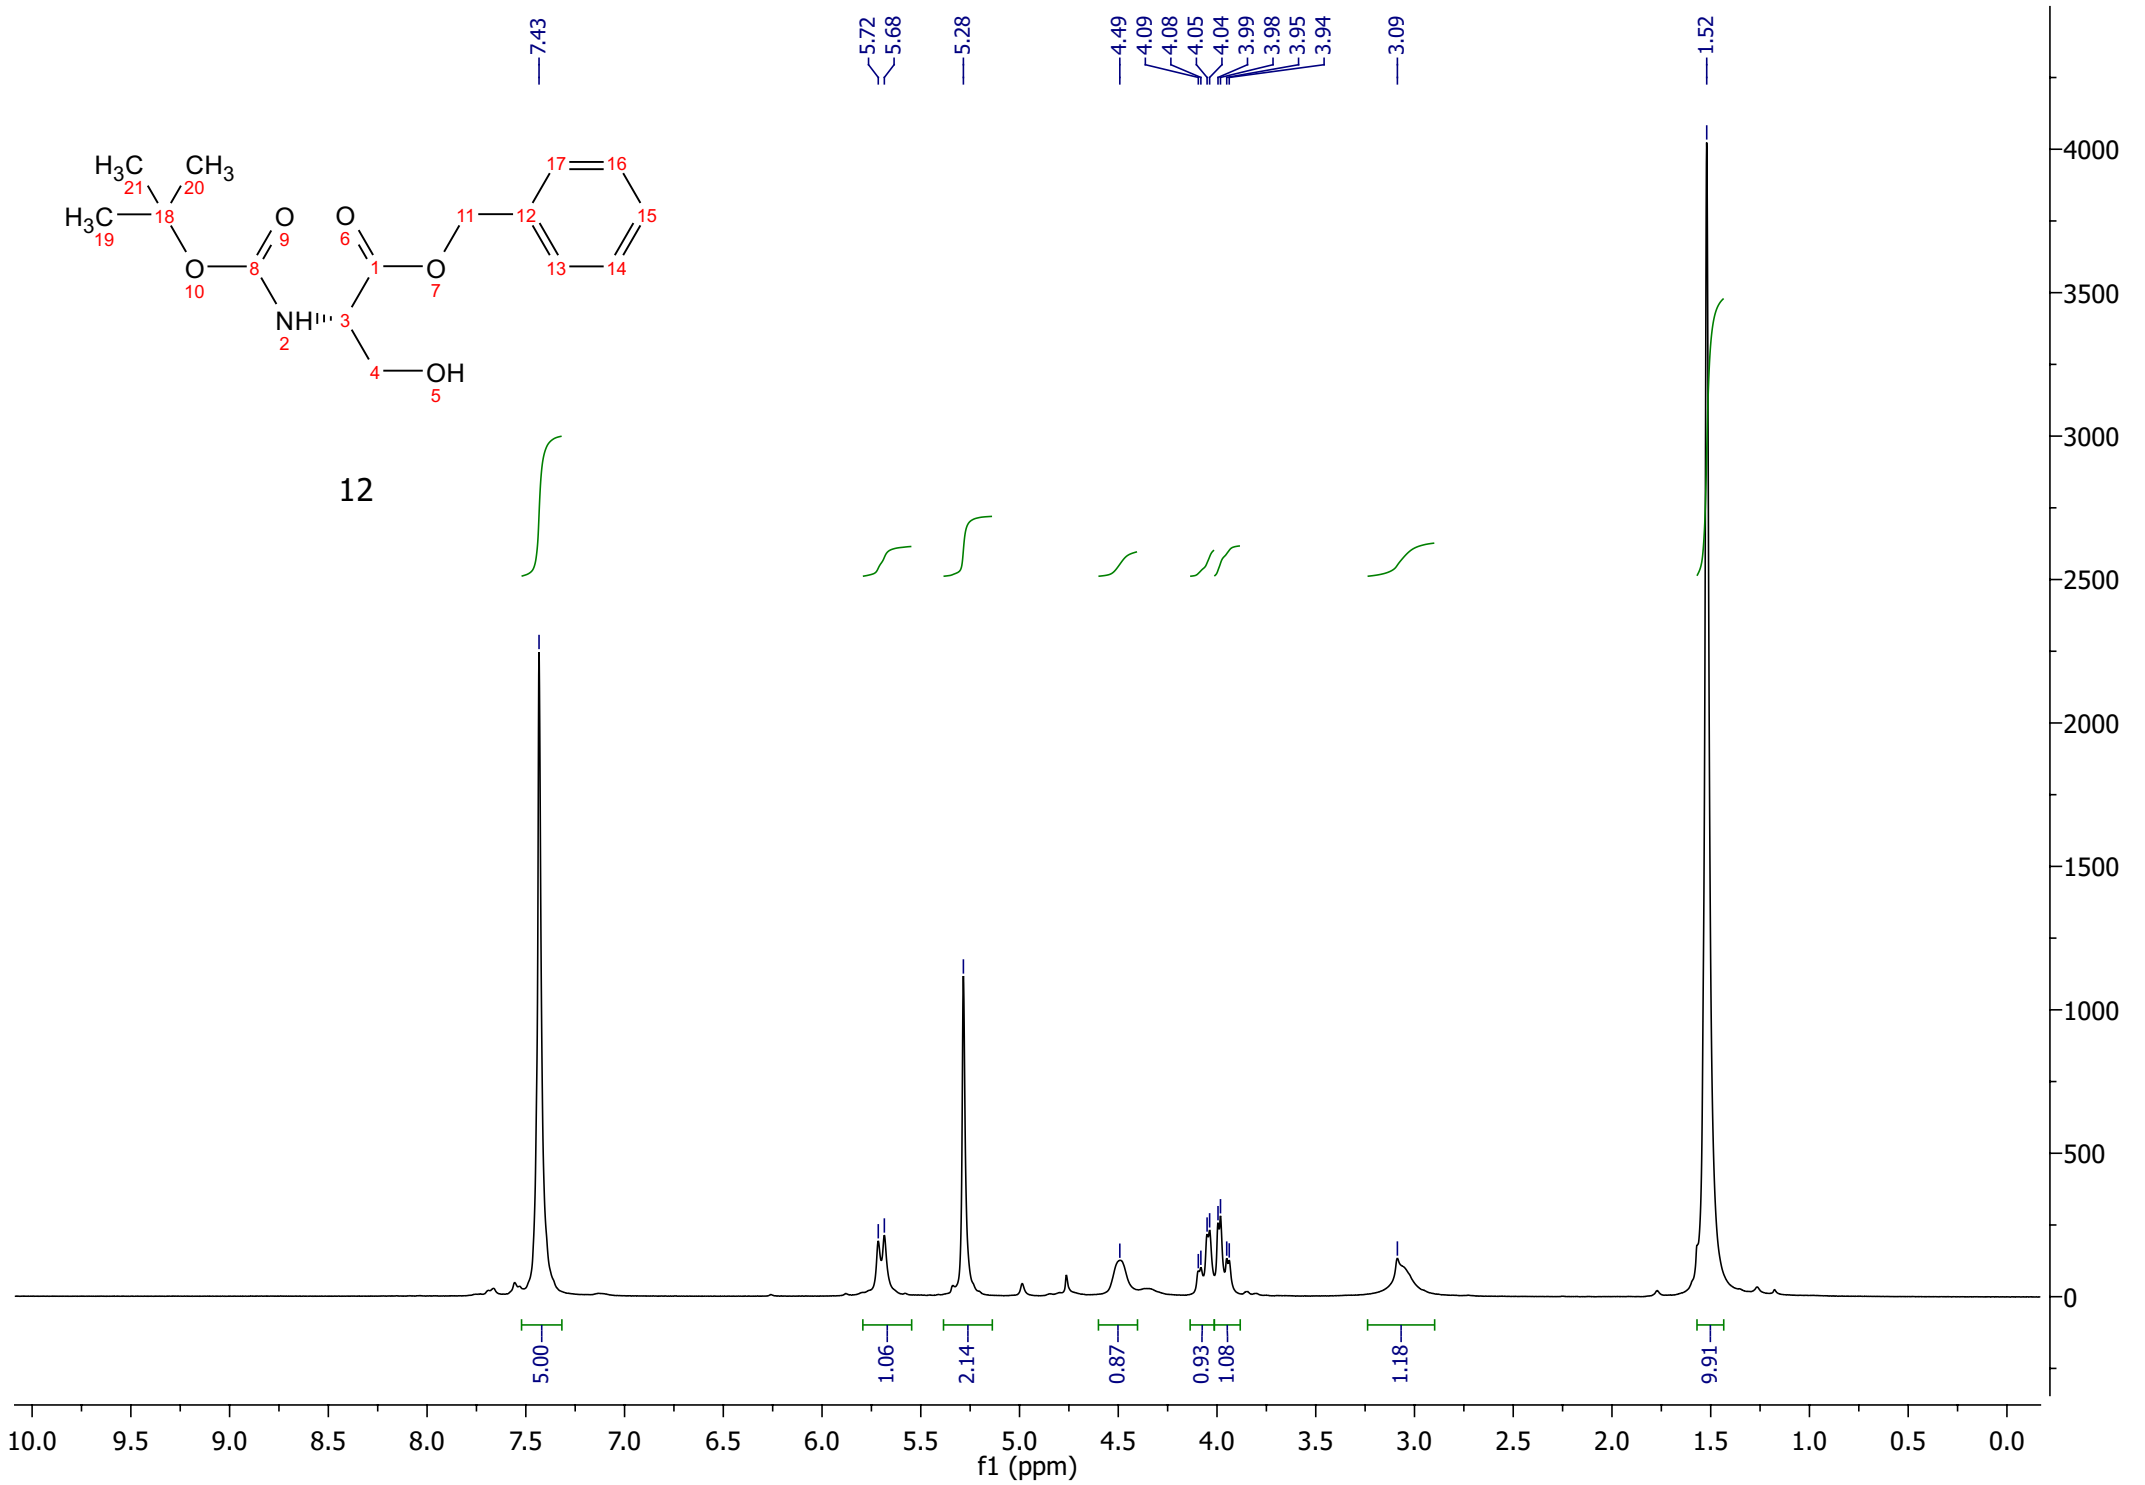

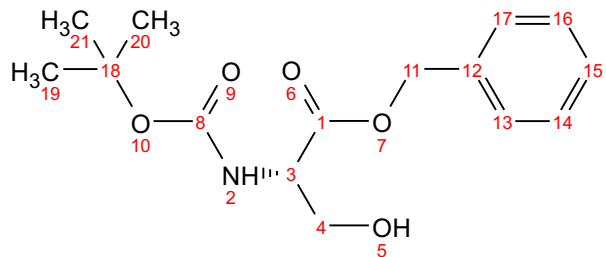

12

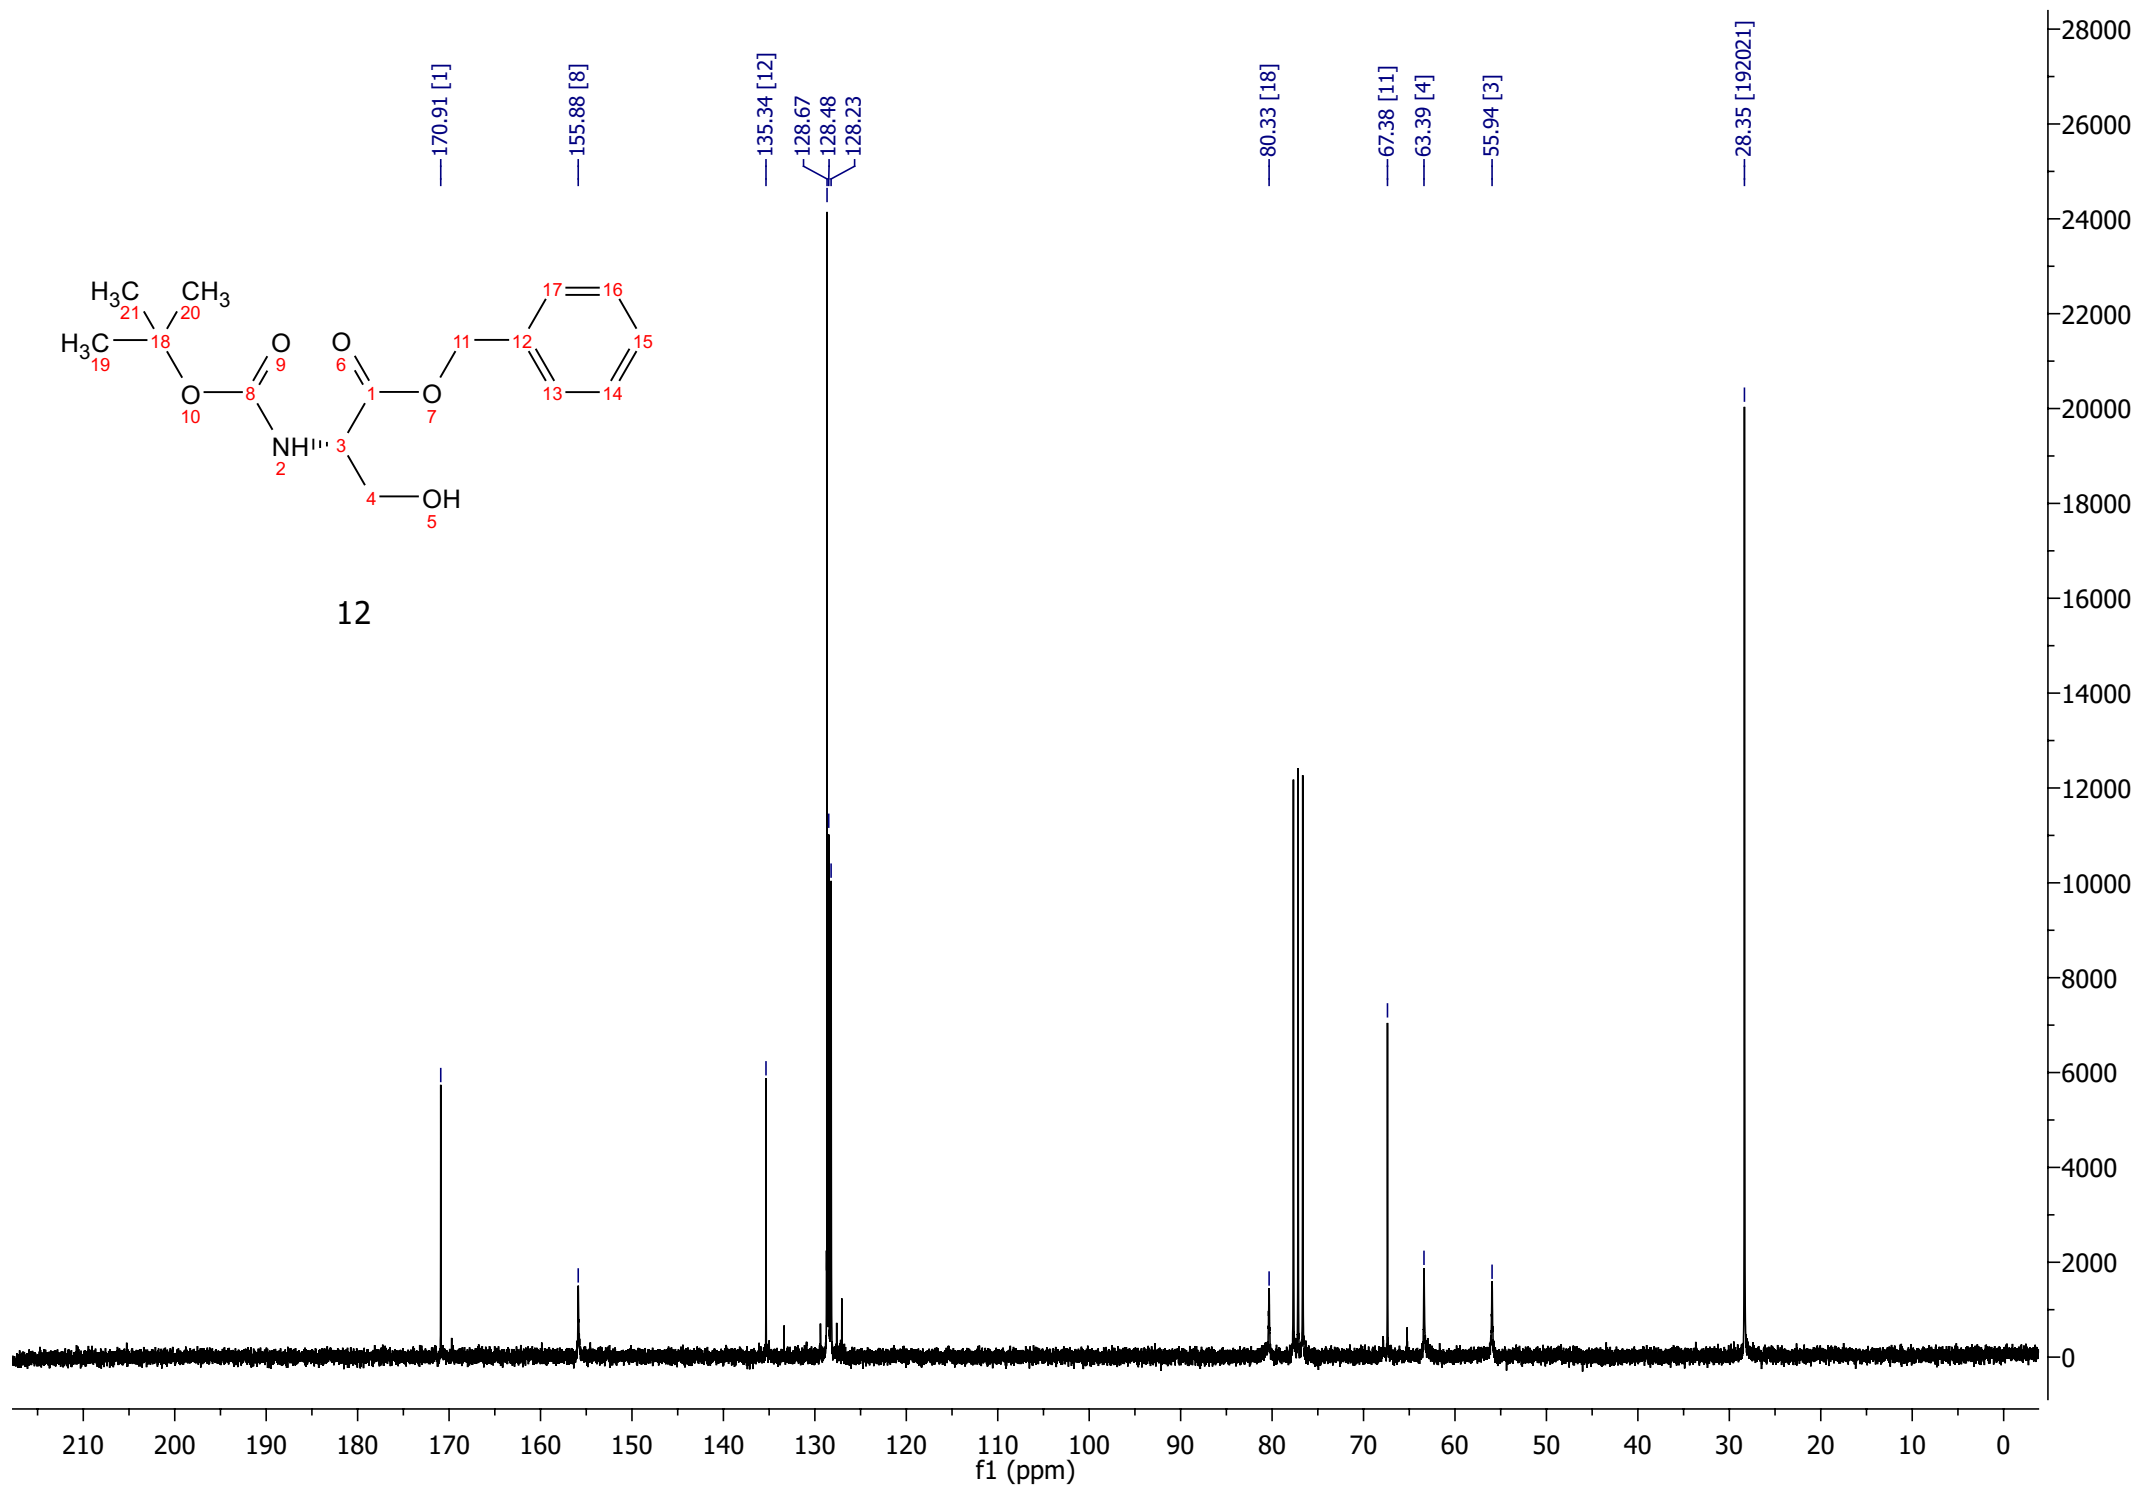



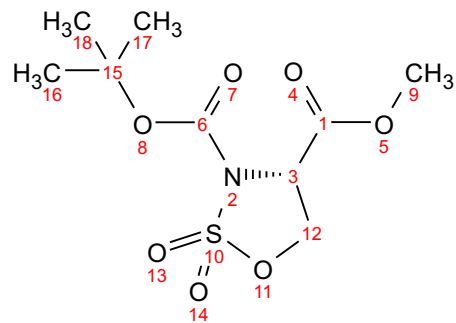

9

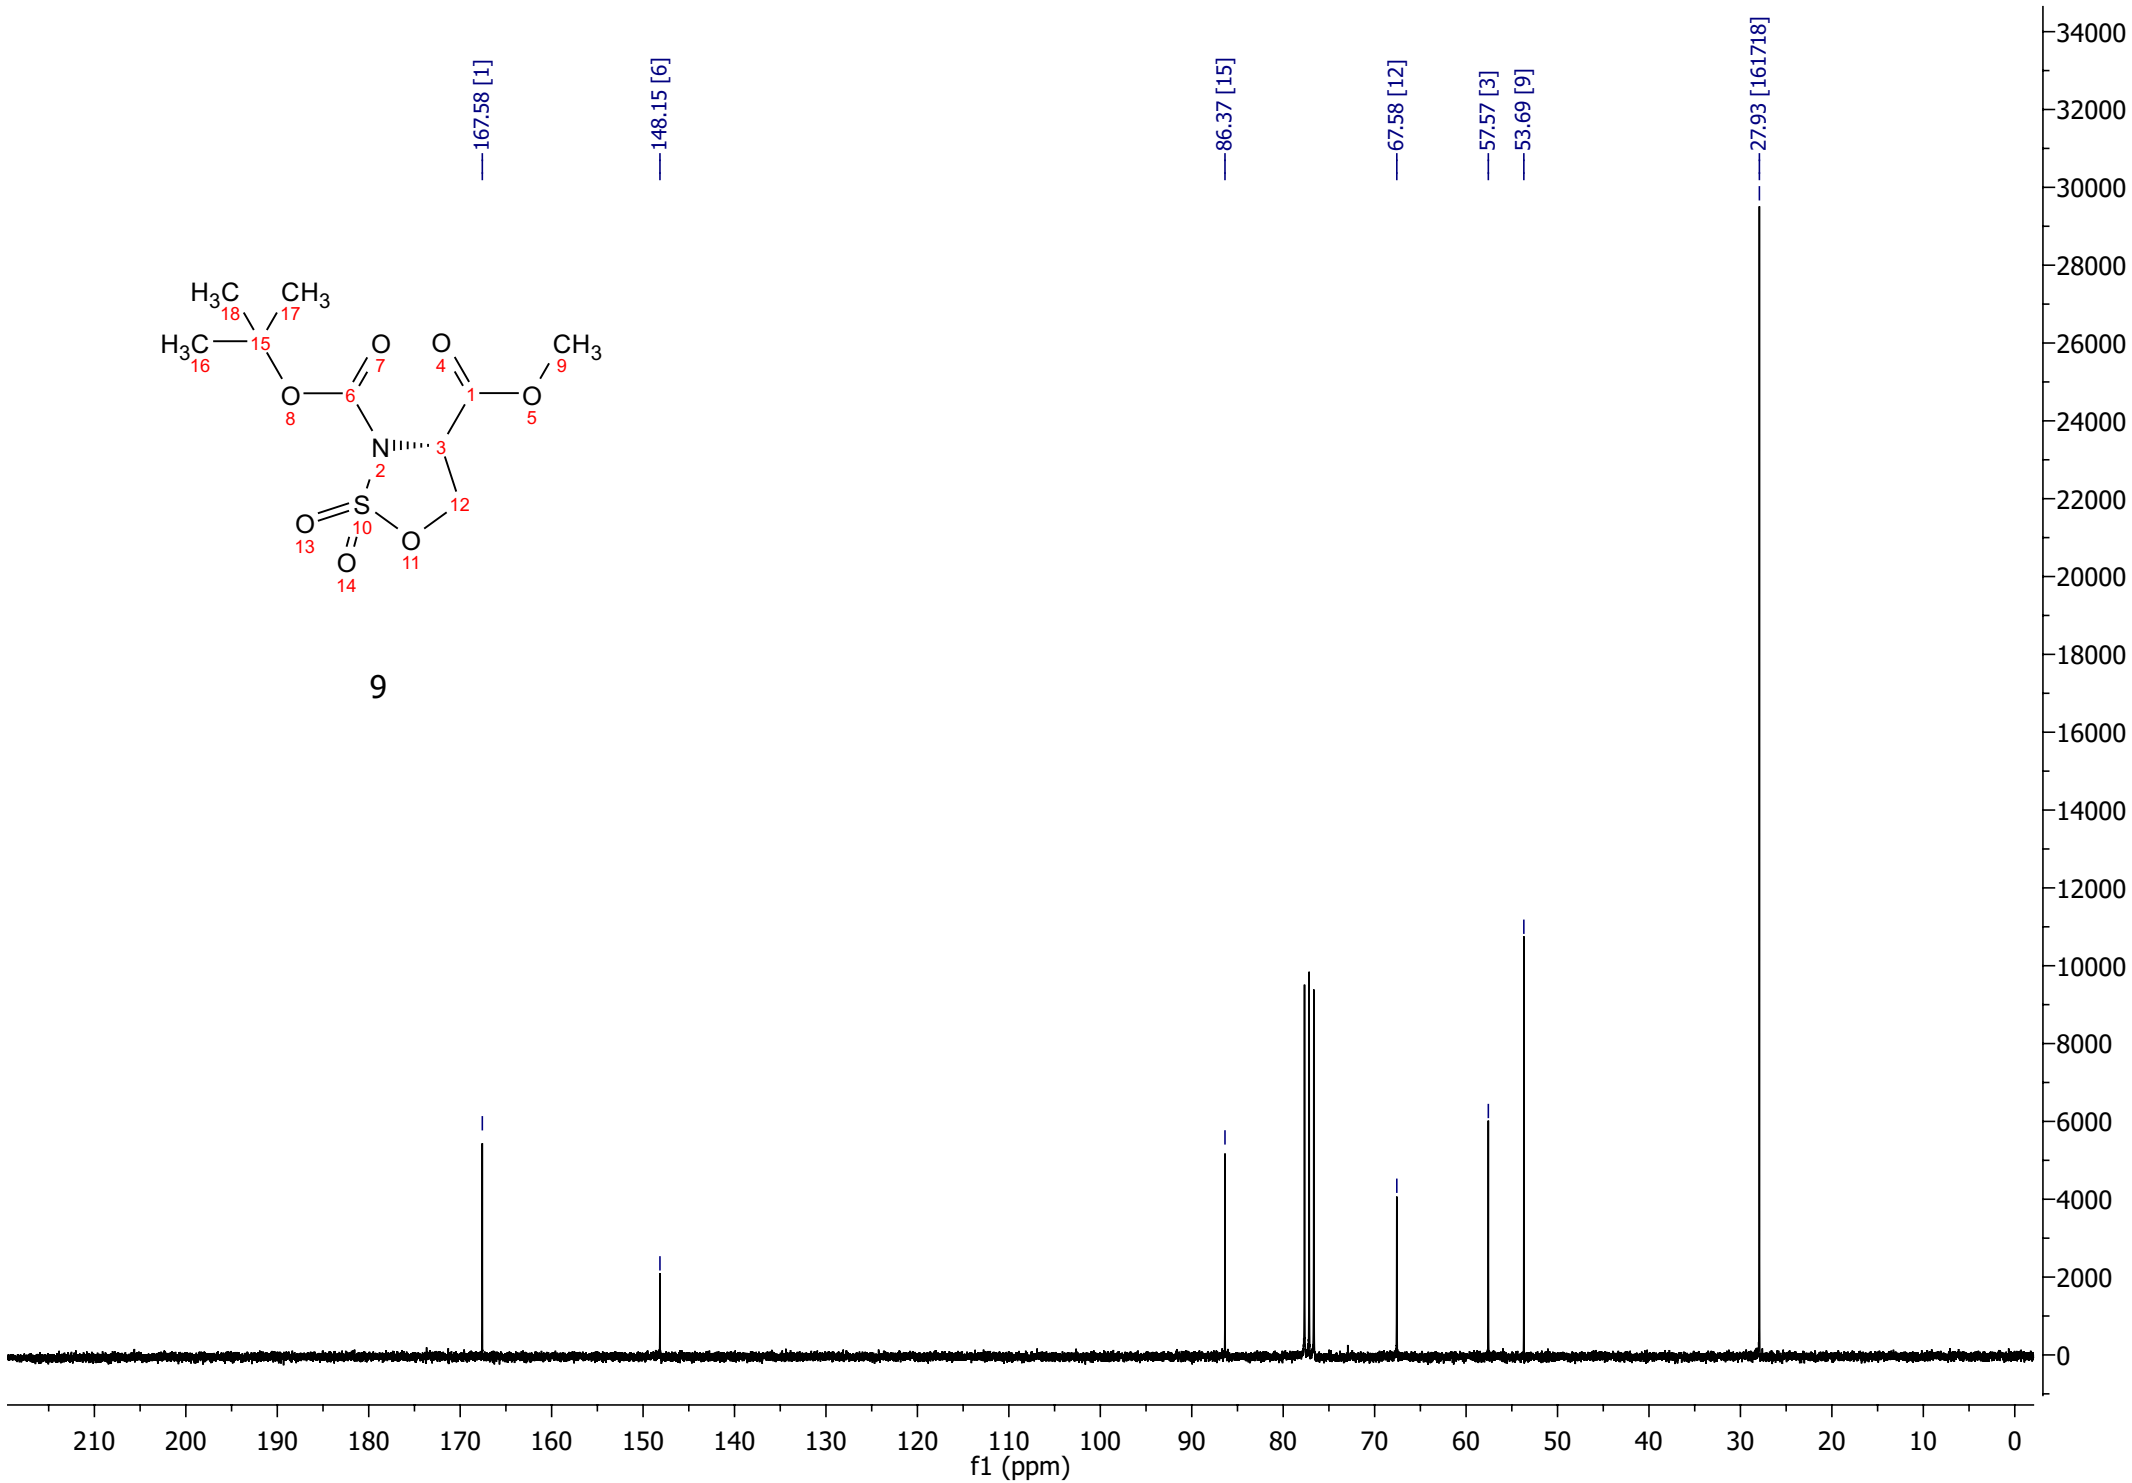

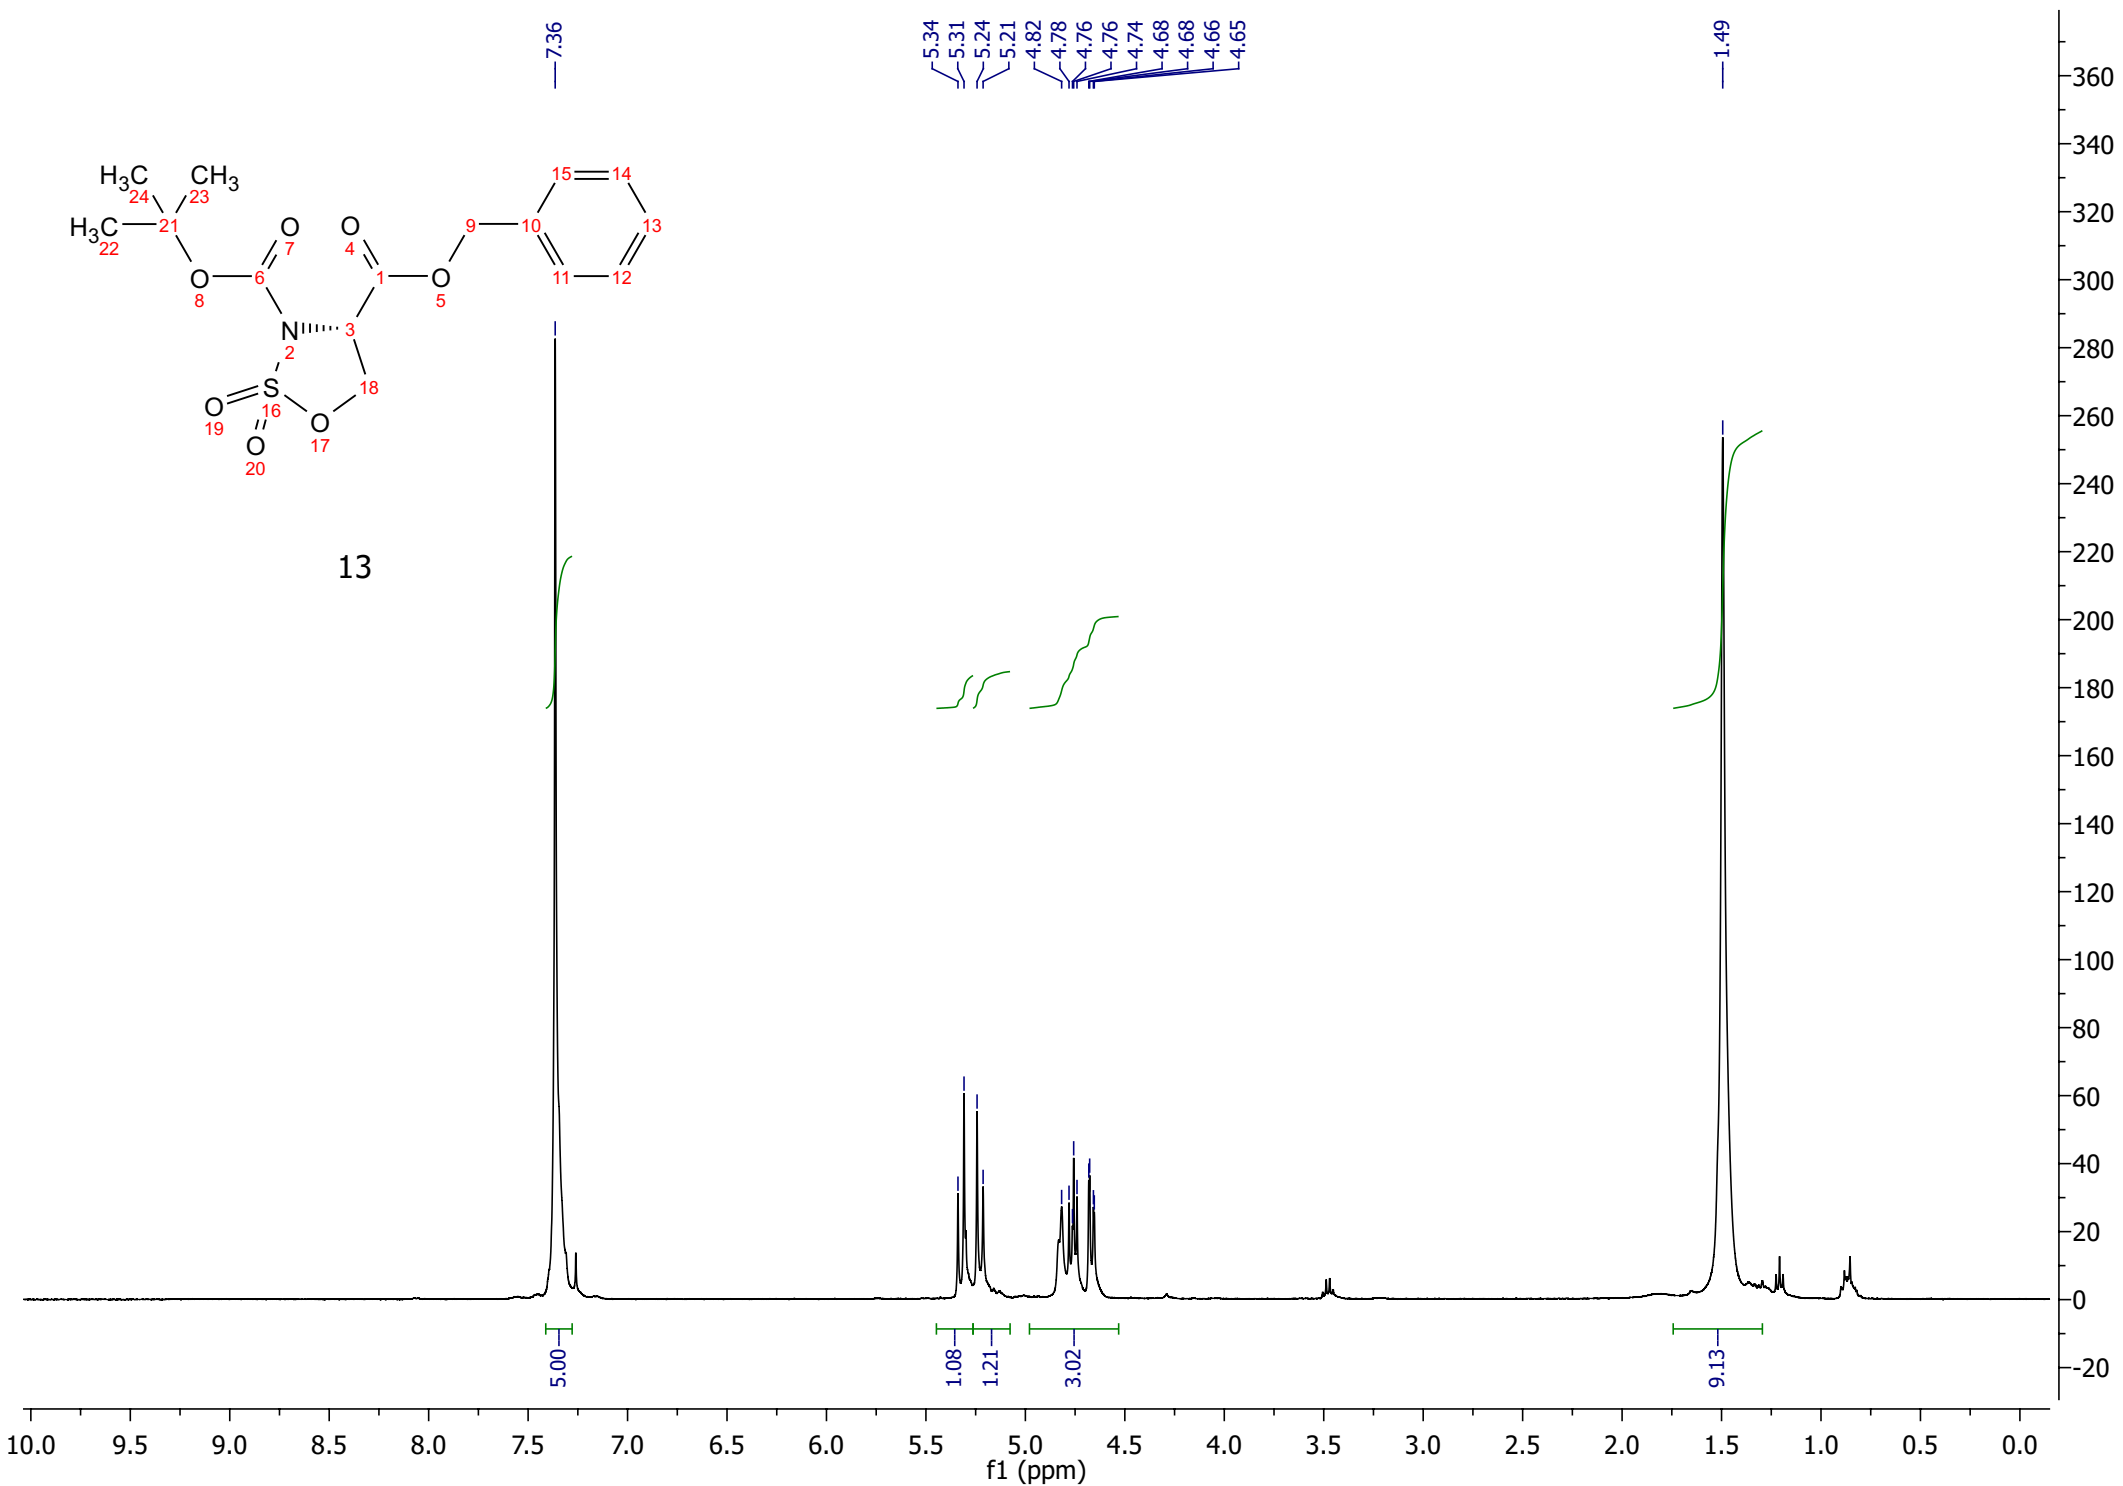

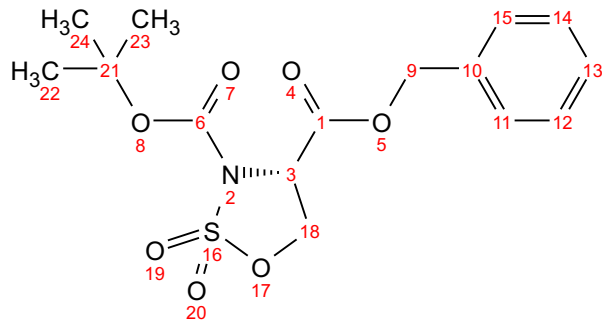

13

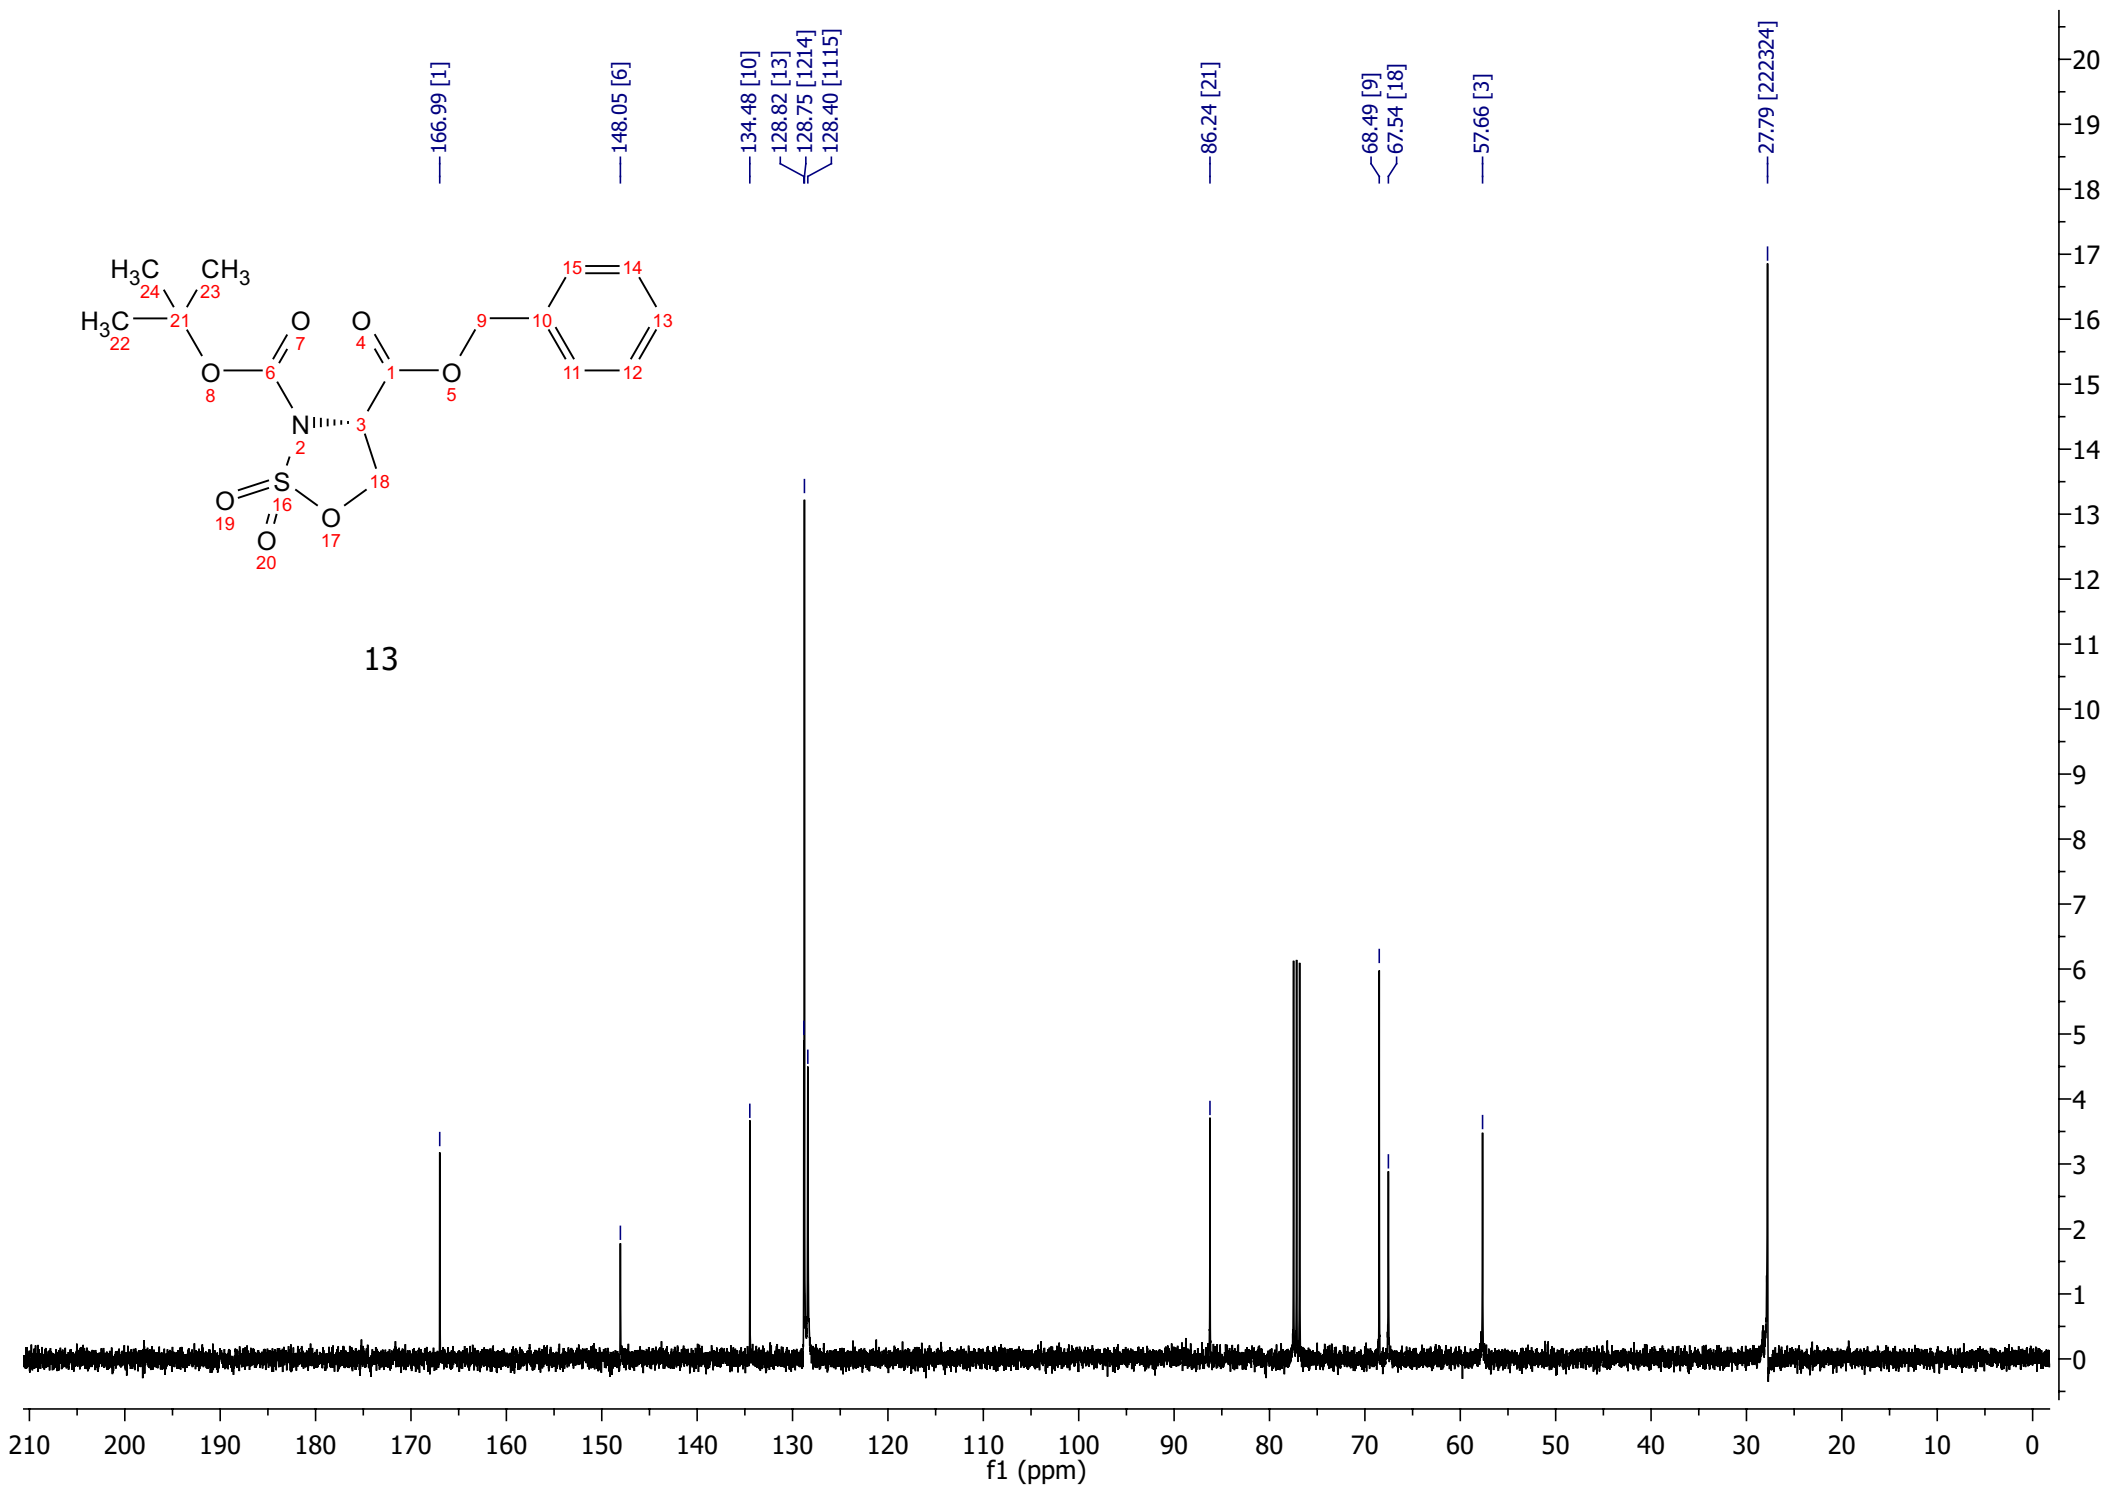

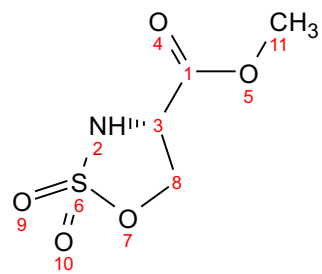

10

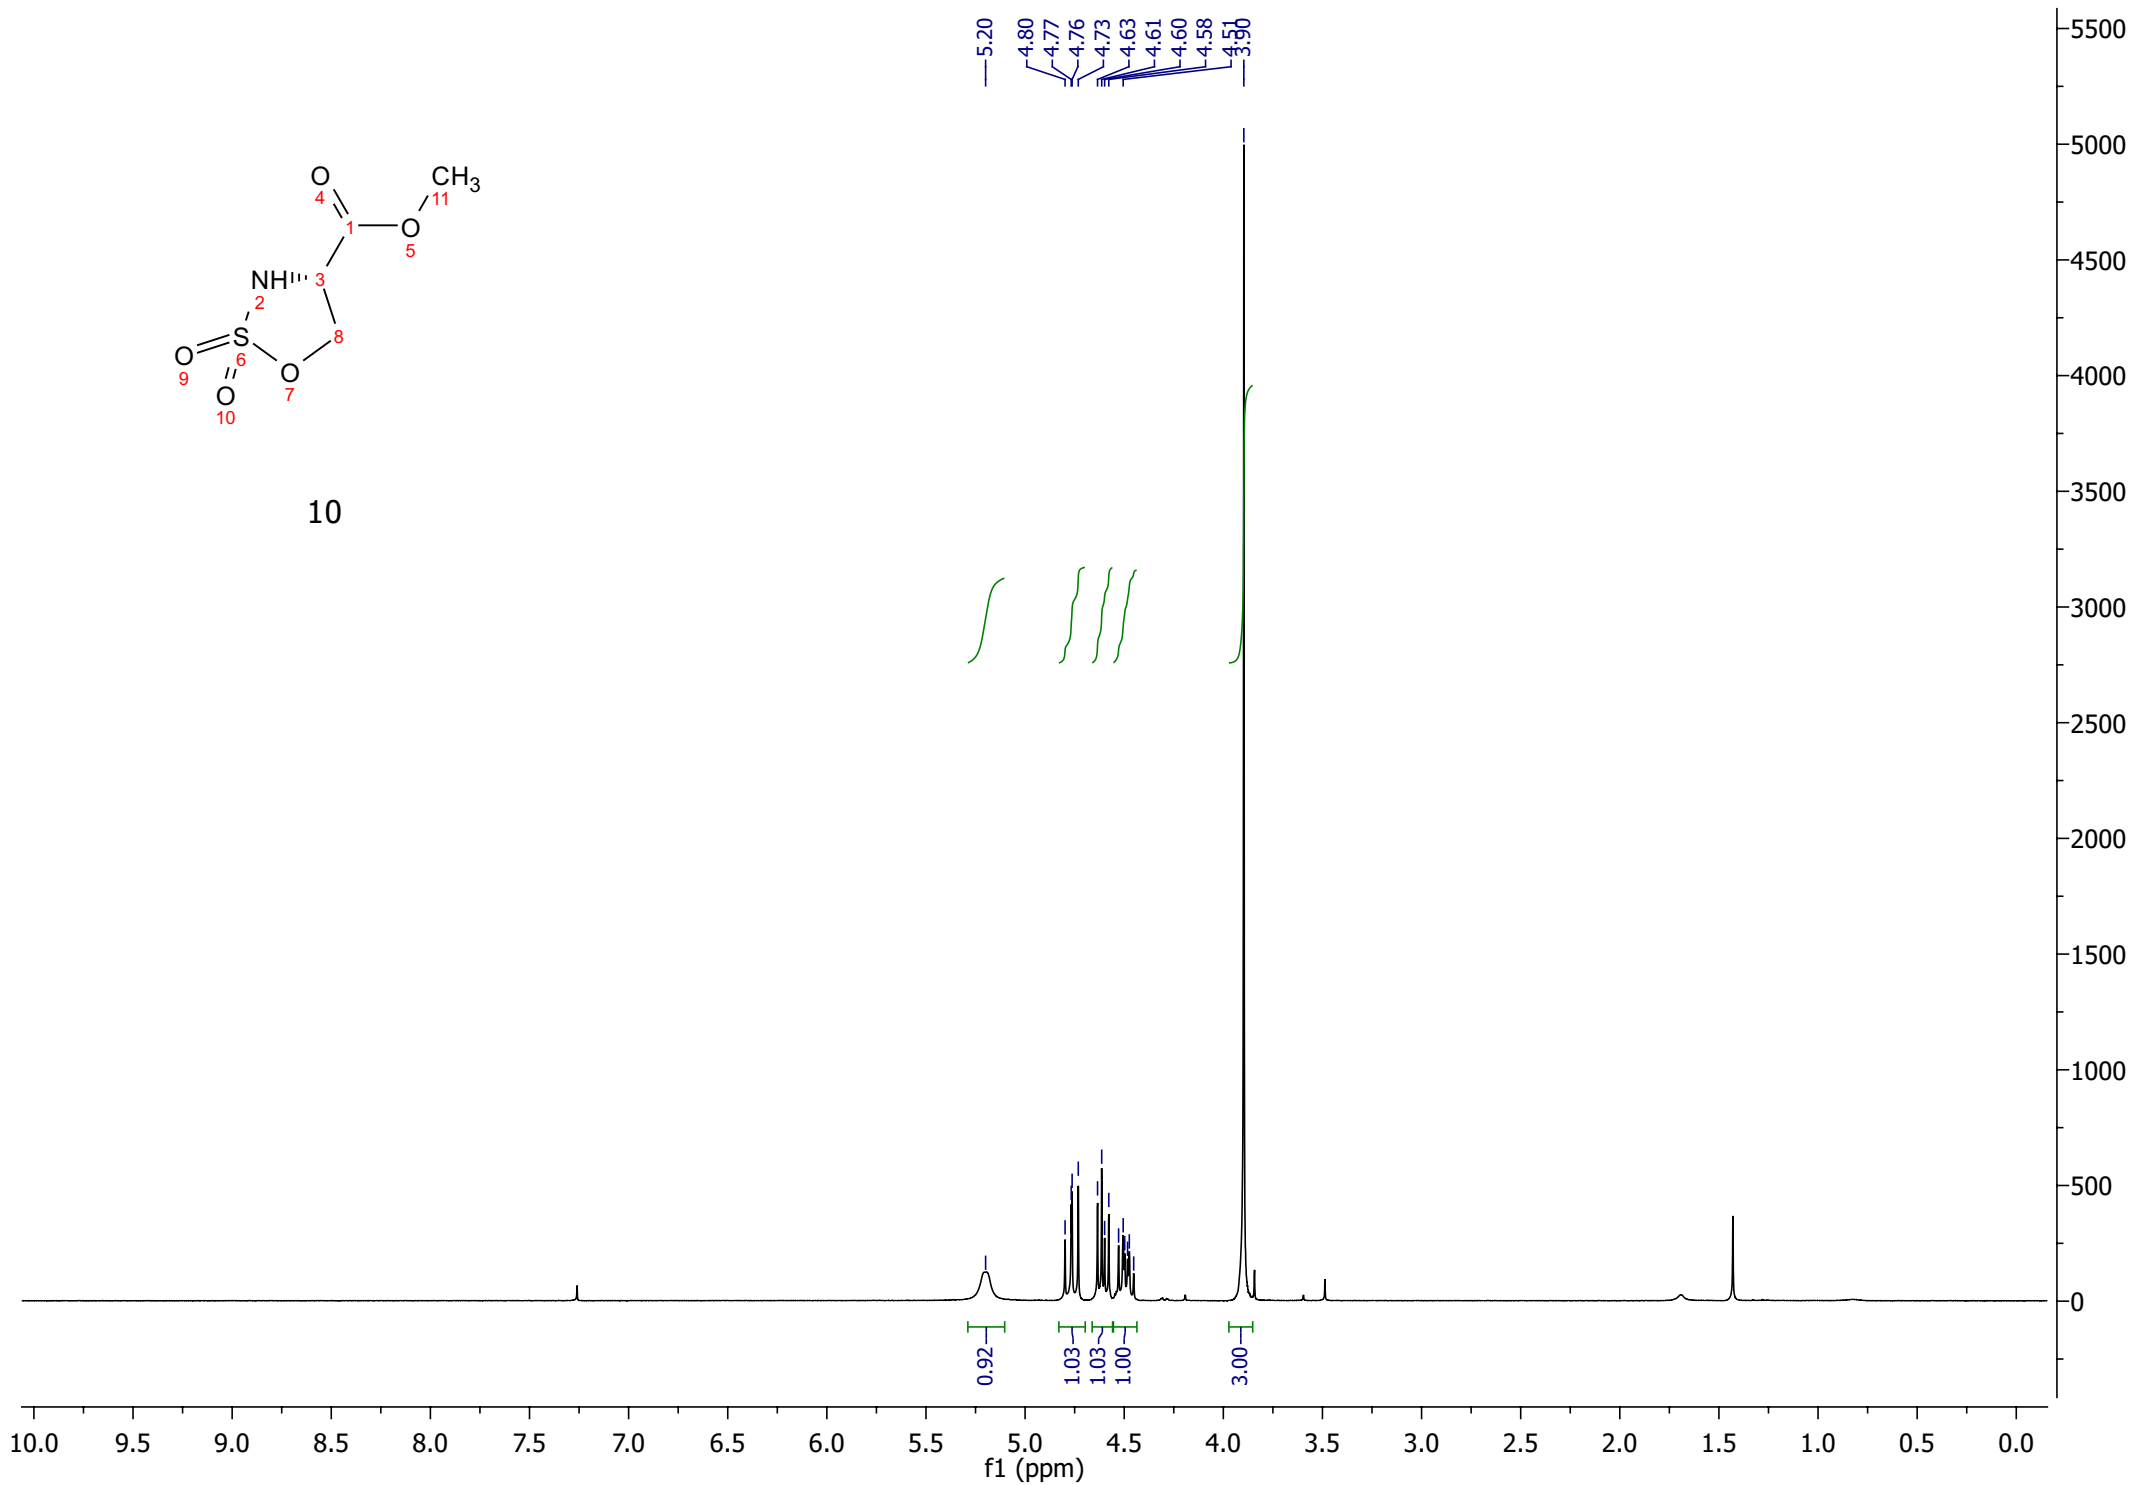

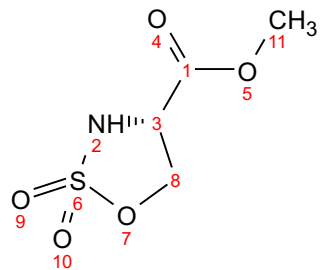

10

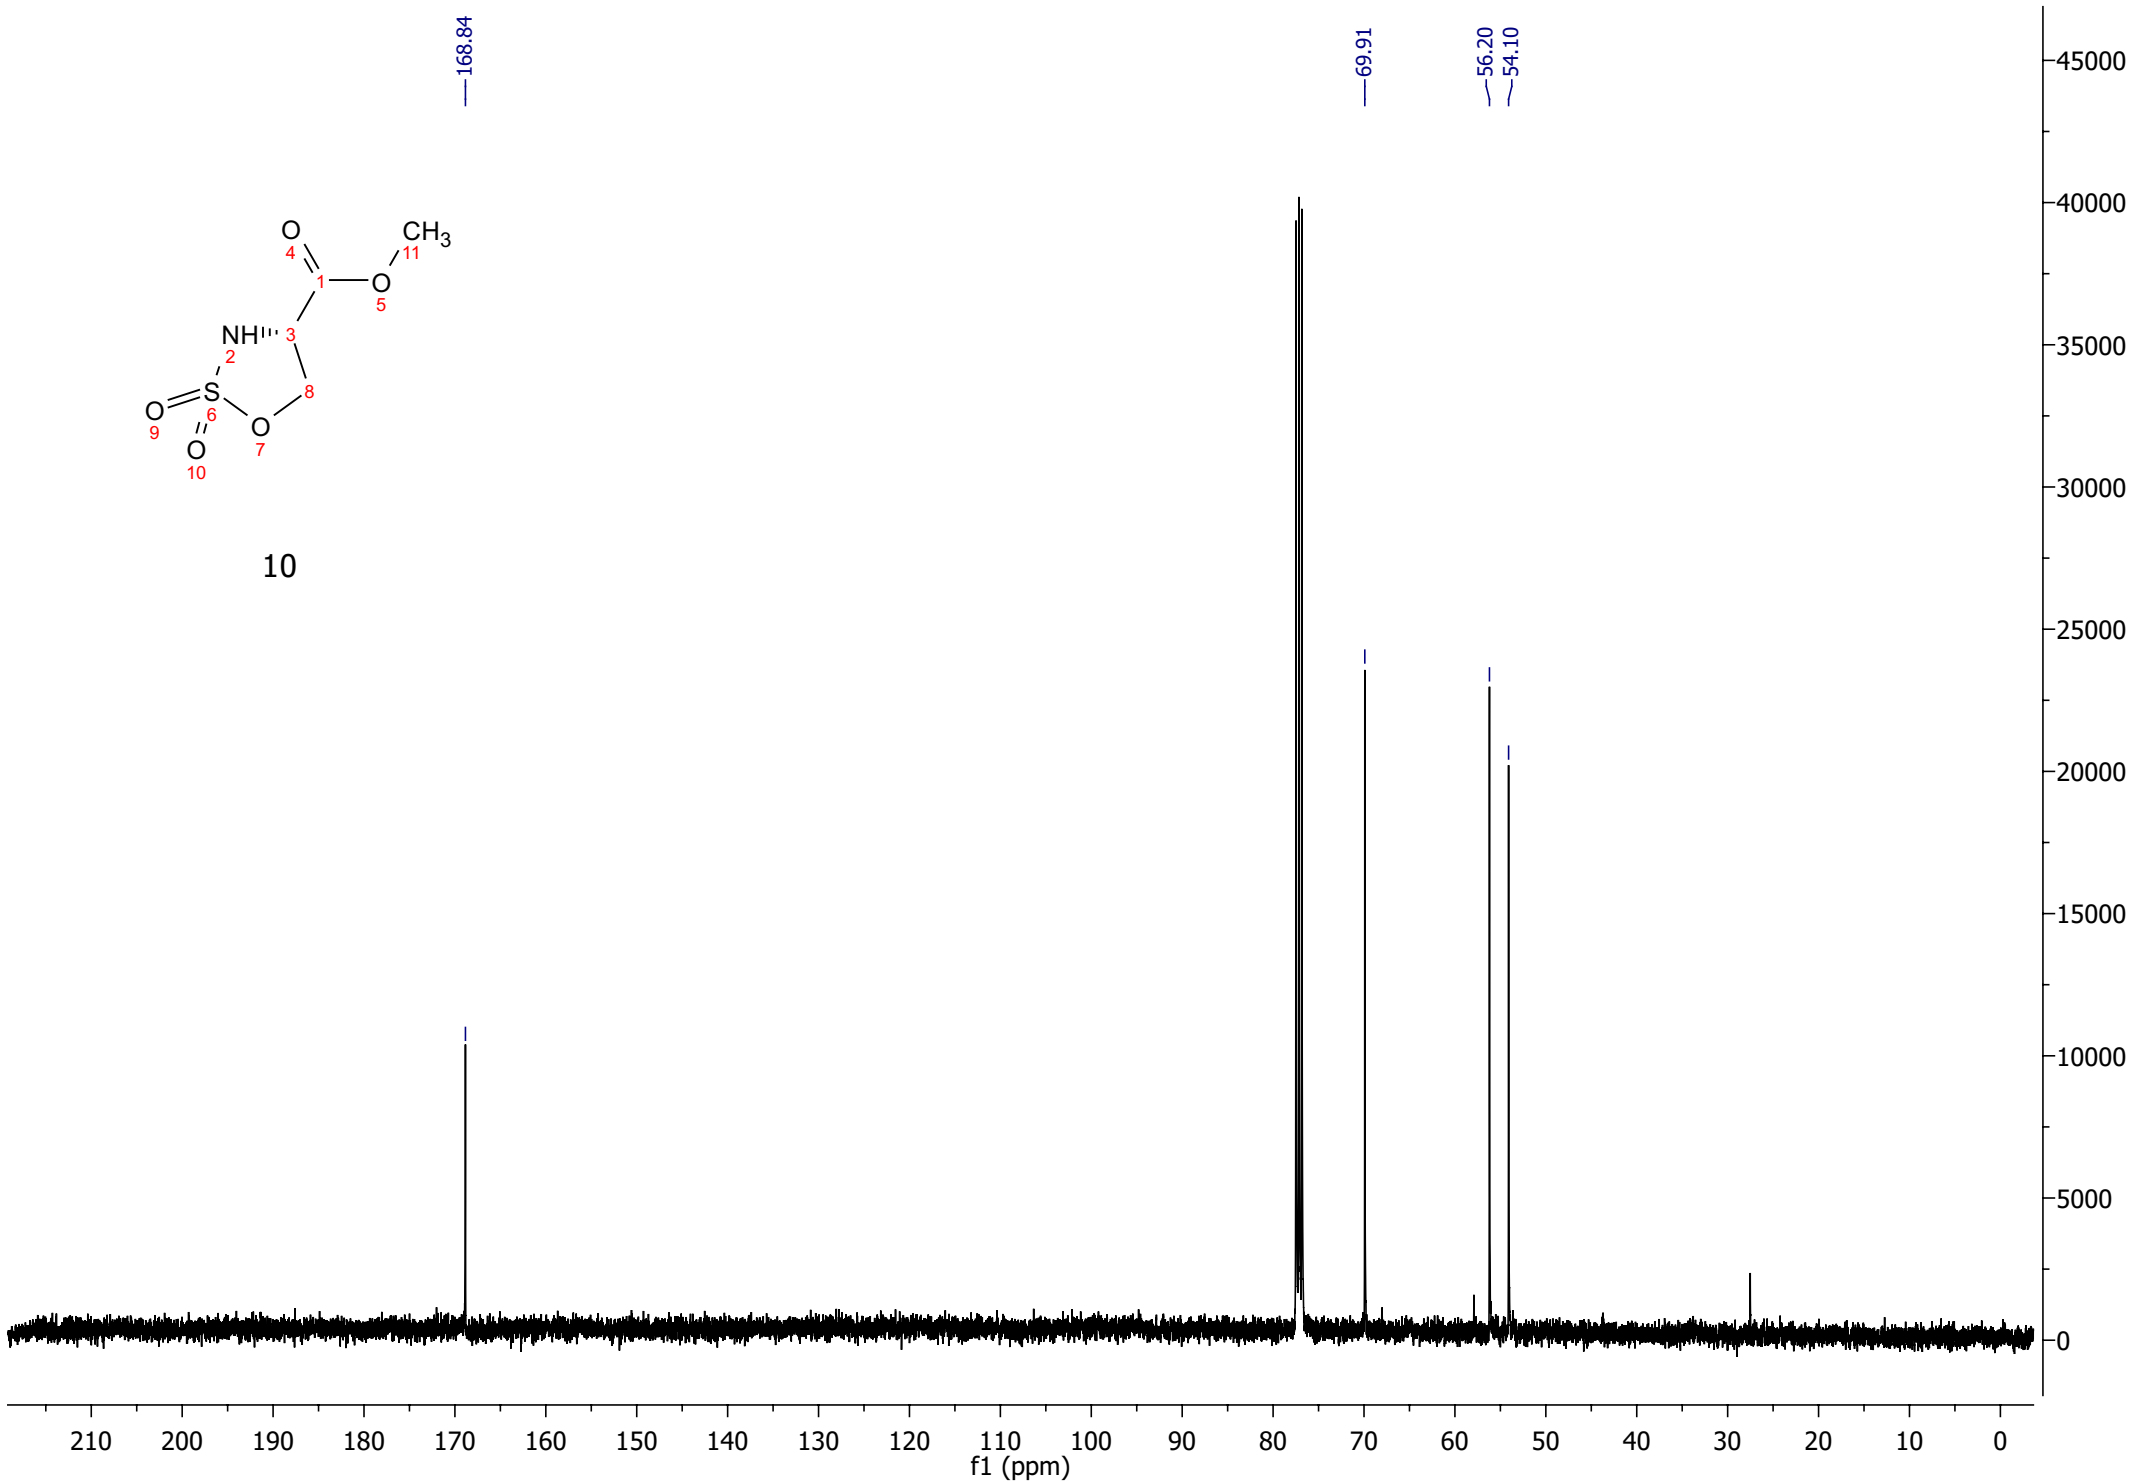



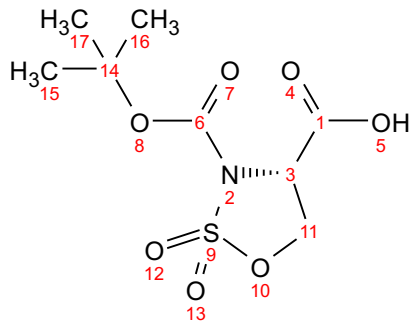

14

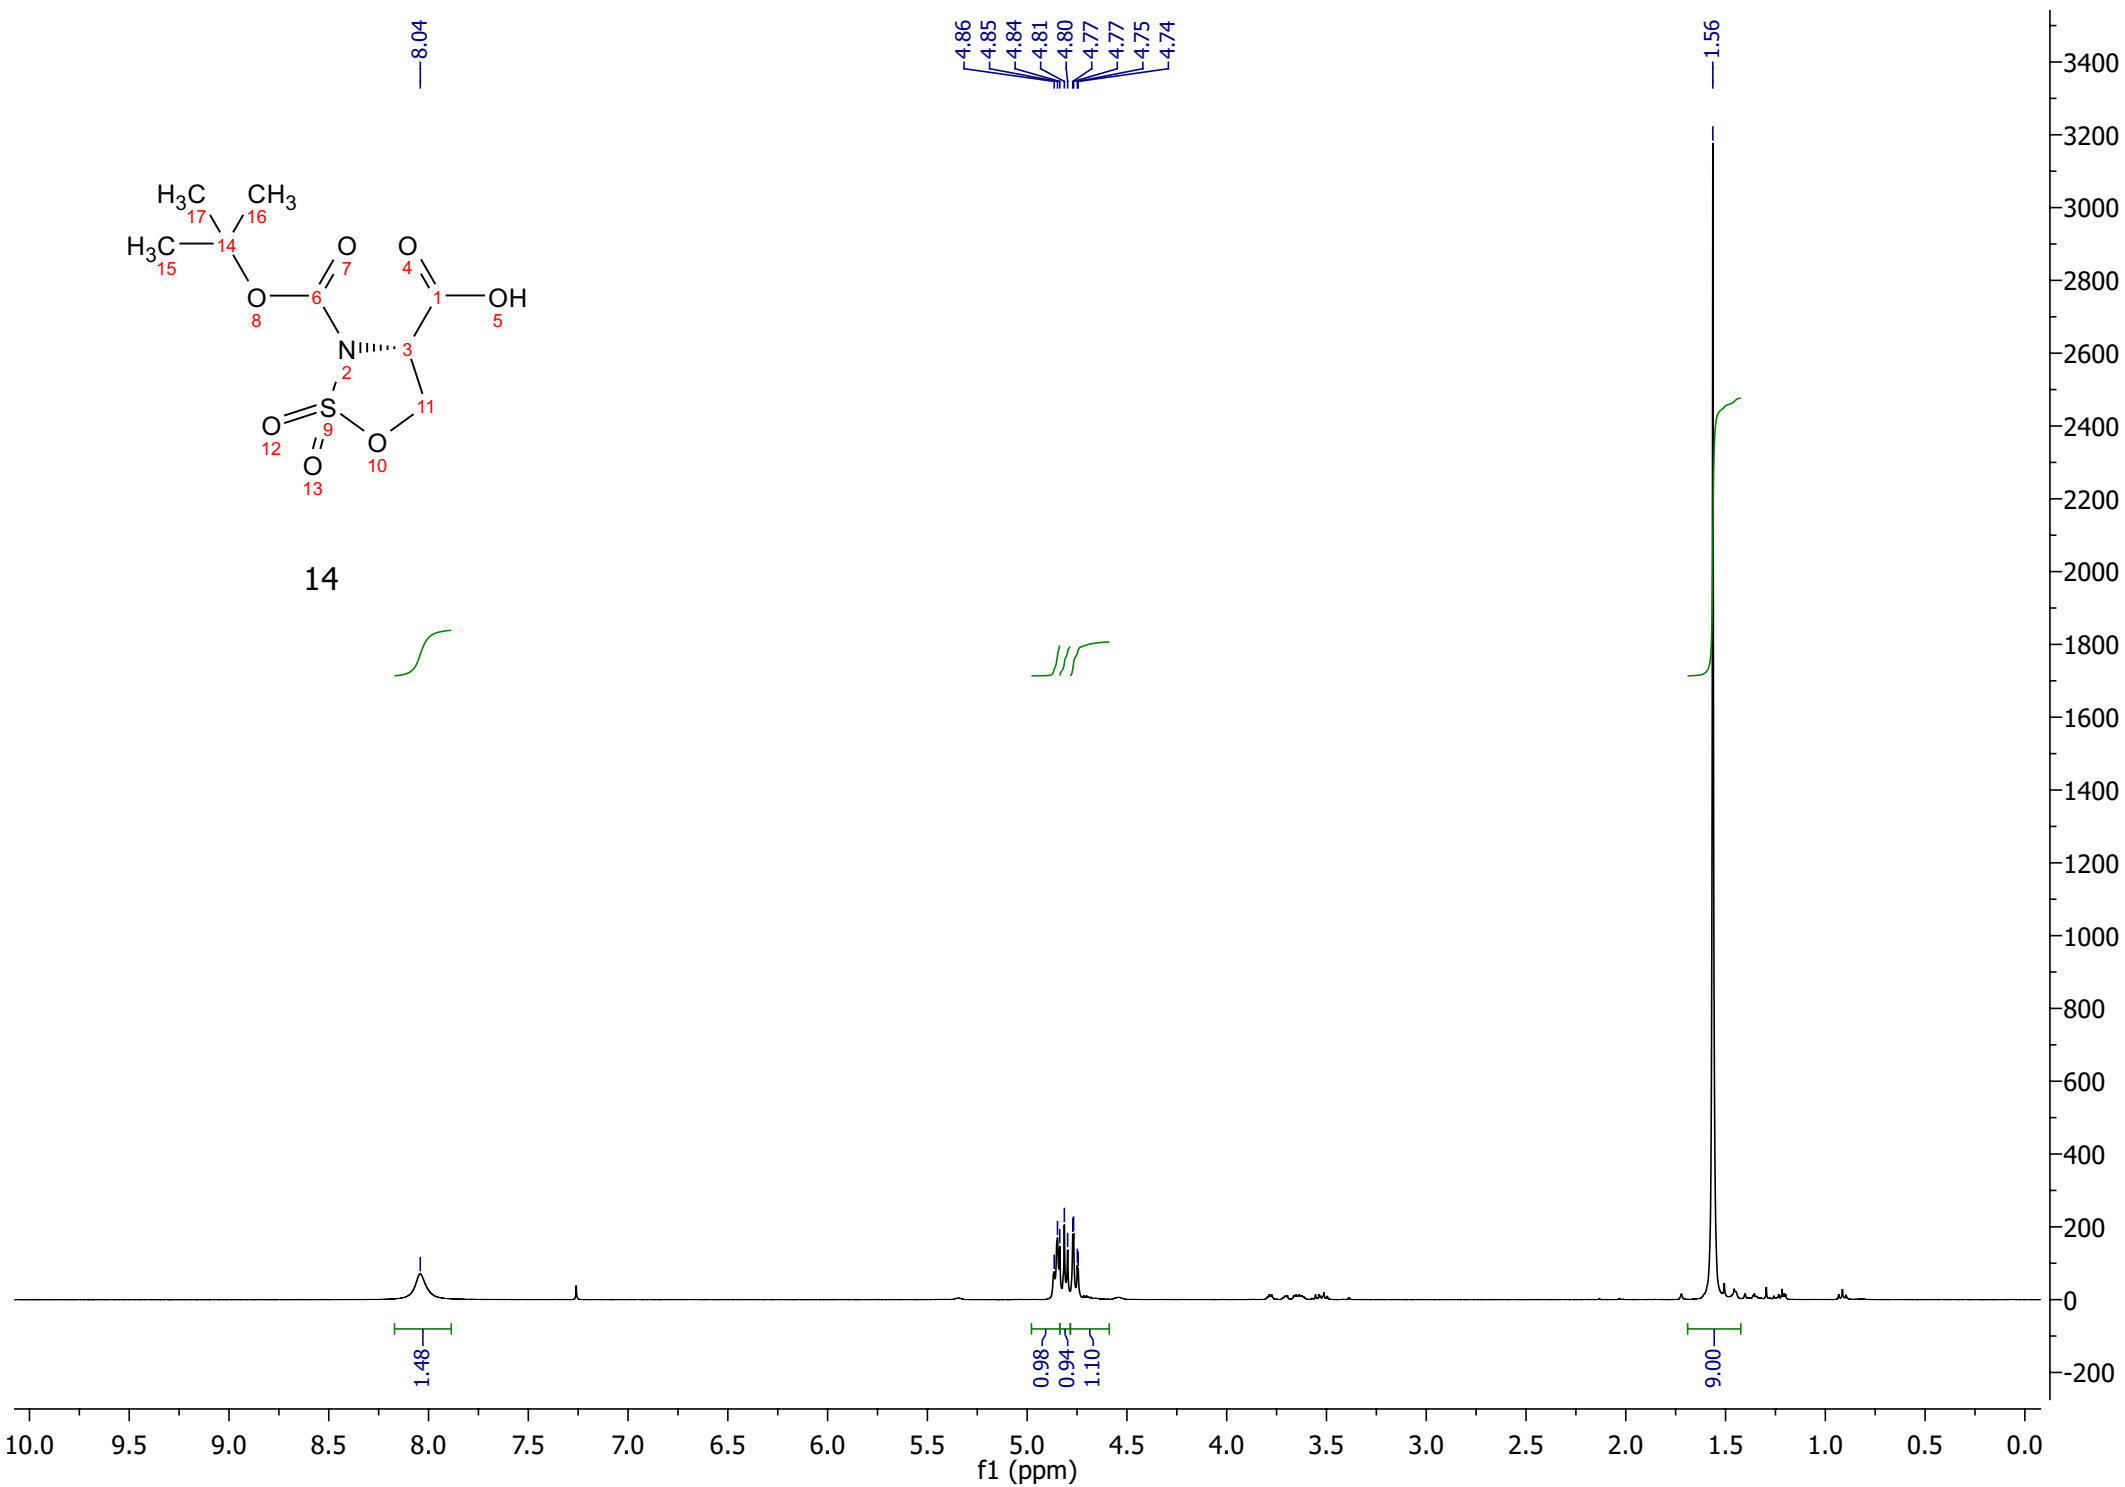

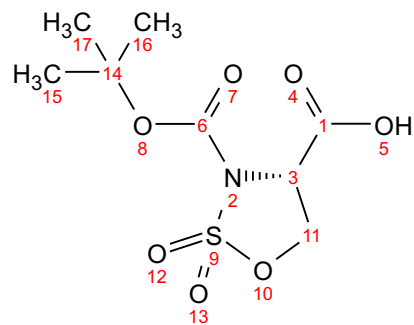

14

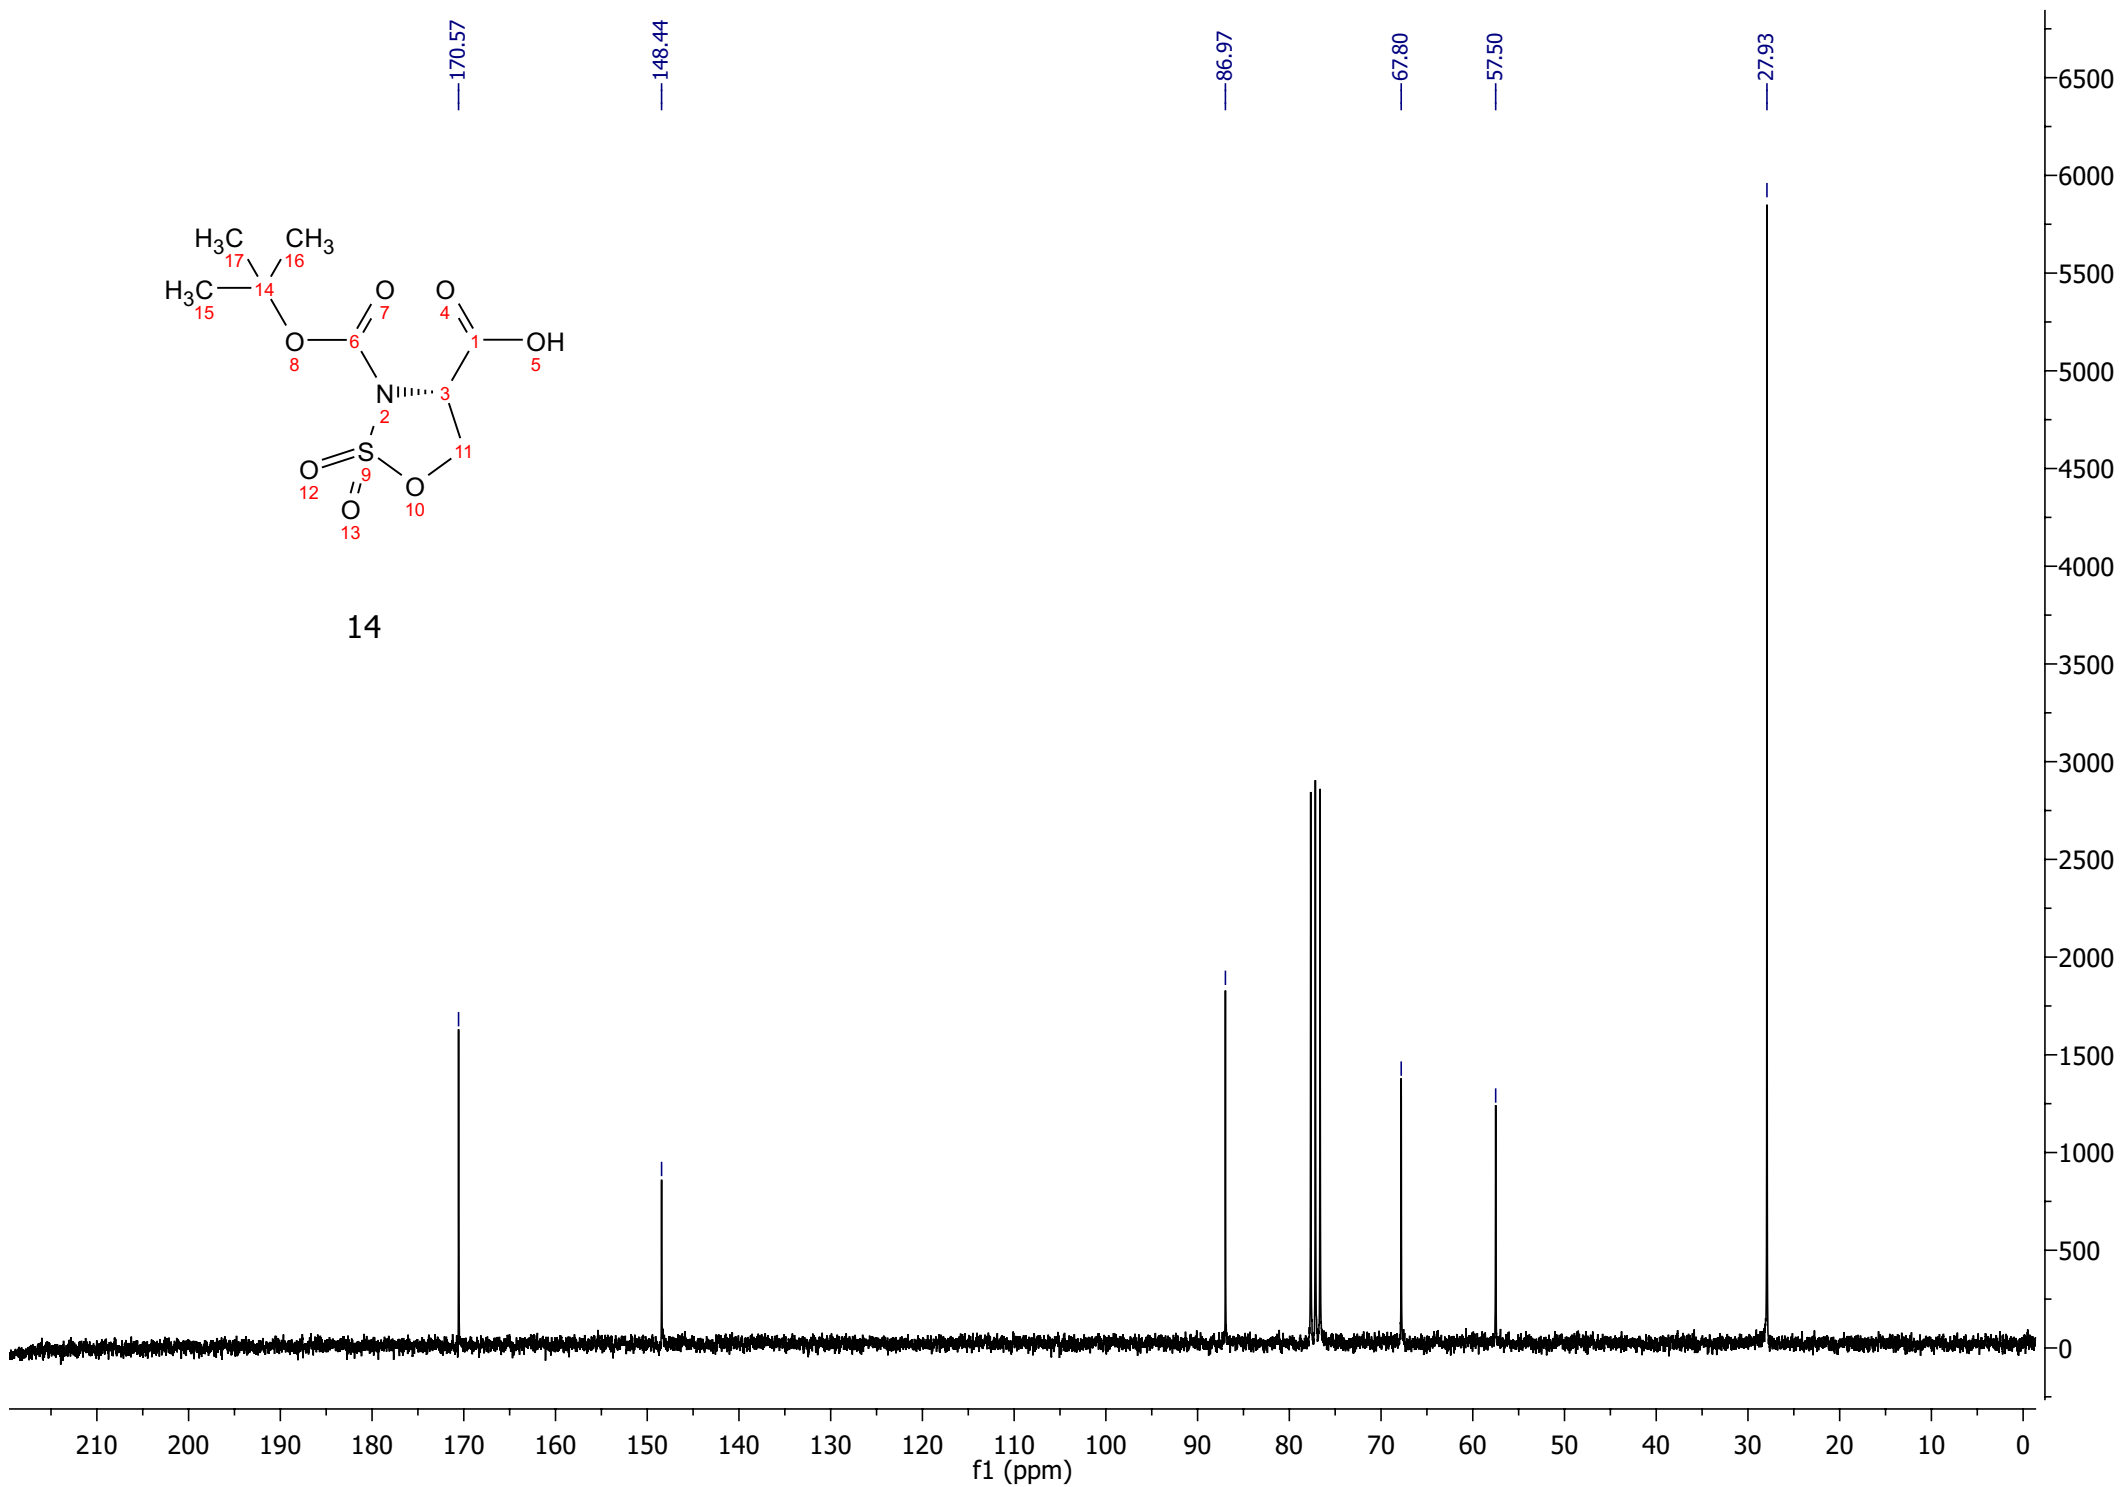

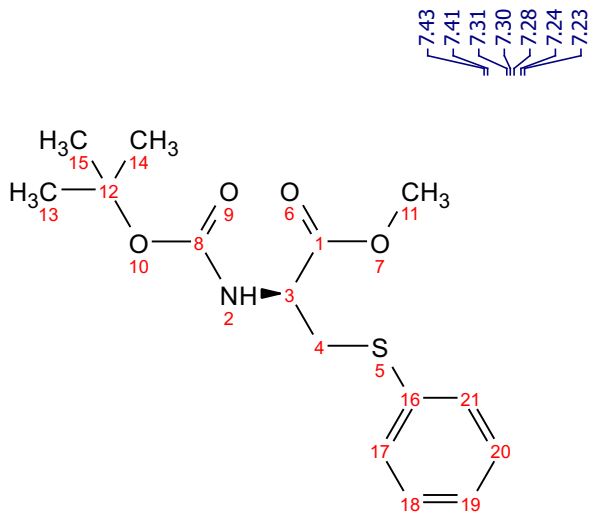

16

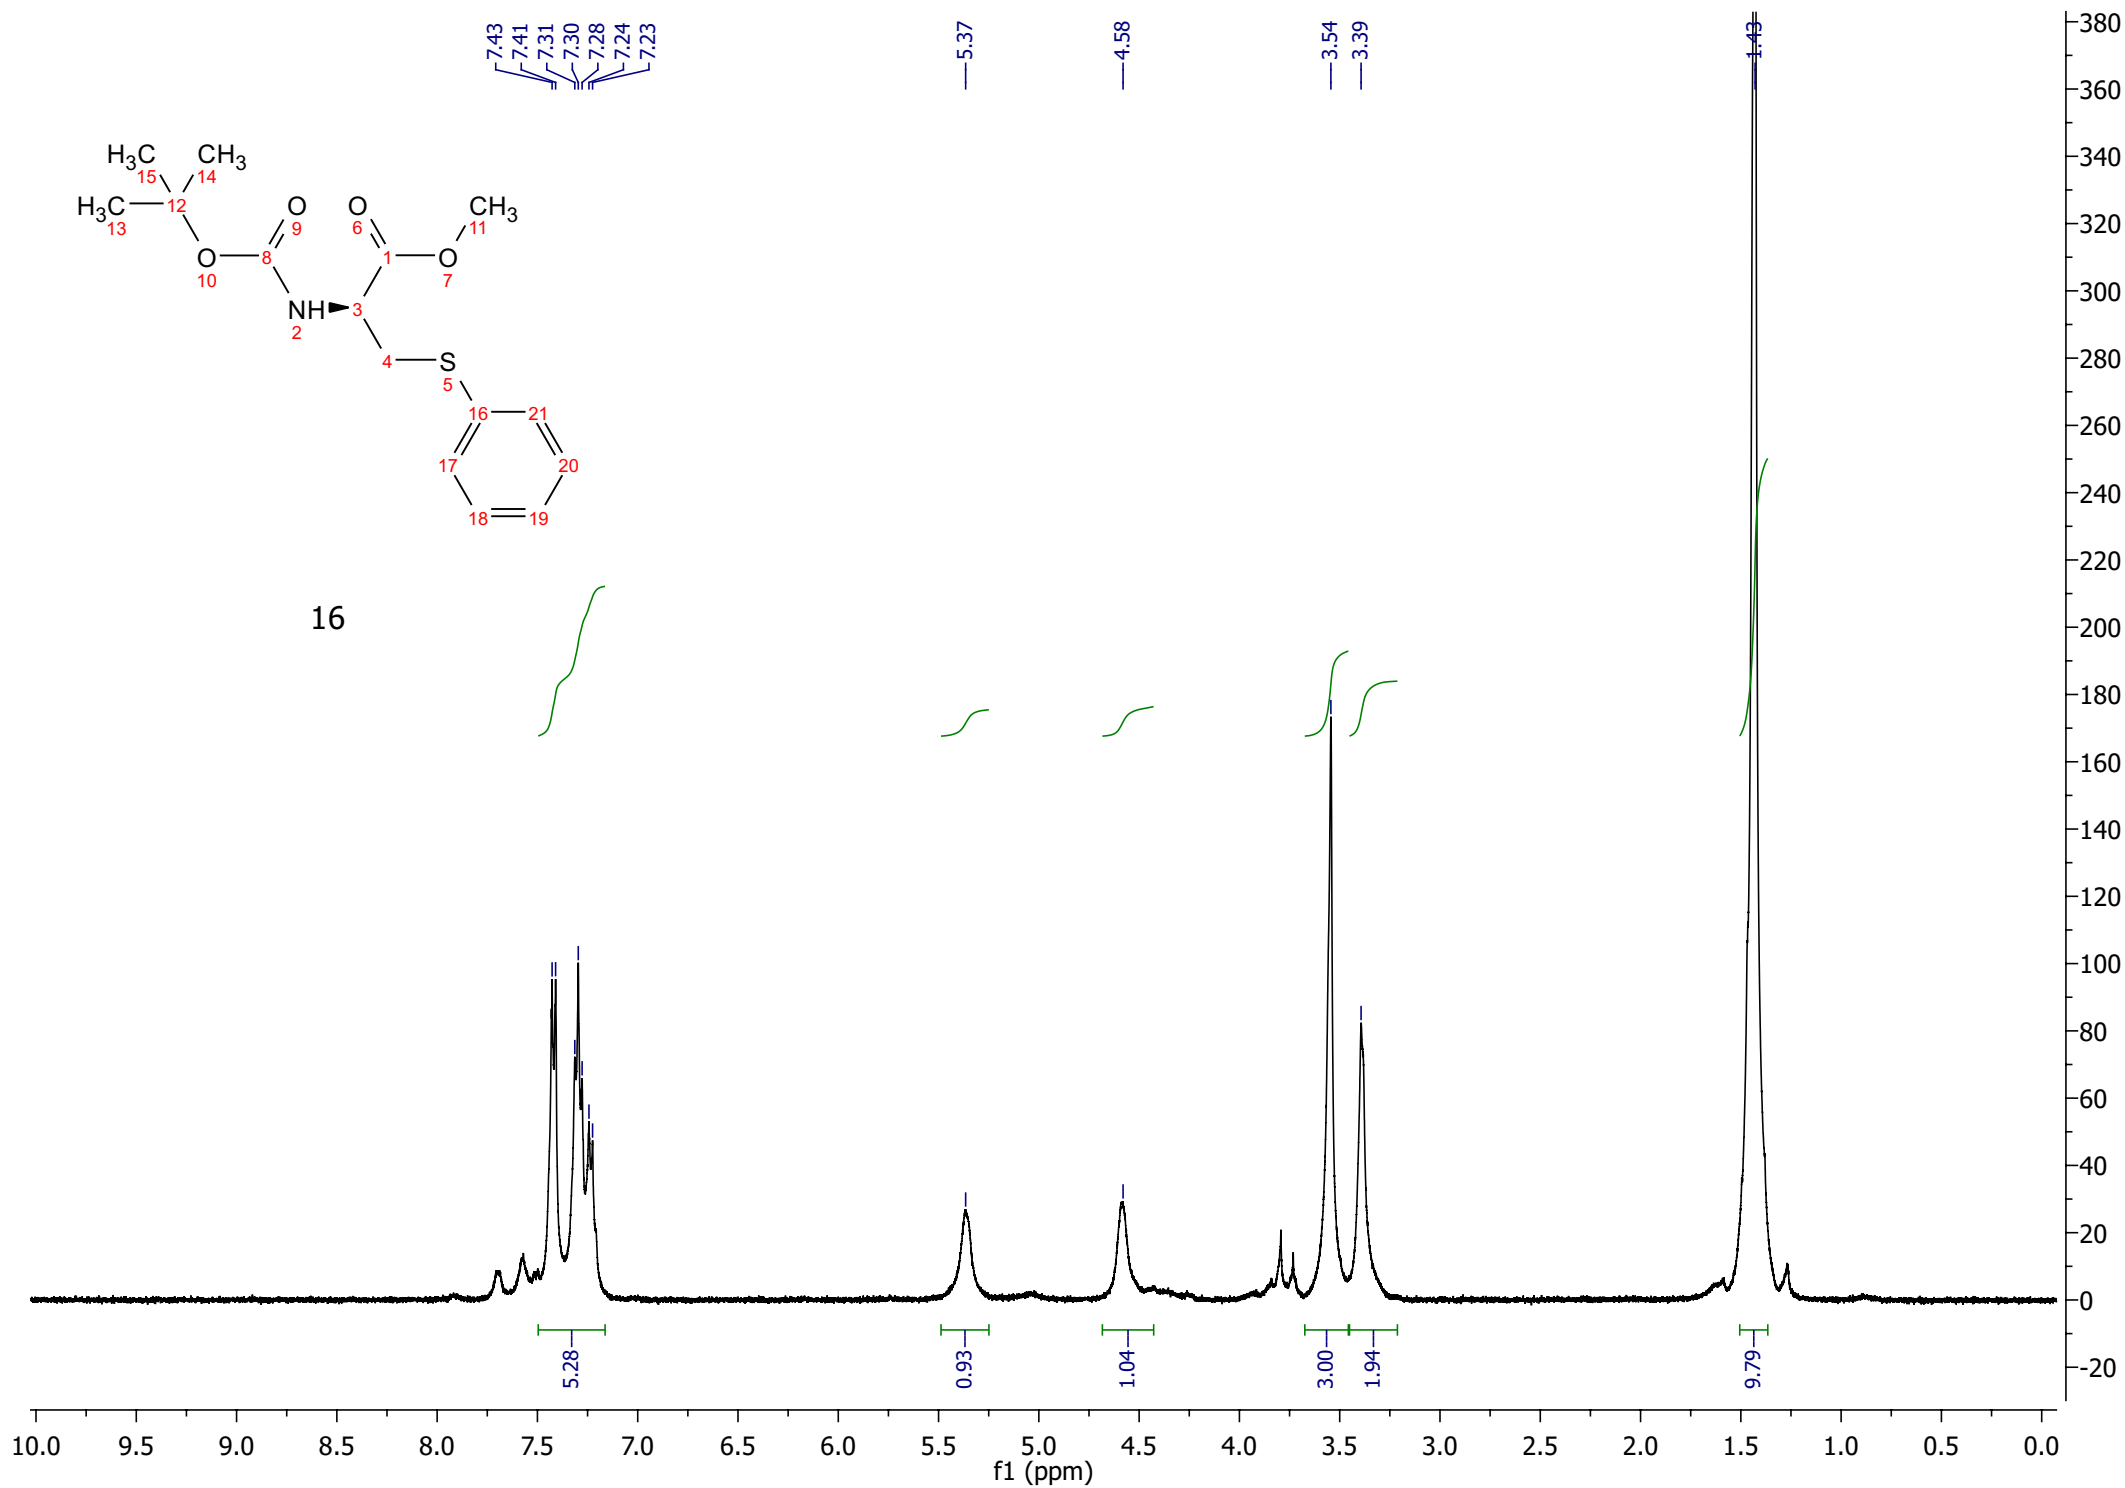

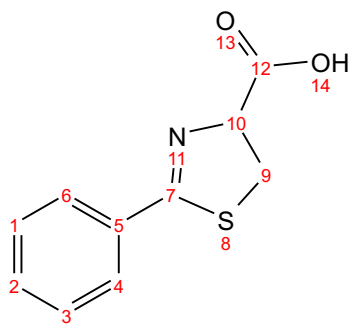

18

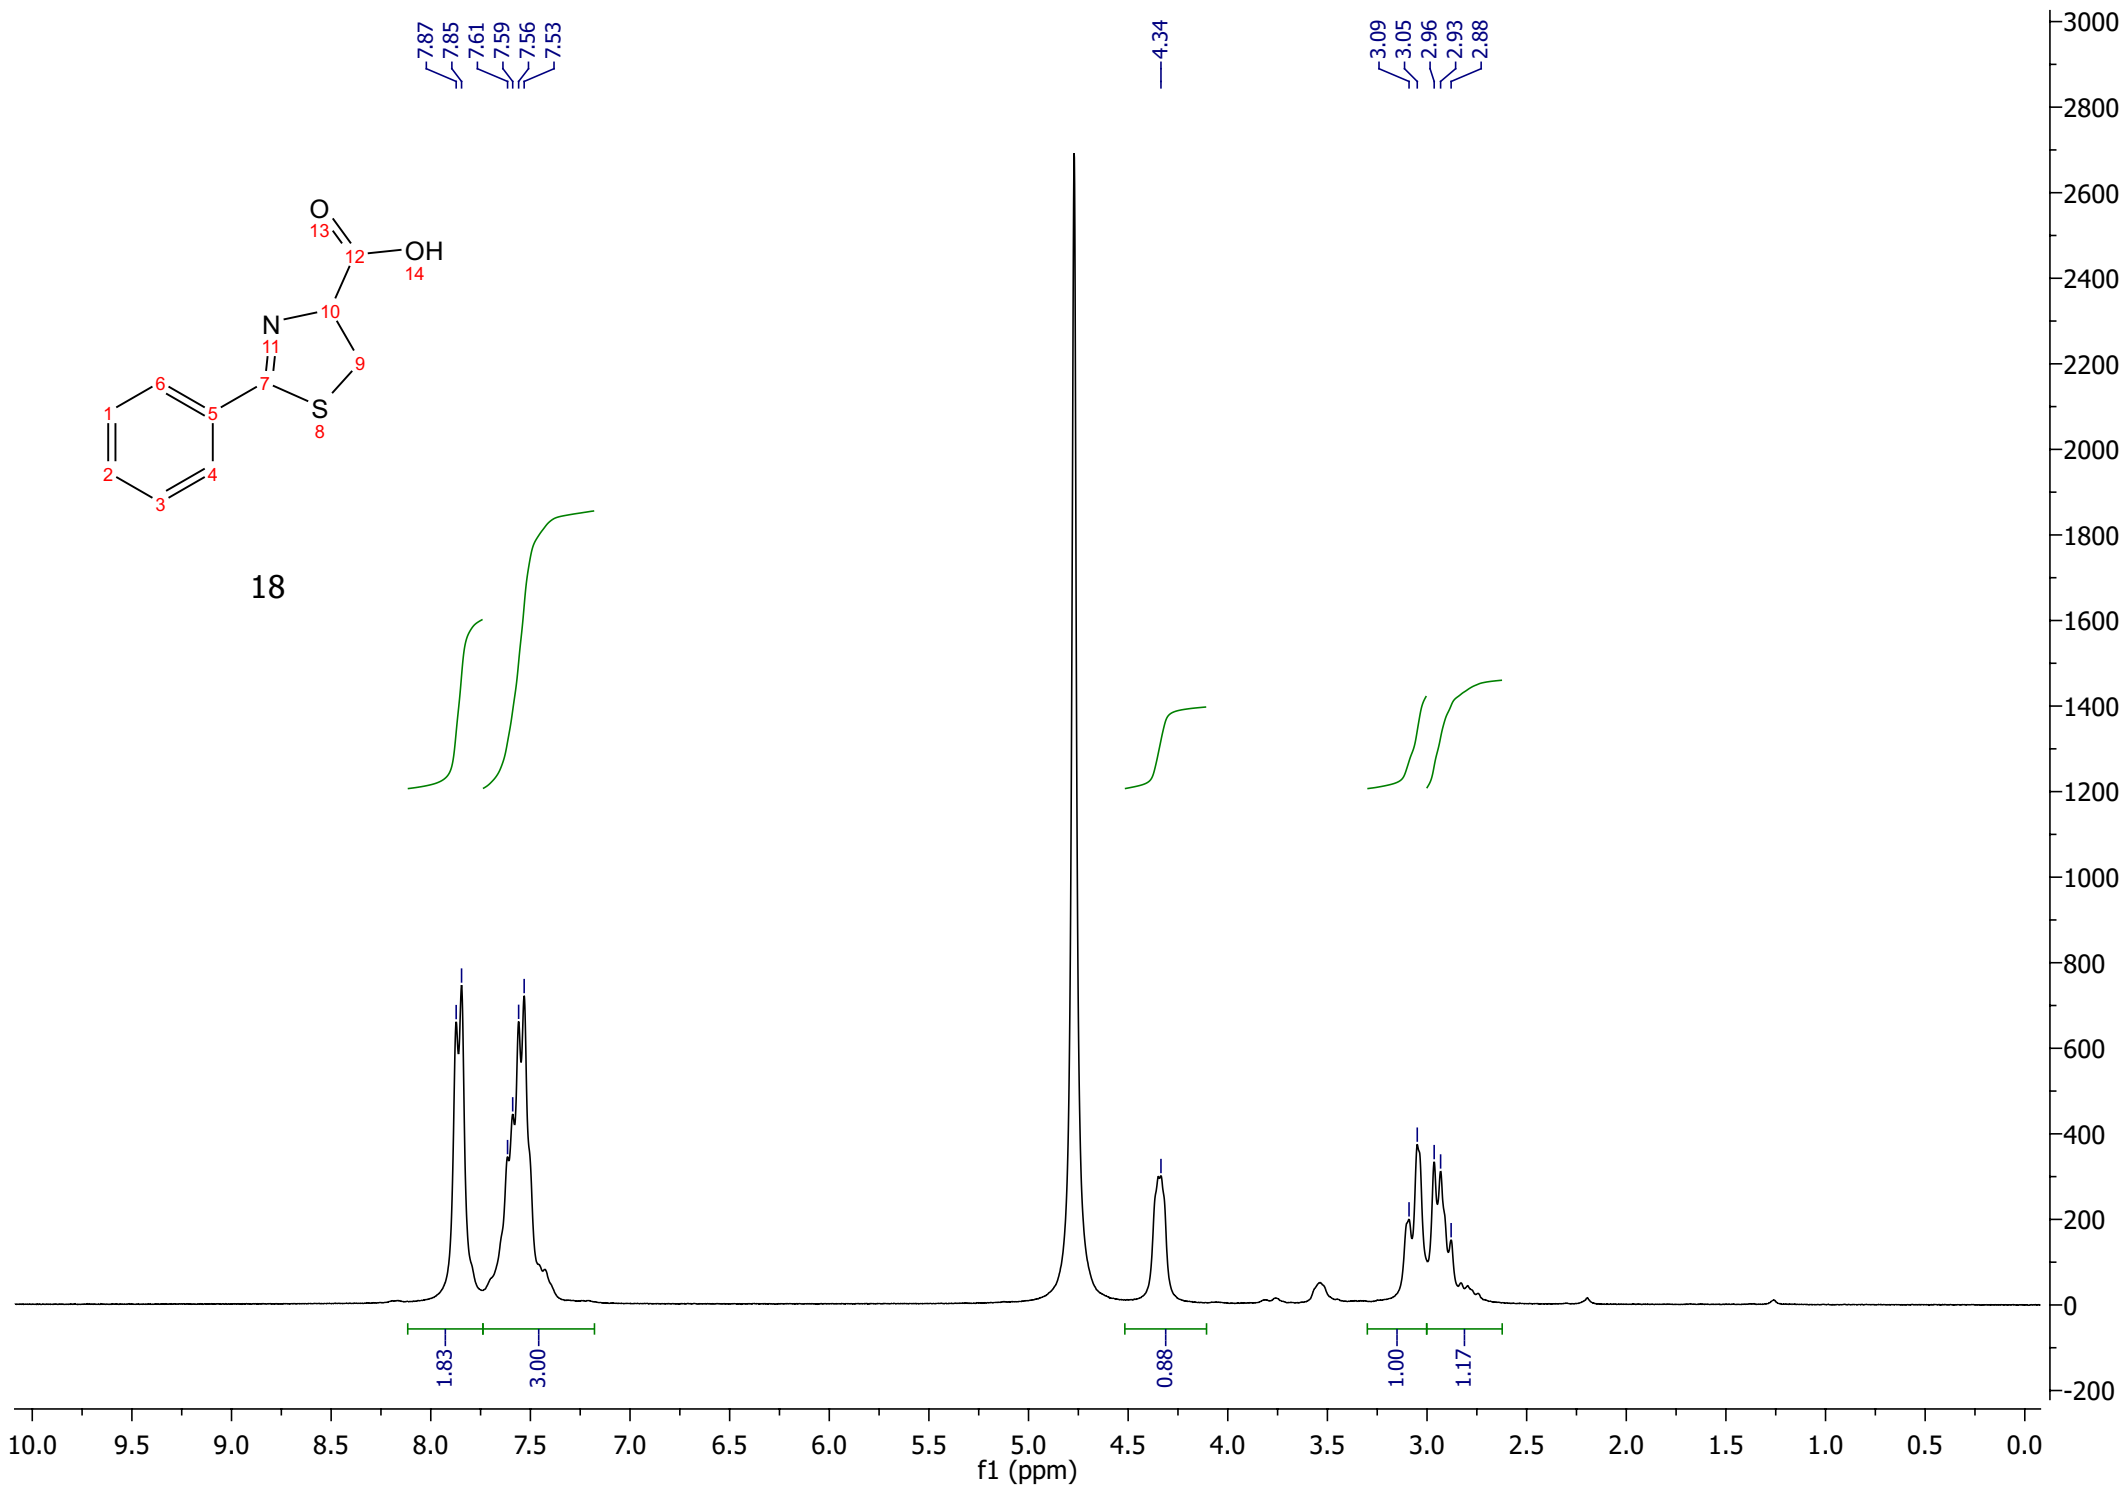

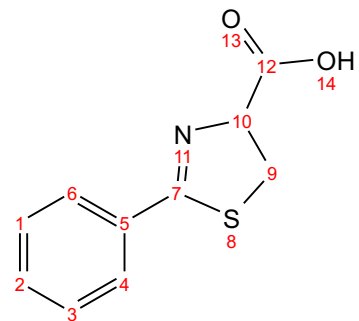

18

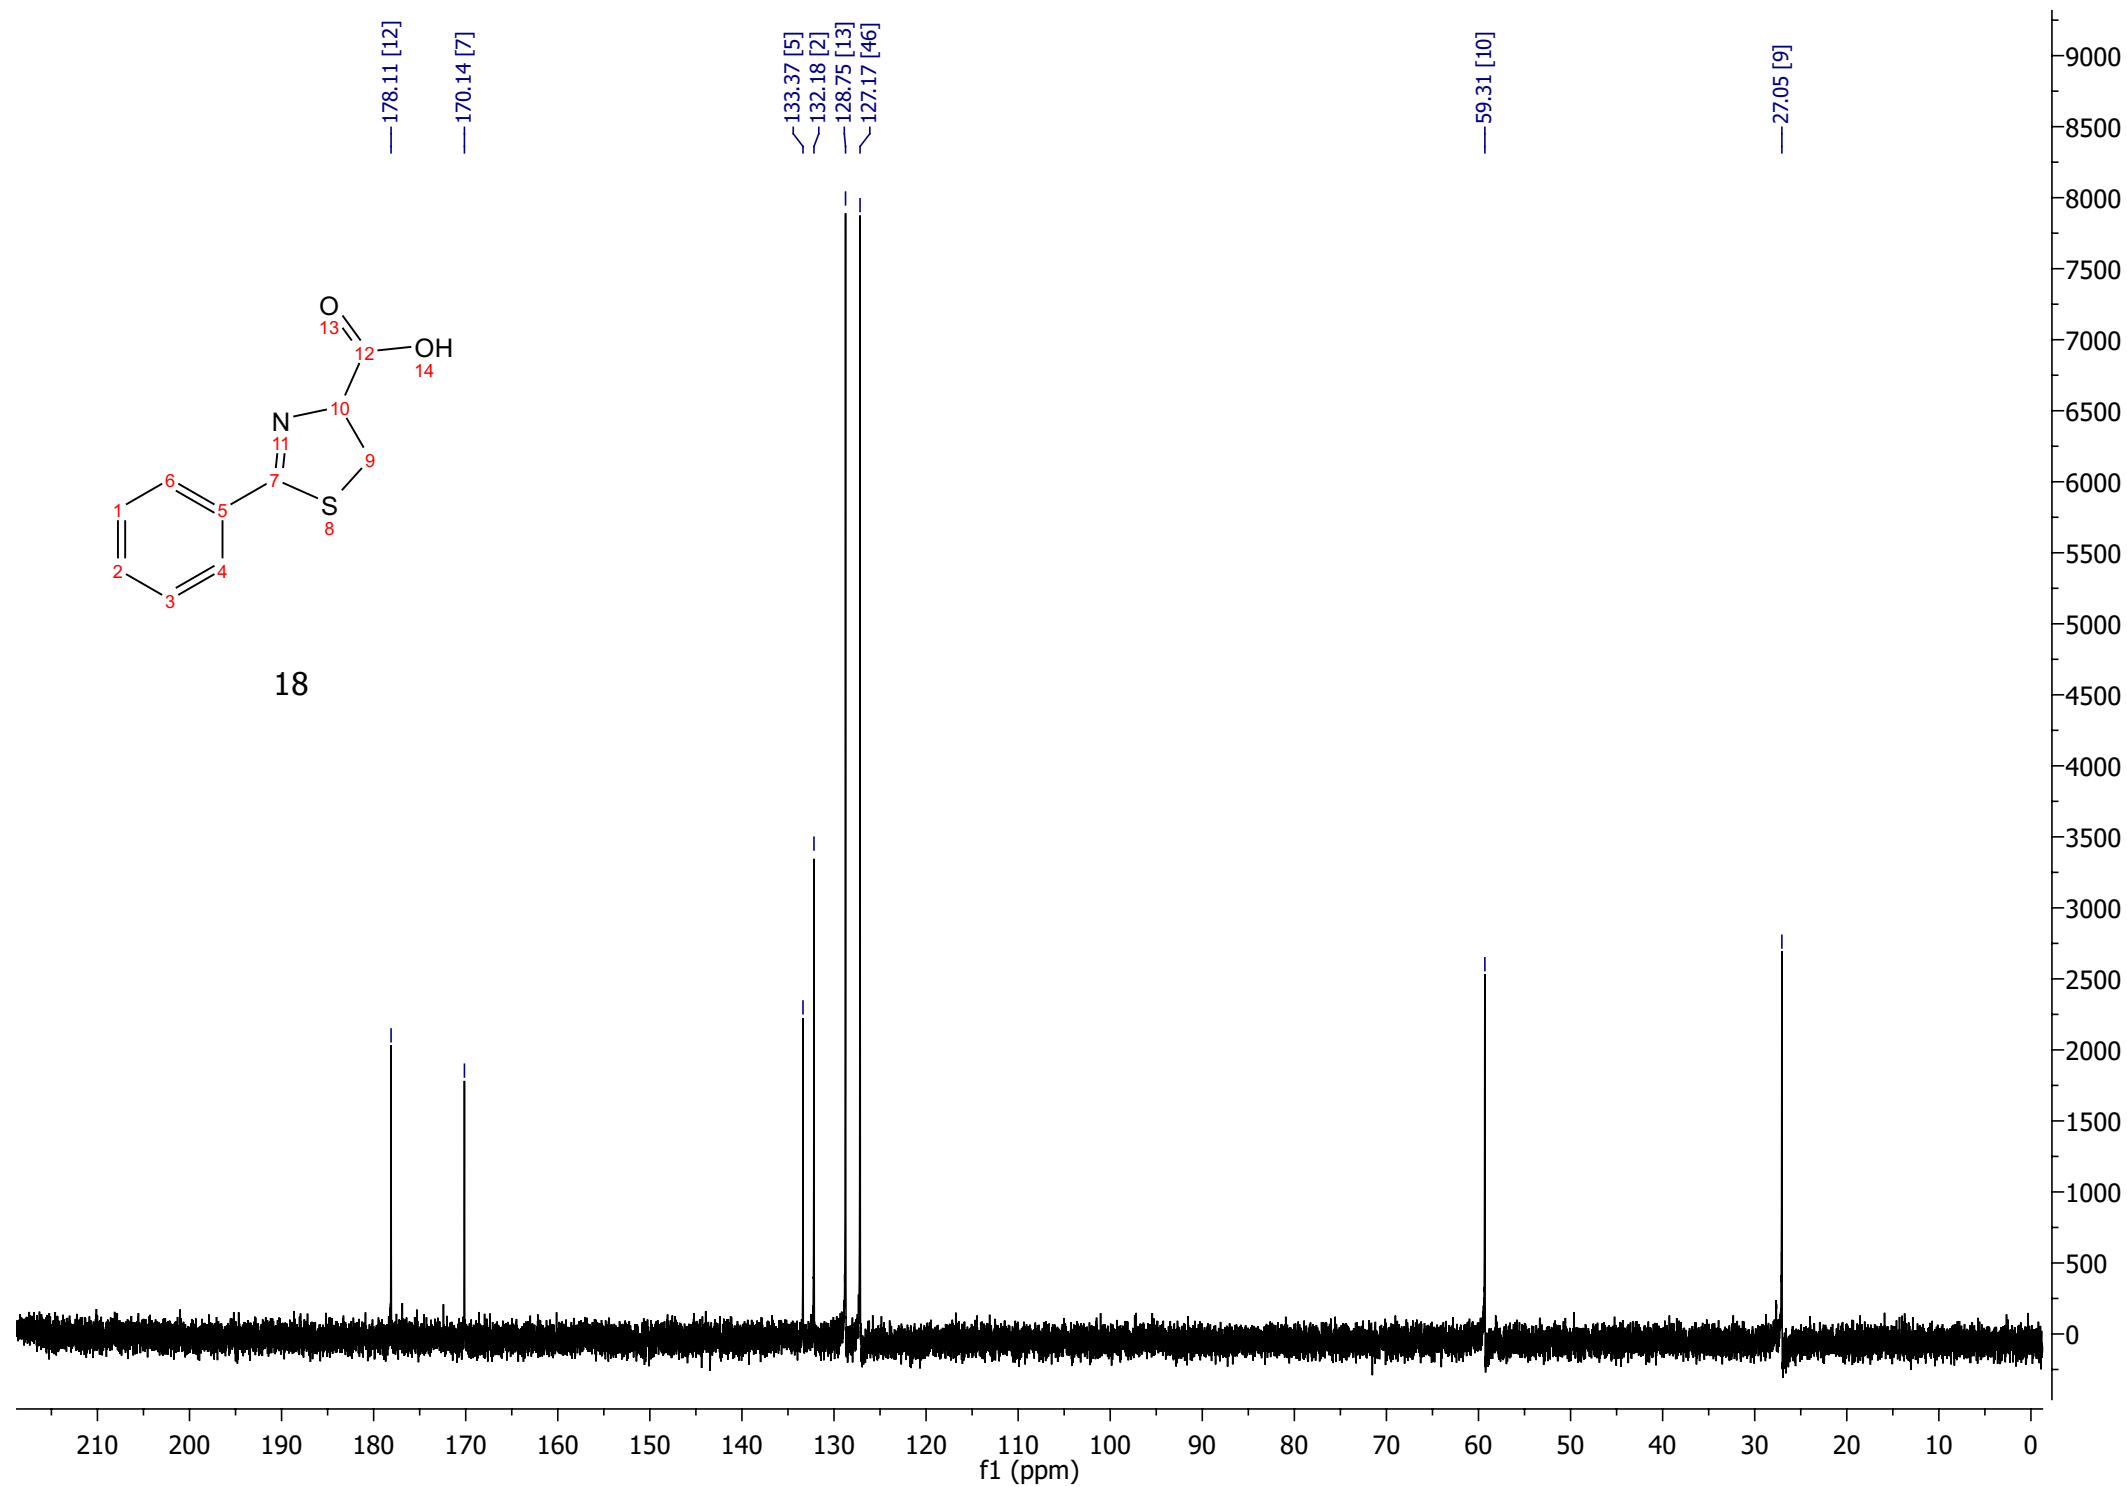

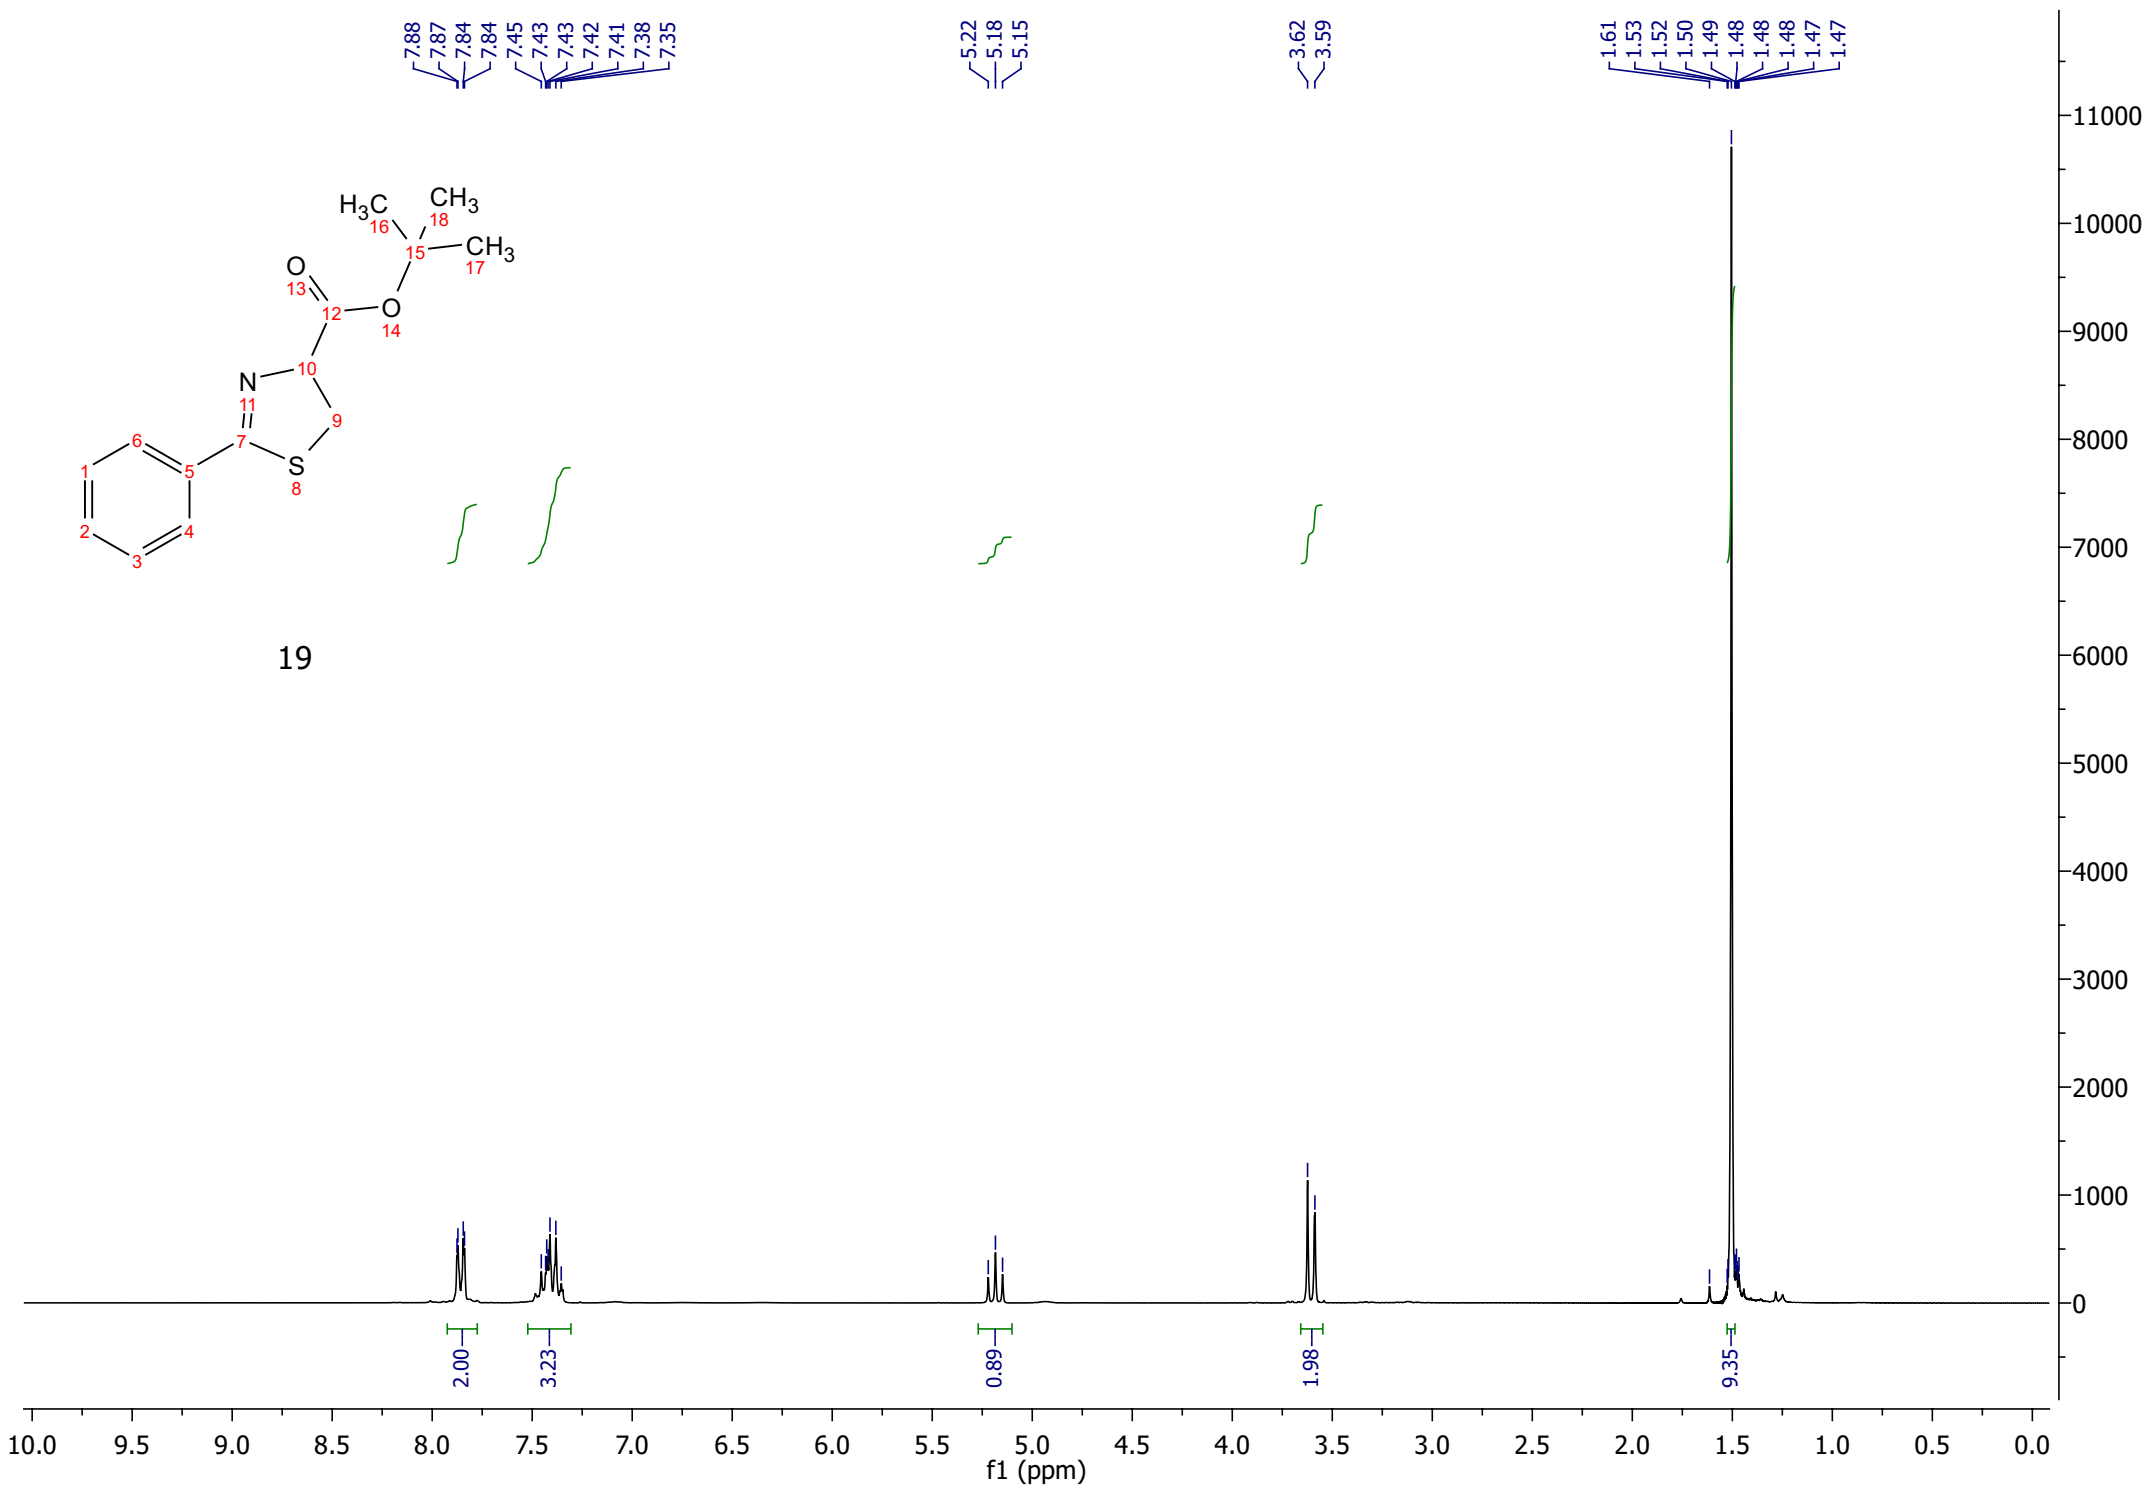

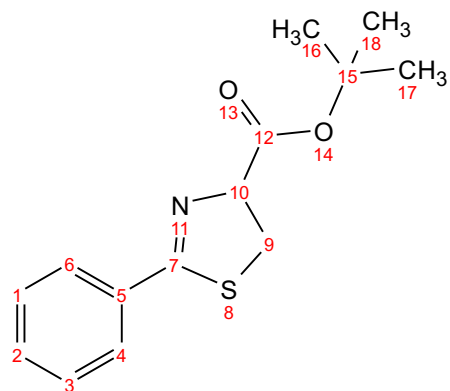

19

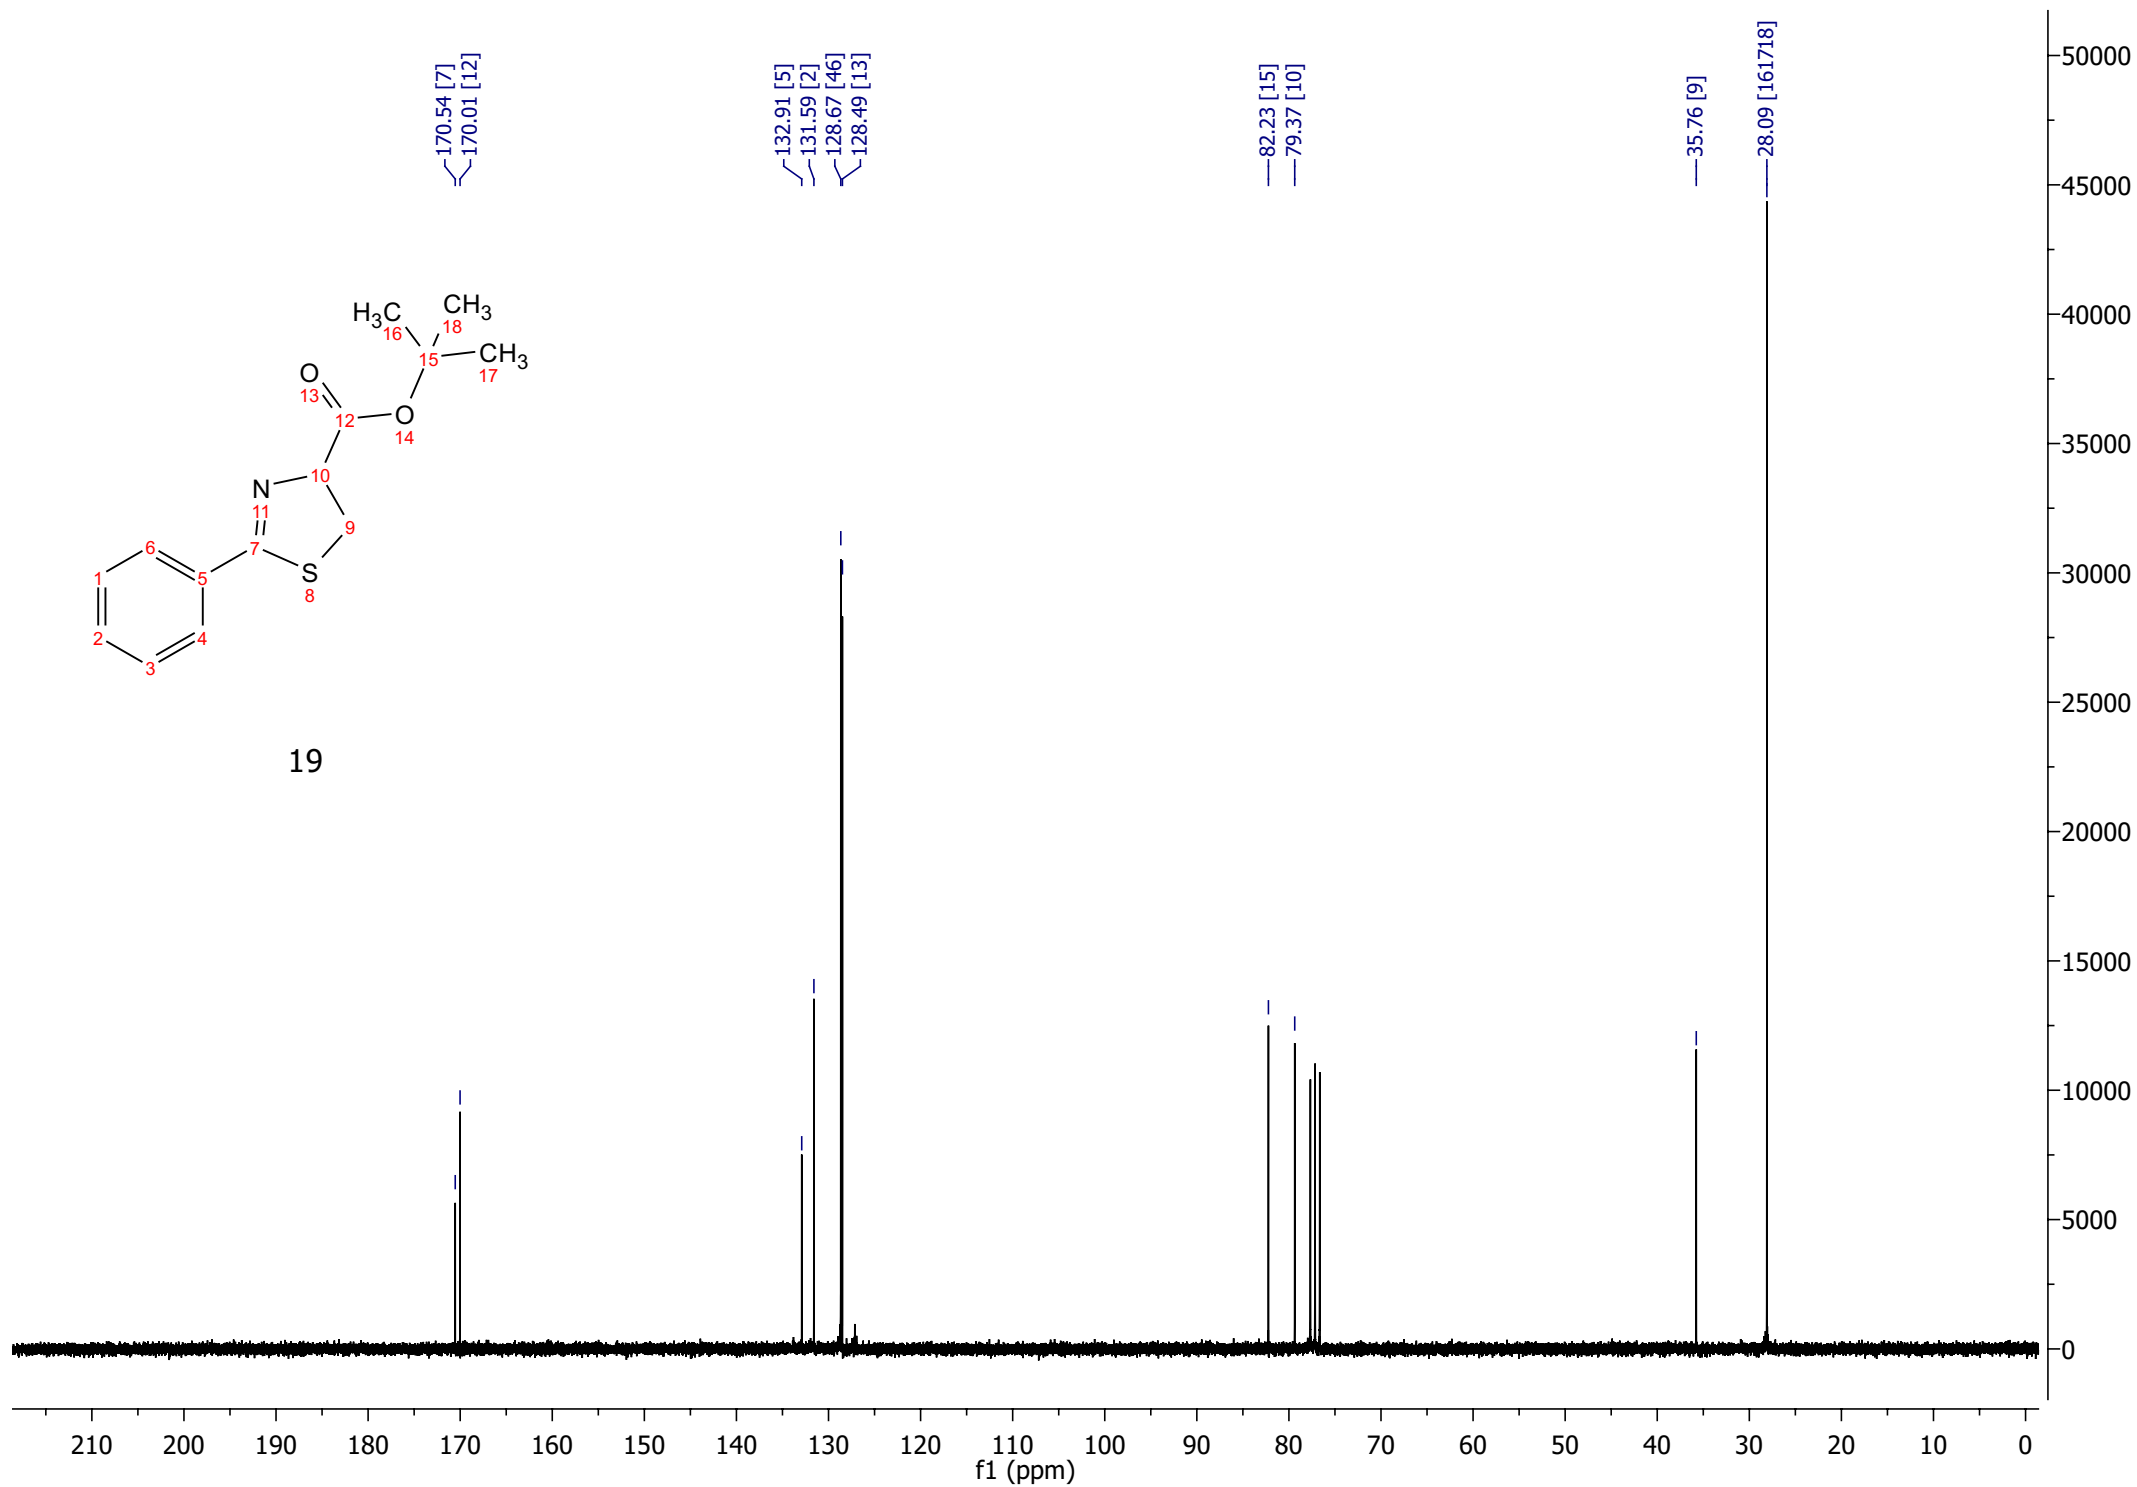

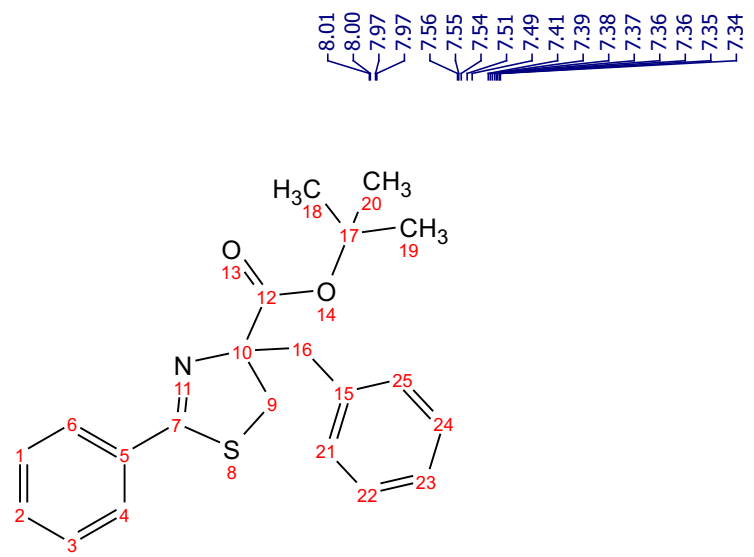

20

8.01  
8.00  
7.97  
7.97  
7.56  
7.55  
7.54  
7.51  
7.49  
7.41  
7.39  
7.38  
7.37  
7.36  
7.36  
7.35  
7.34

3.91  
3.86  
3.52  
3.48  
3.44  
3.43

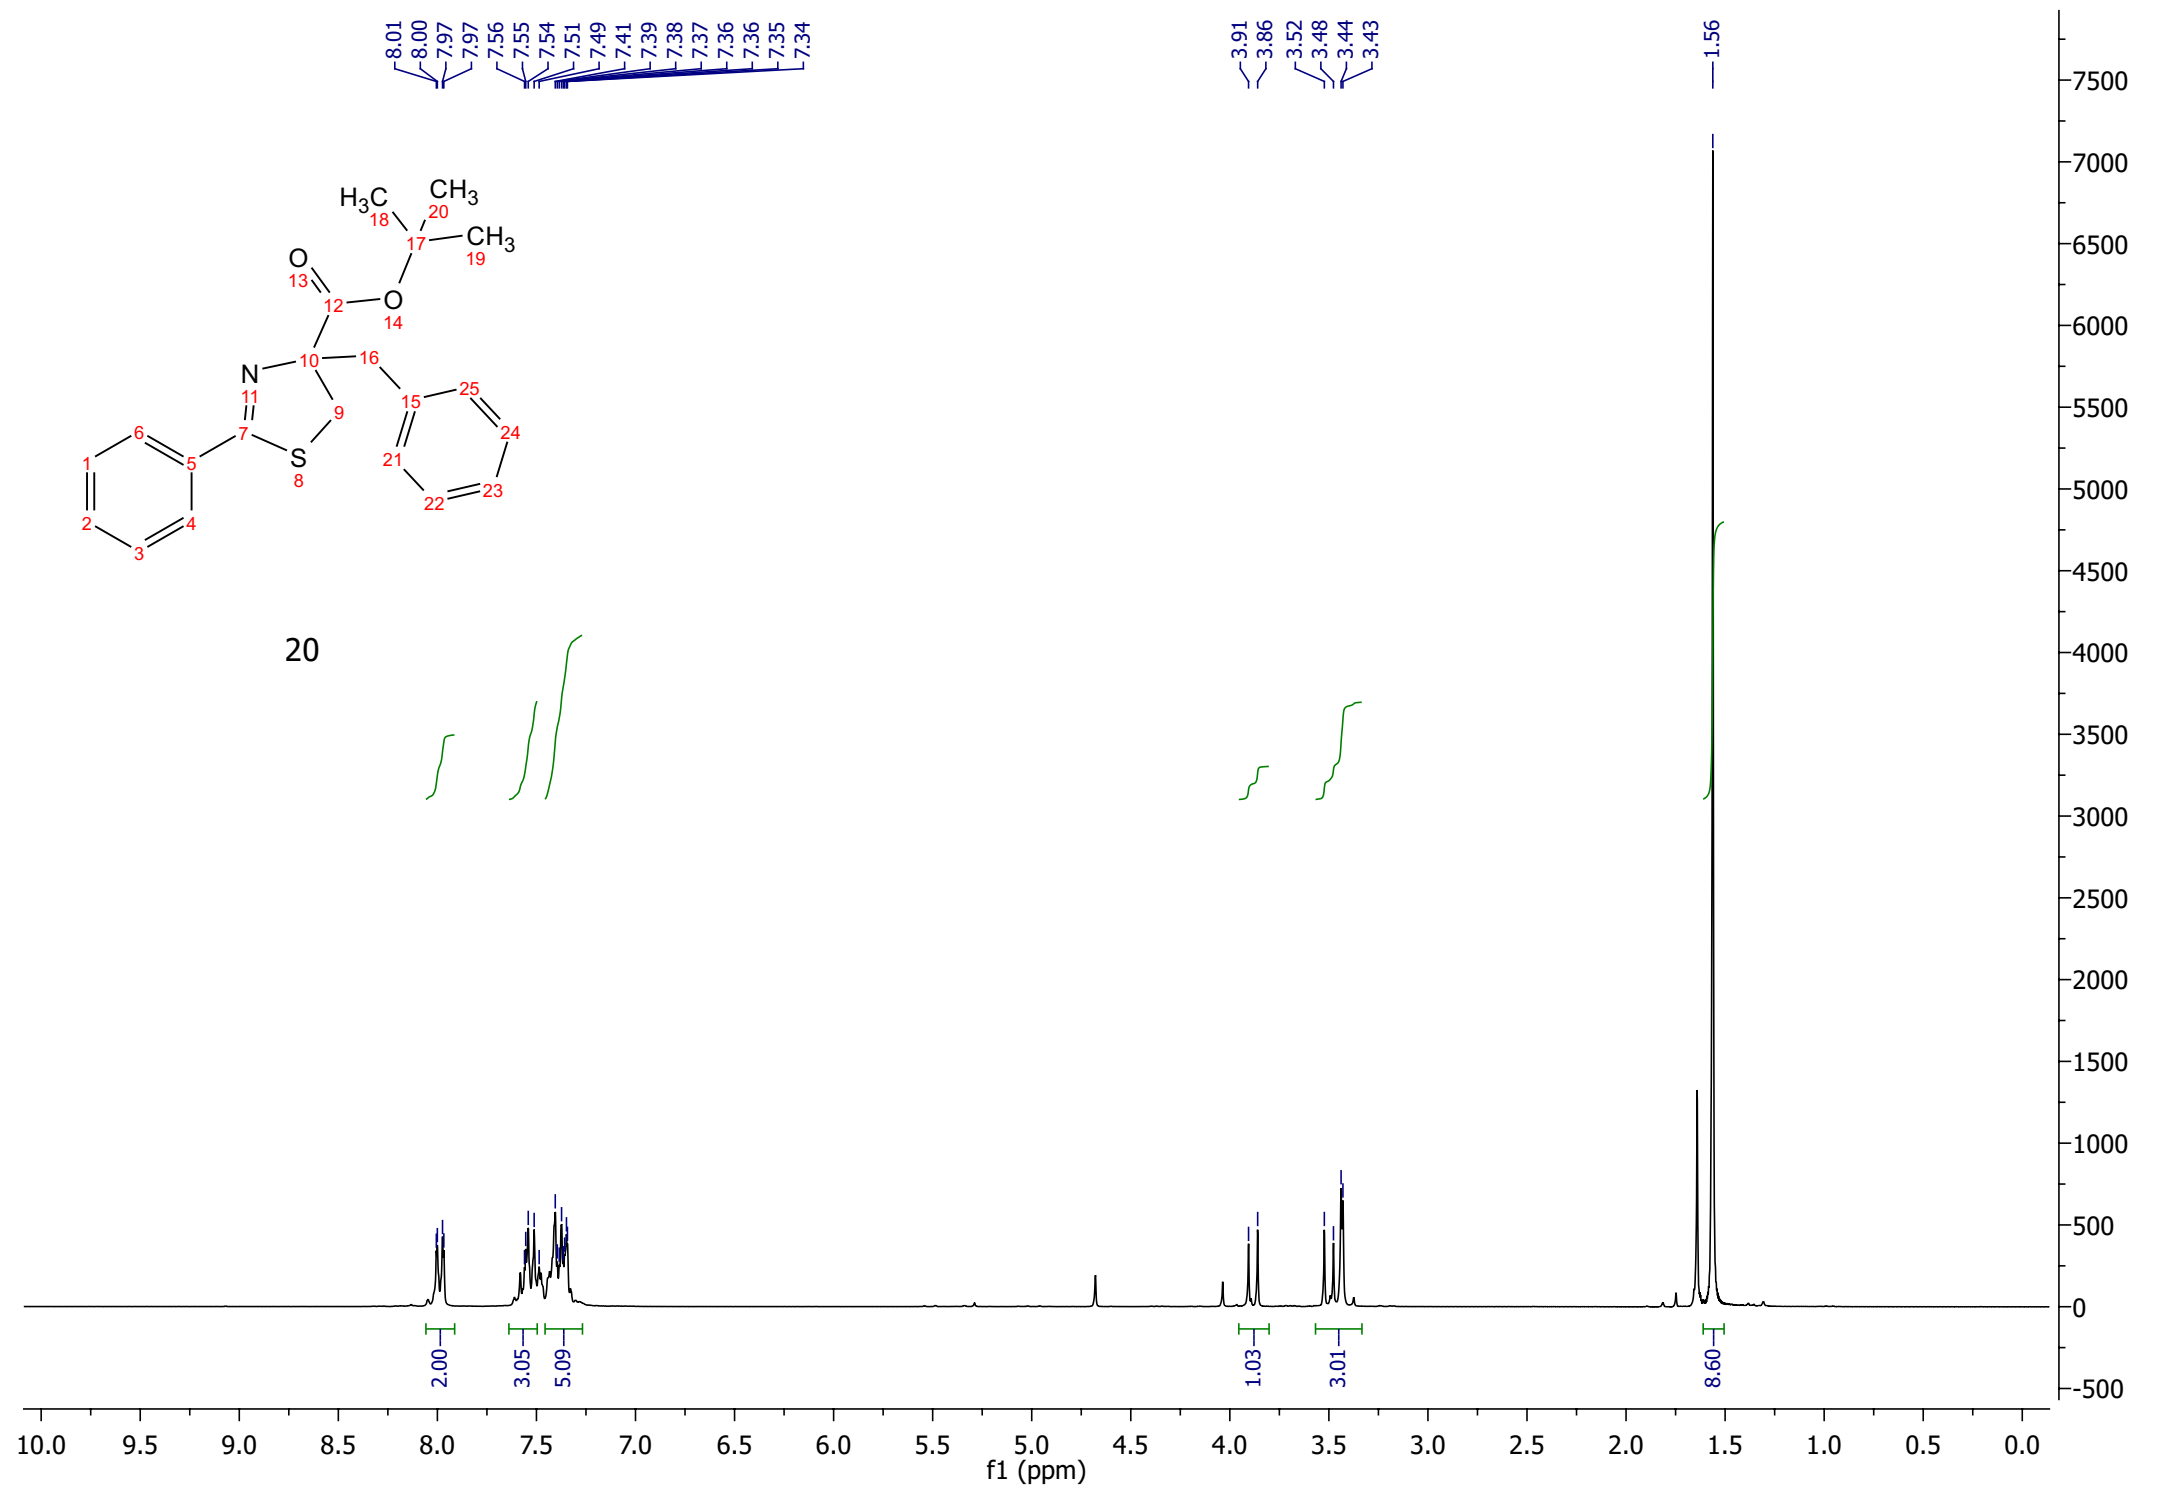



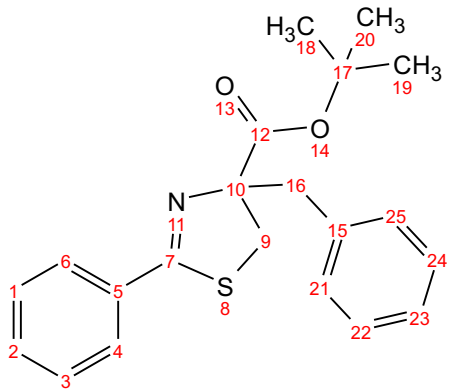

20

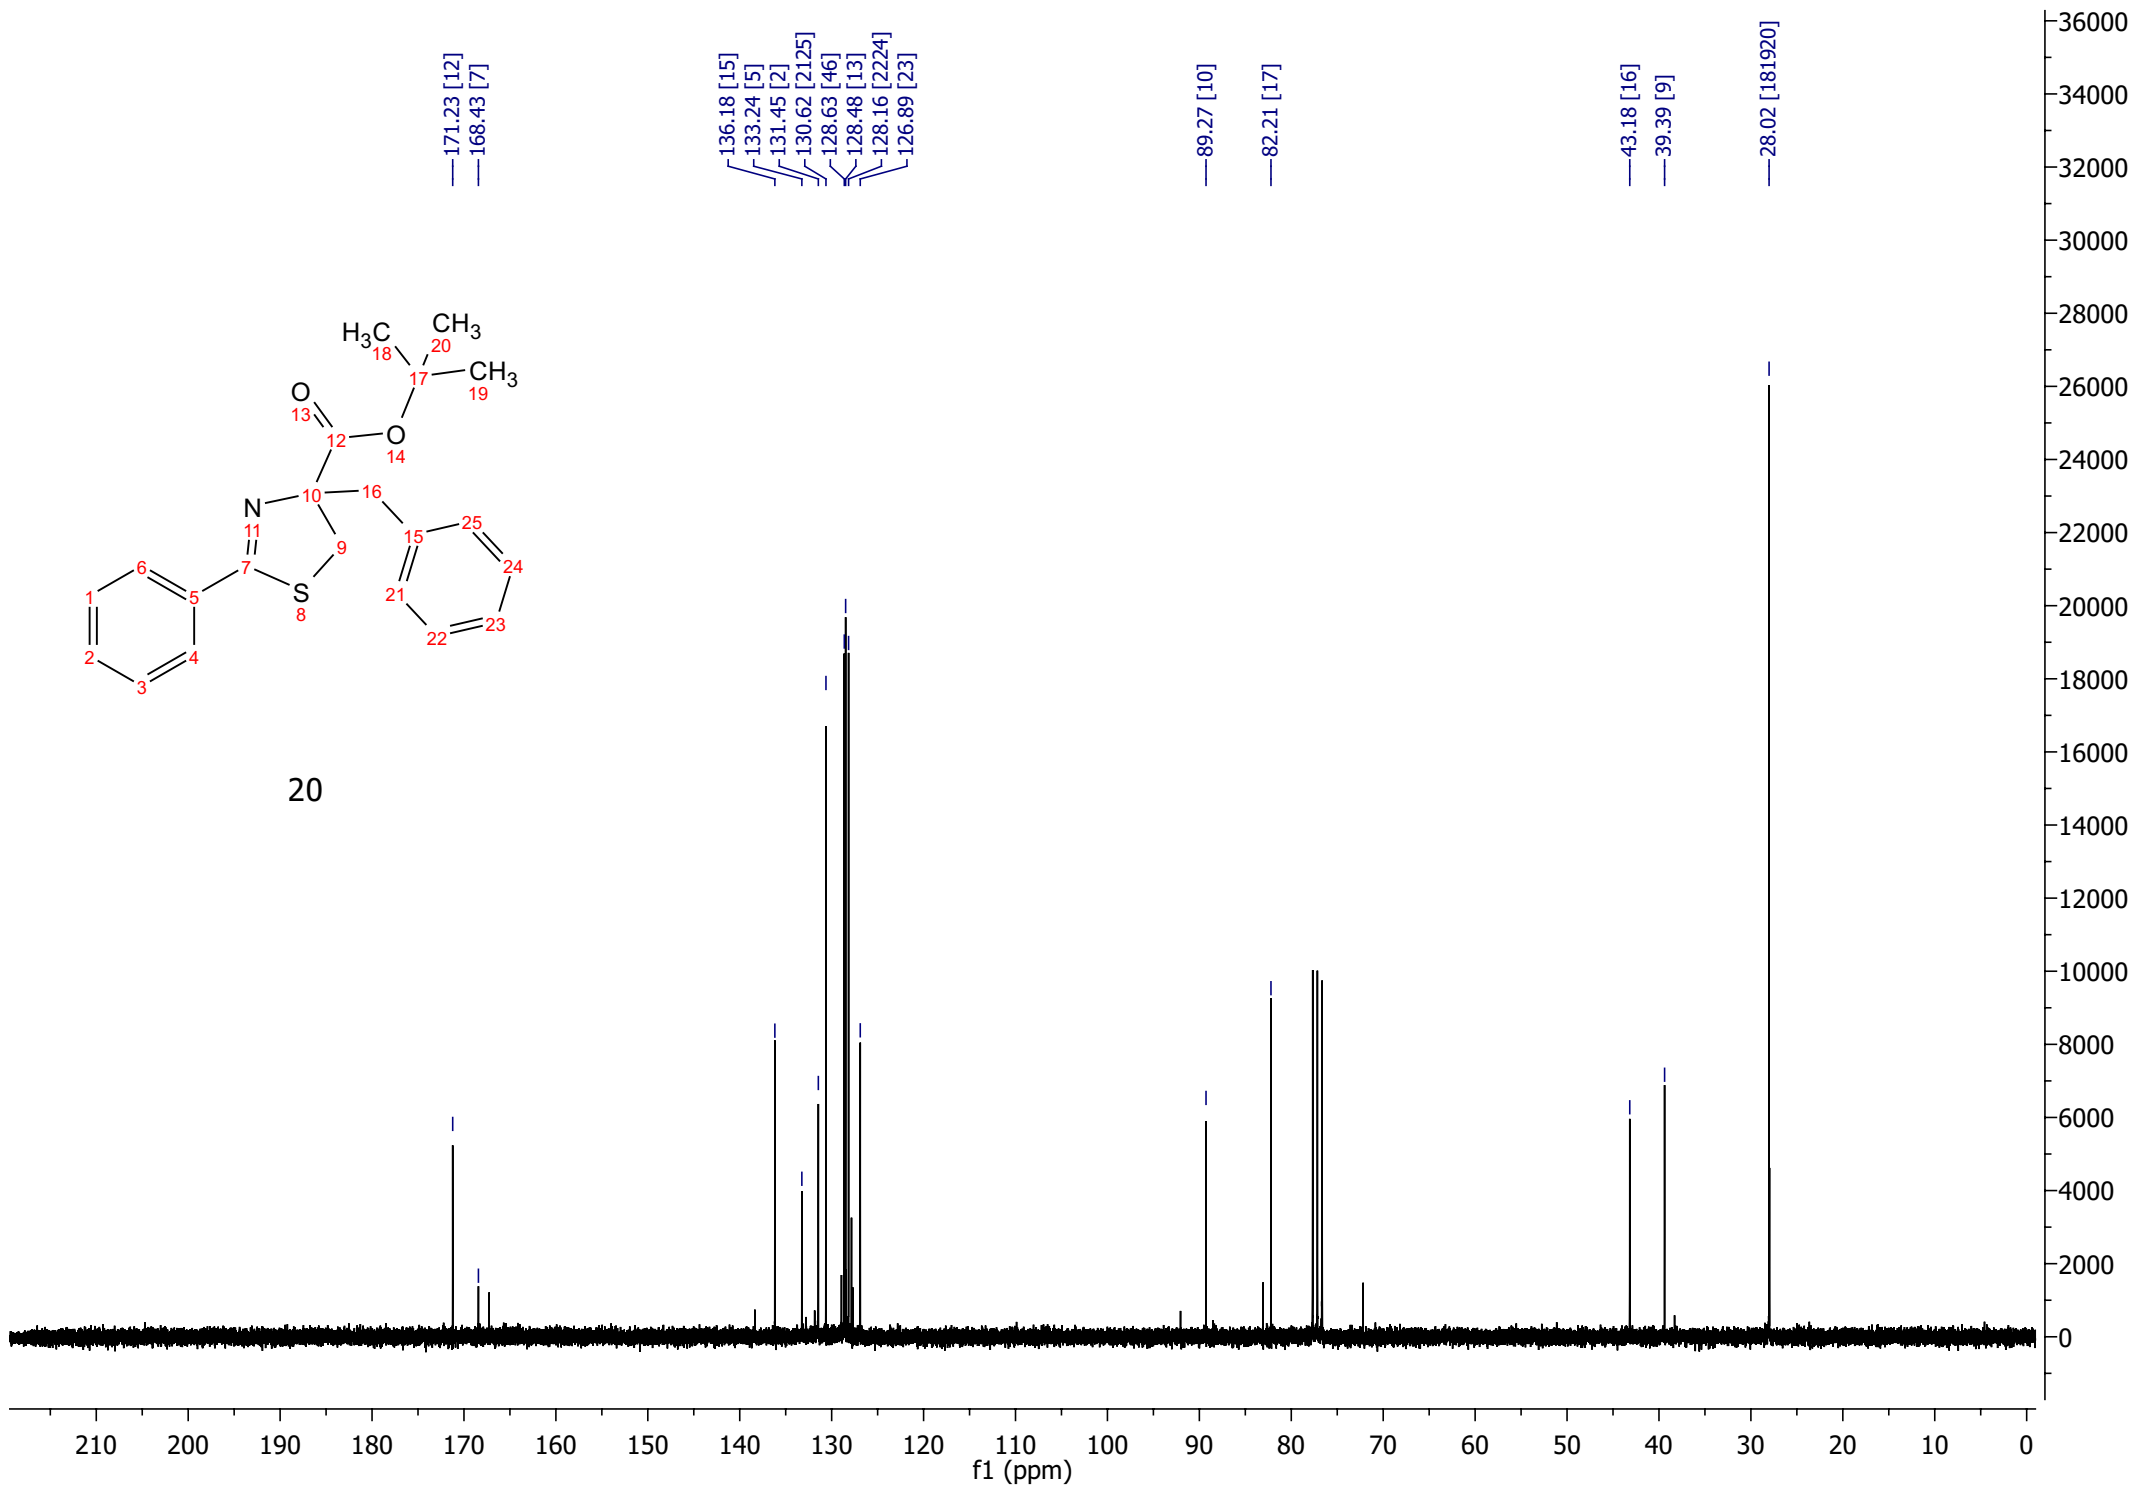

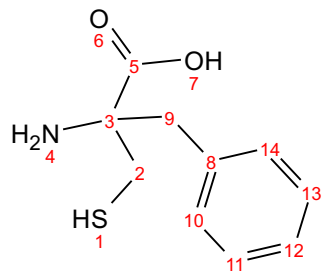

5

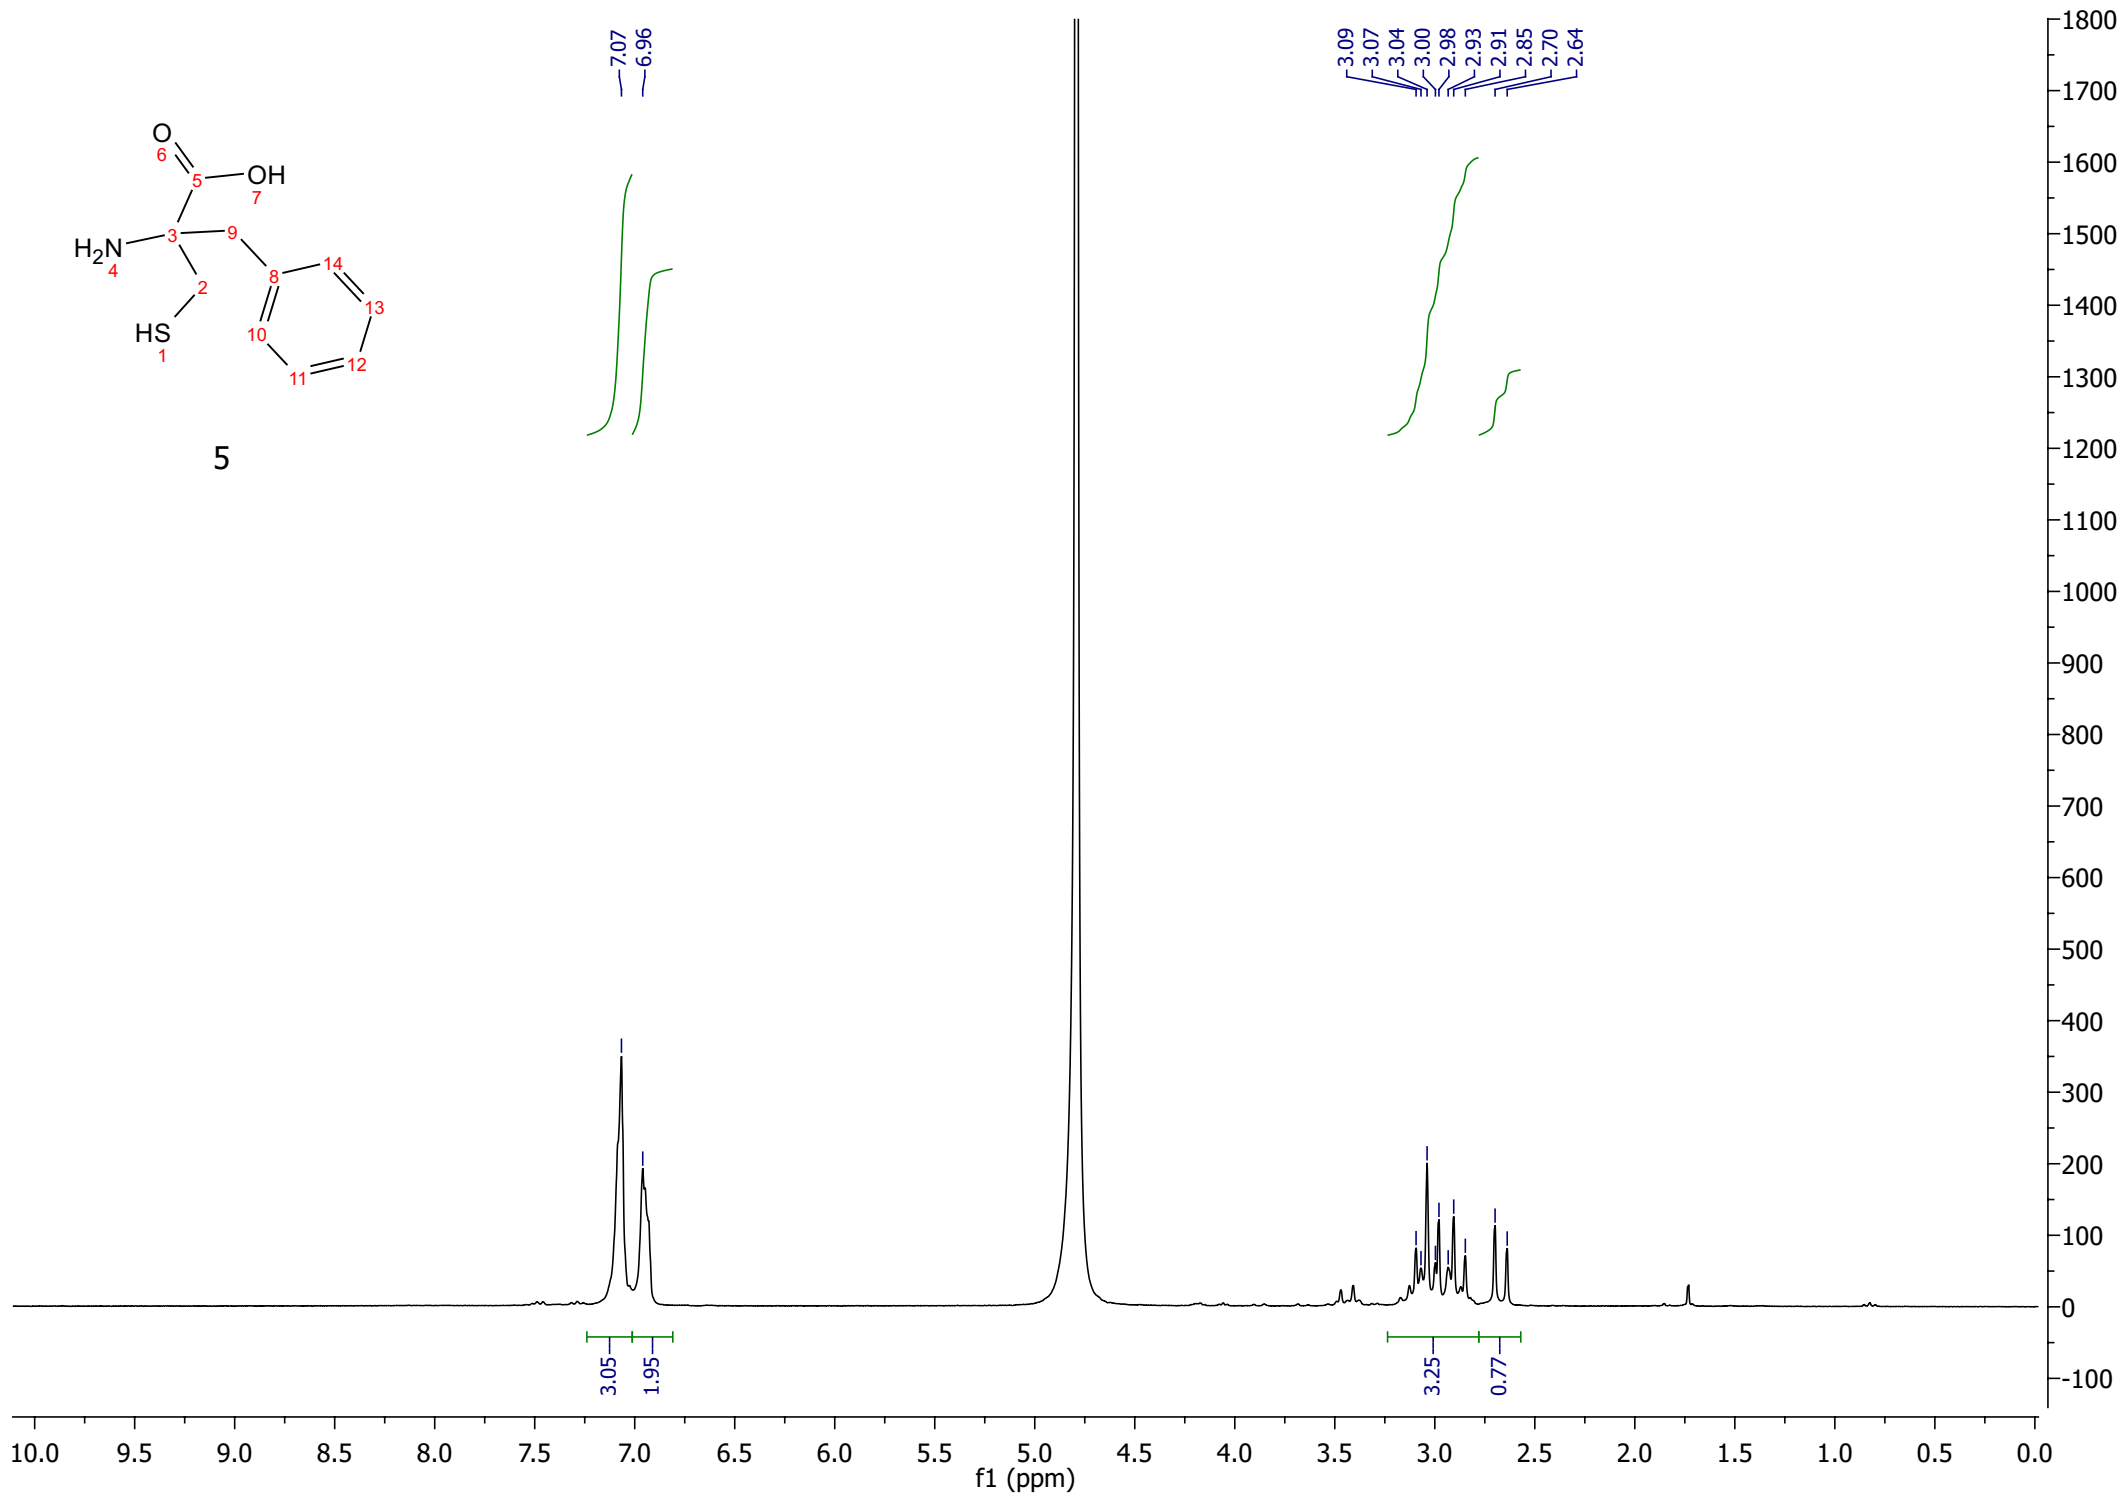

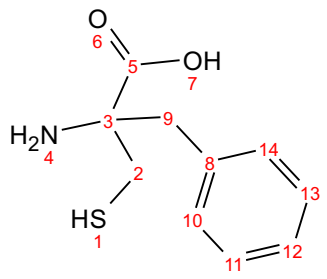

5

— 171.07 [5]

131.96 [8]  
129.91 [1014]  
128.98 [1113]  
128.18 [12]

— 65.48 [3]

— 40.41 [9]

— 28.74 [2]

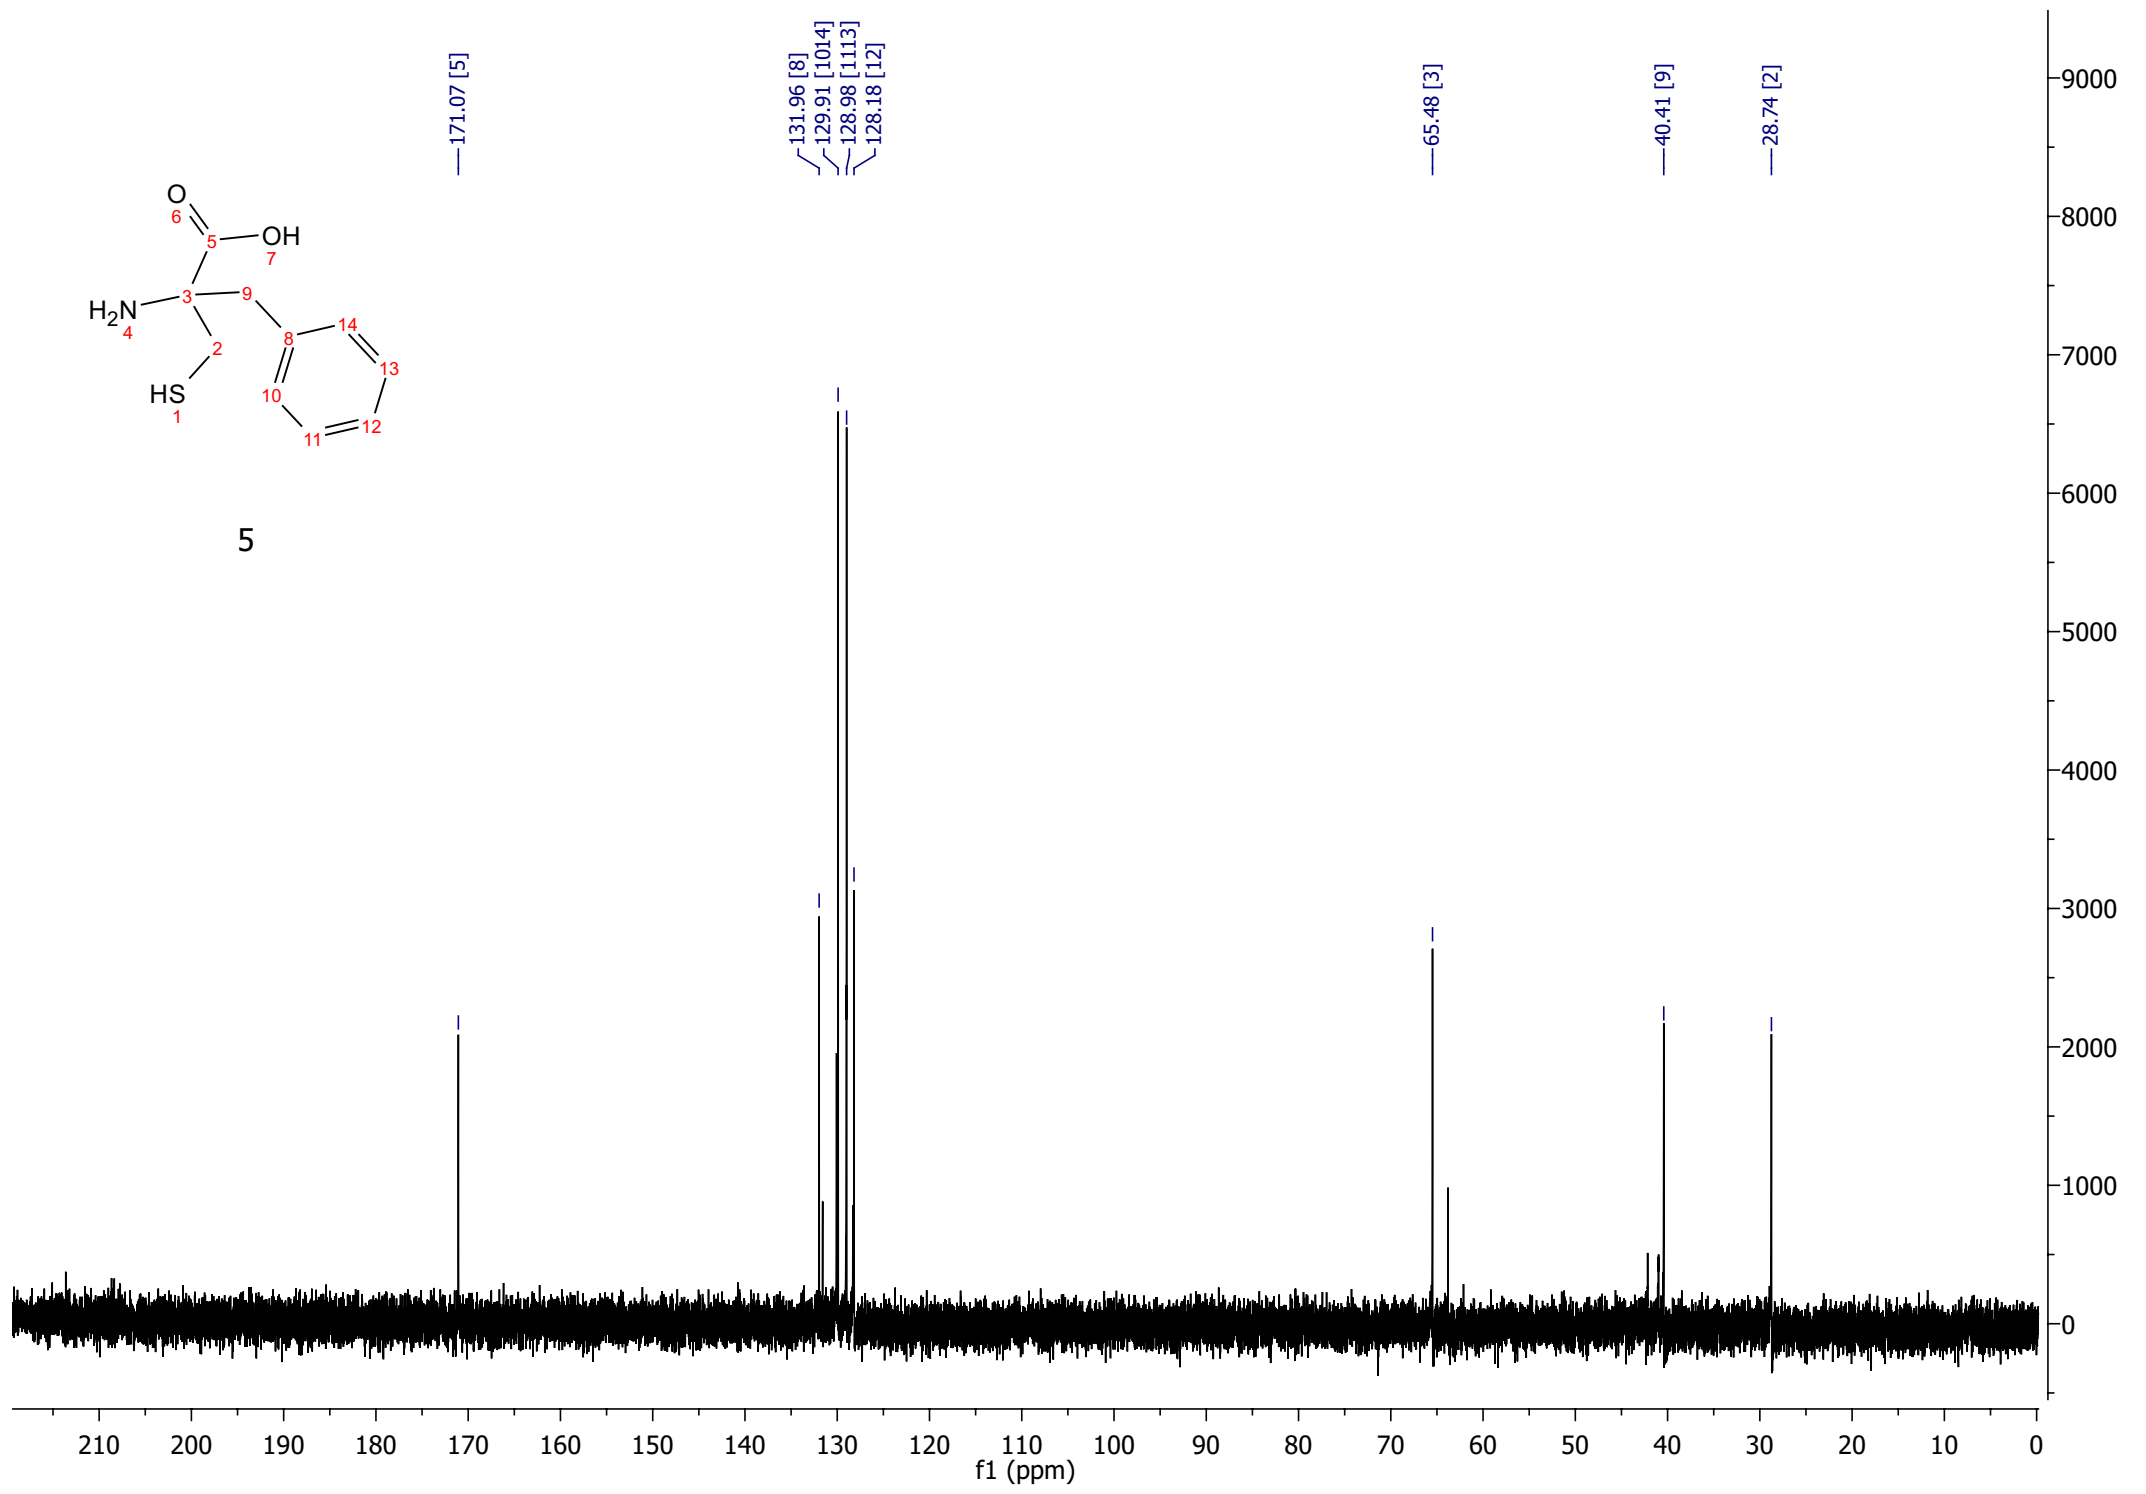

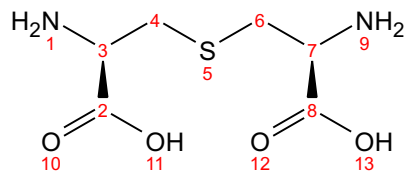

1

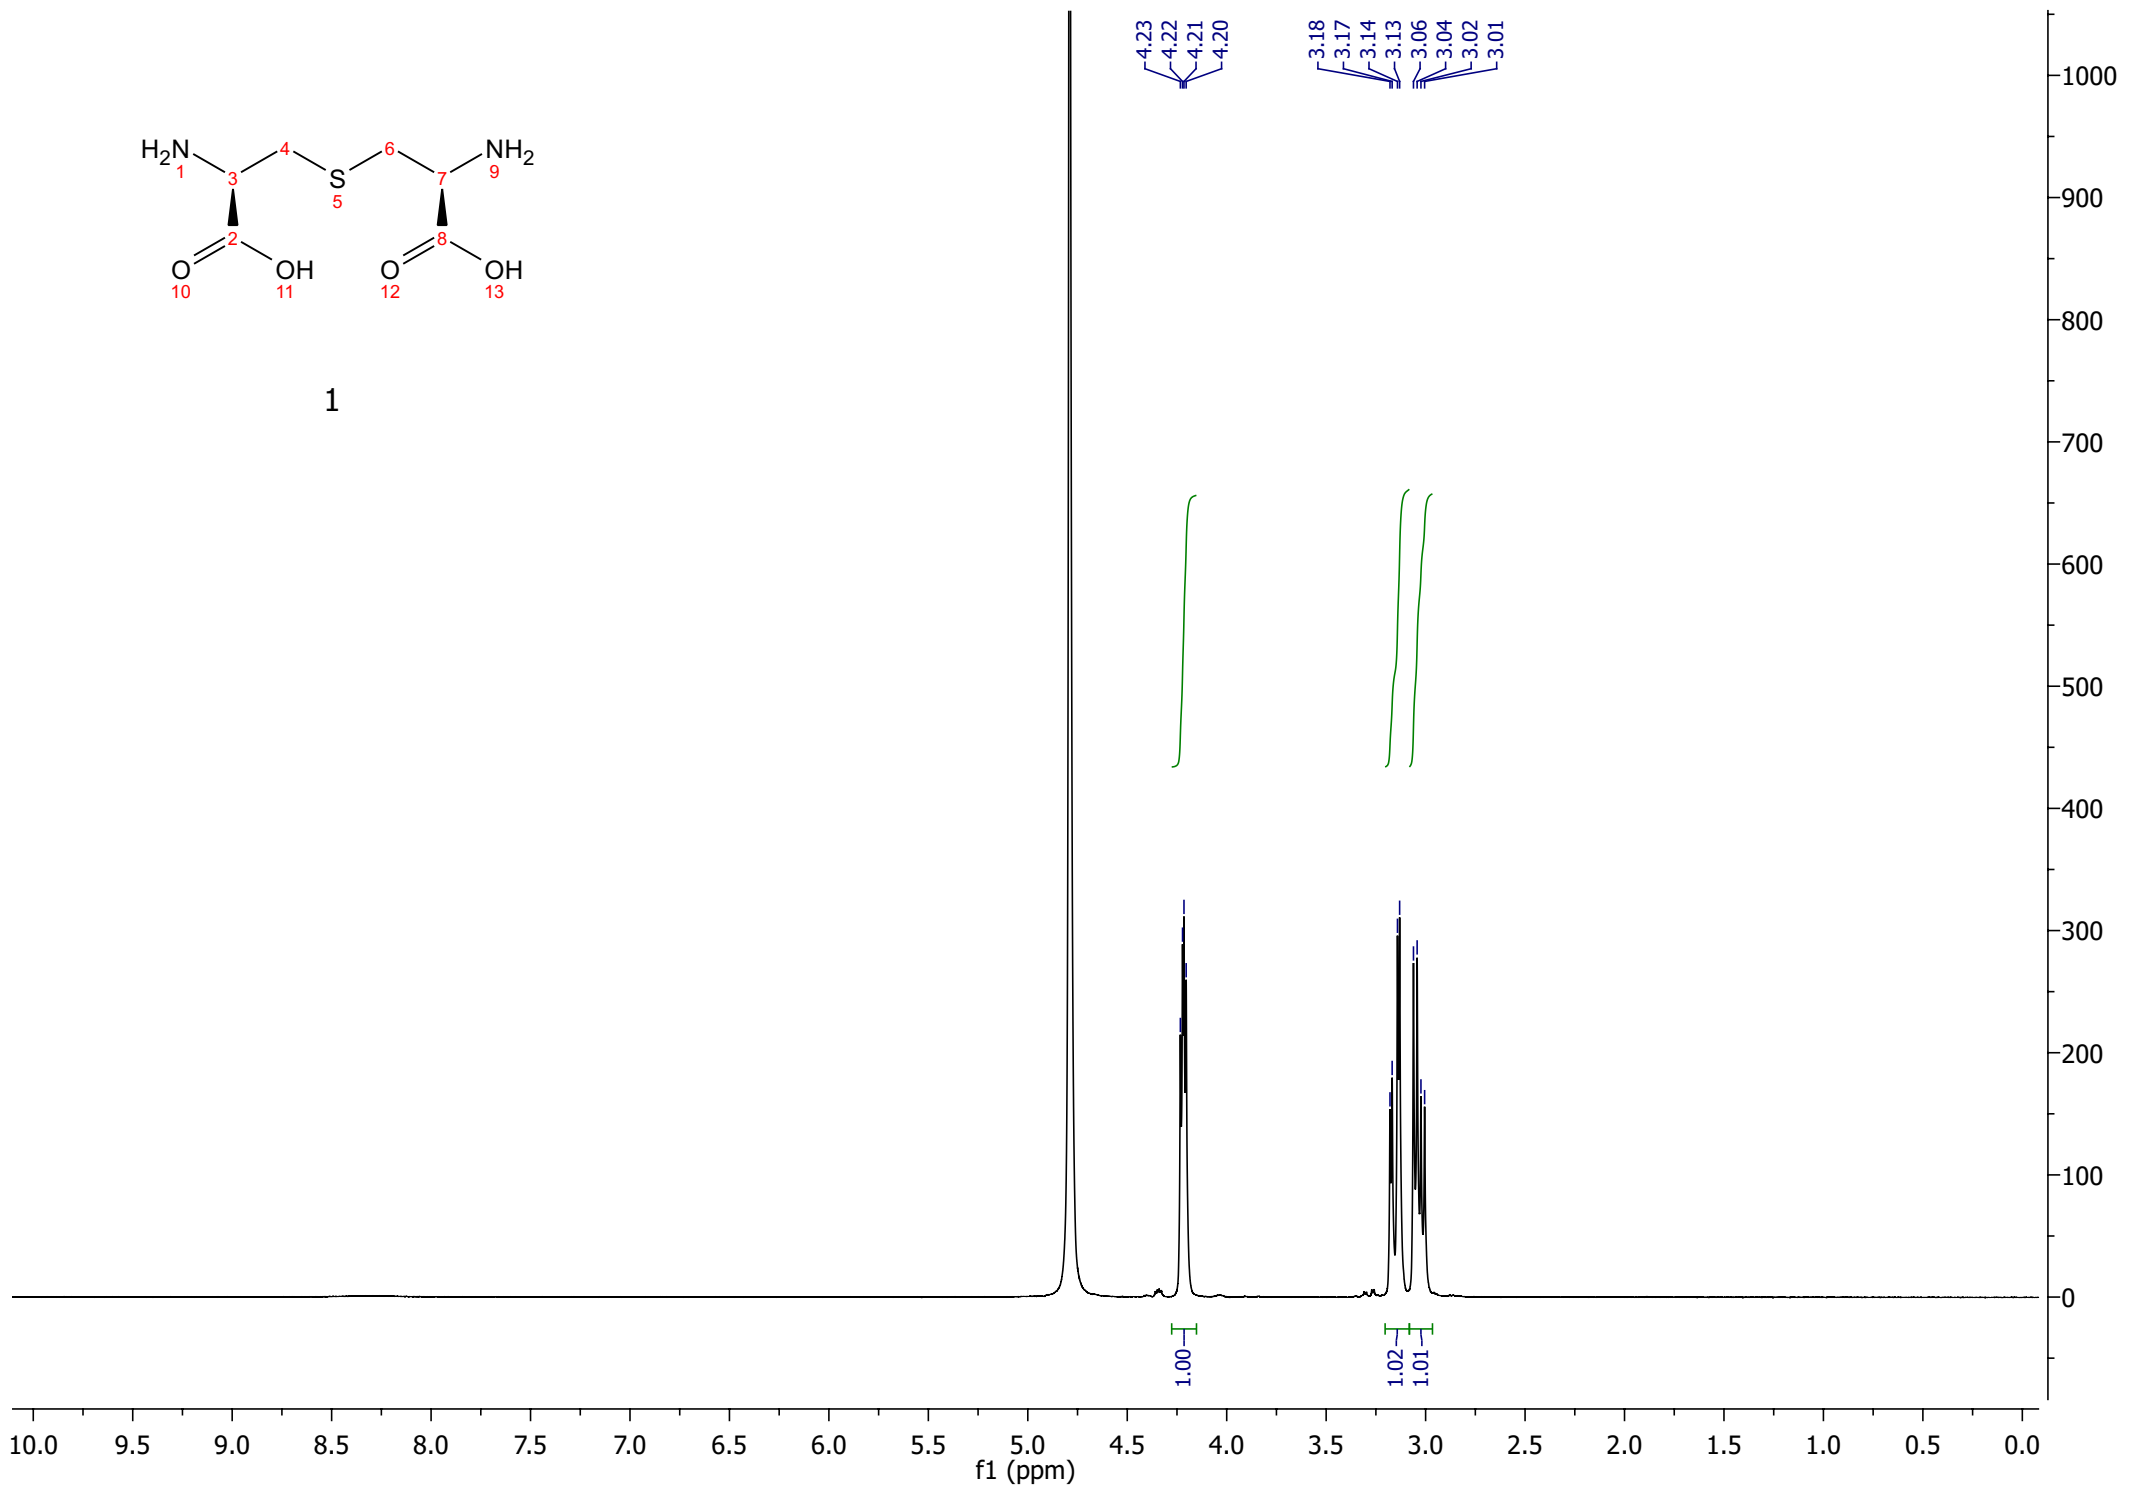

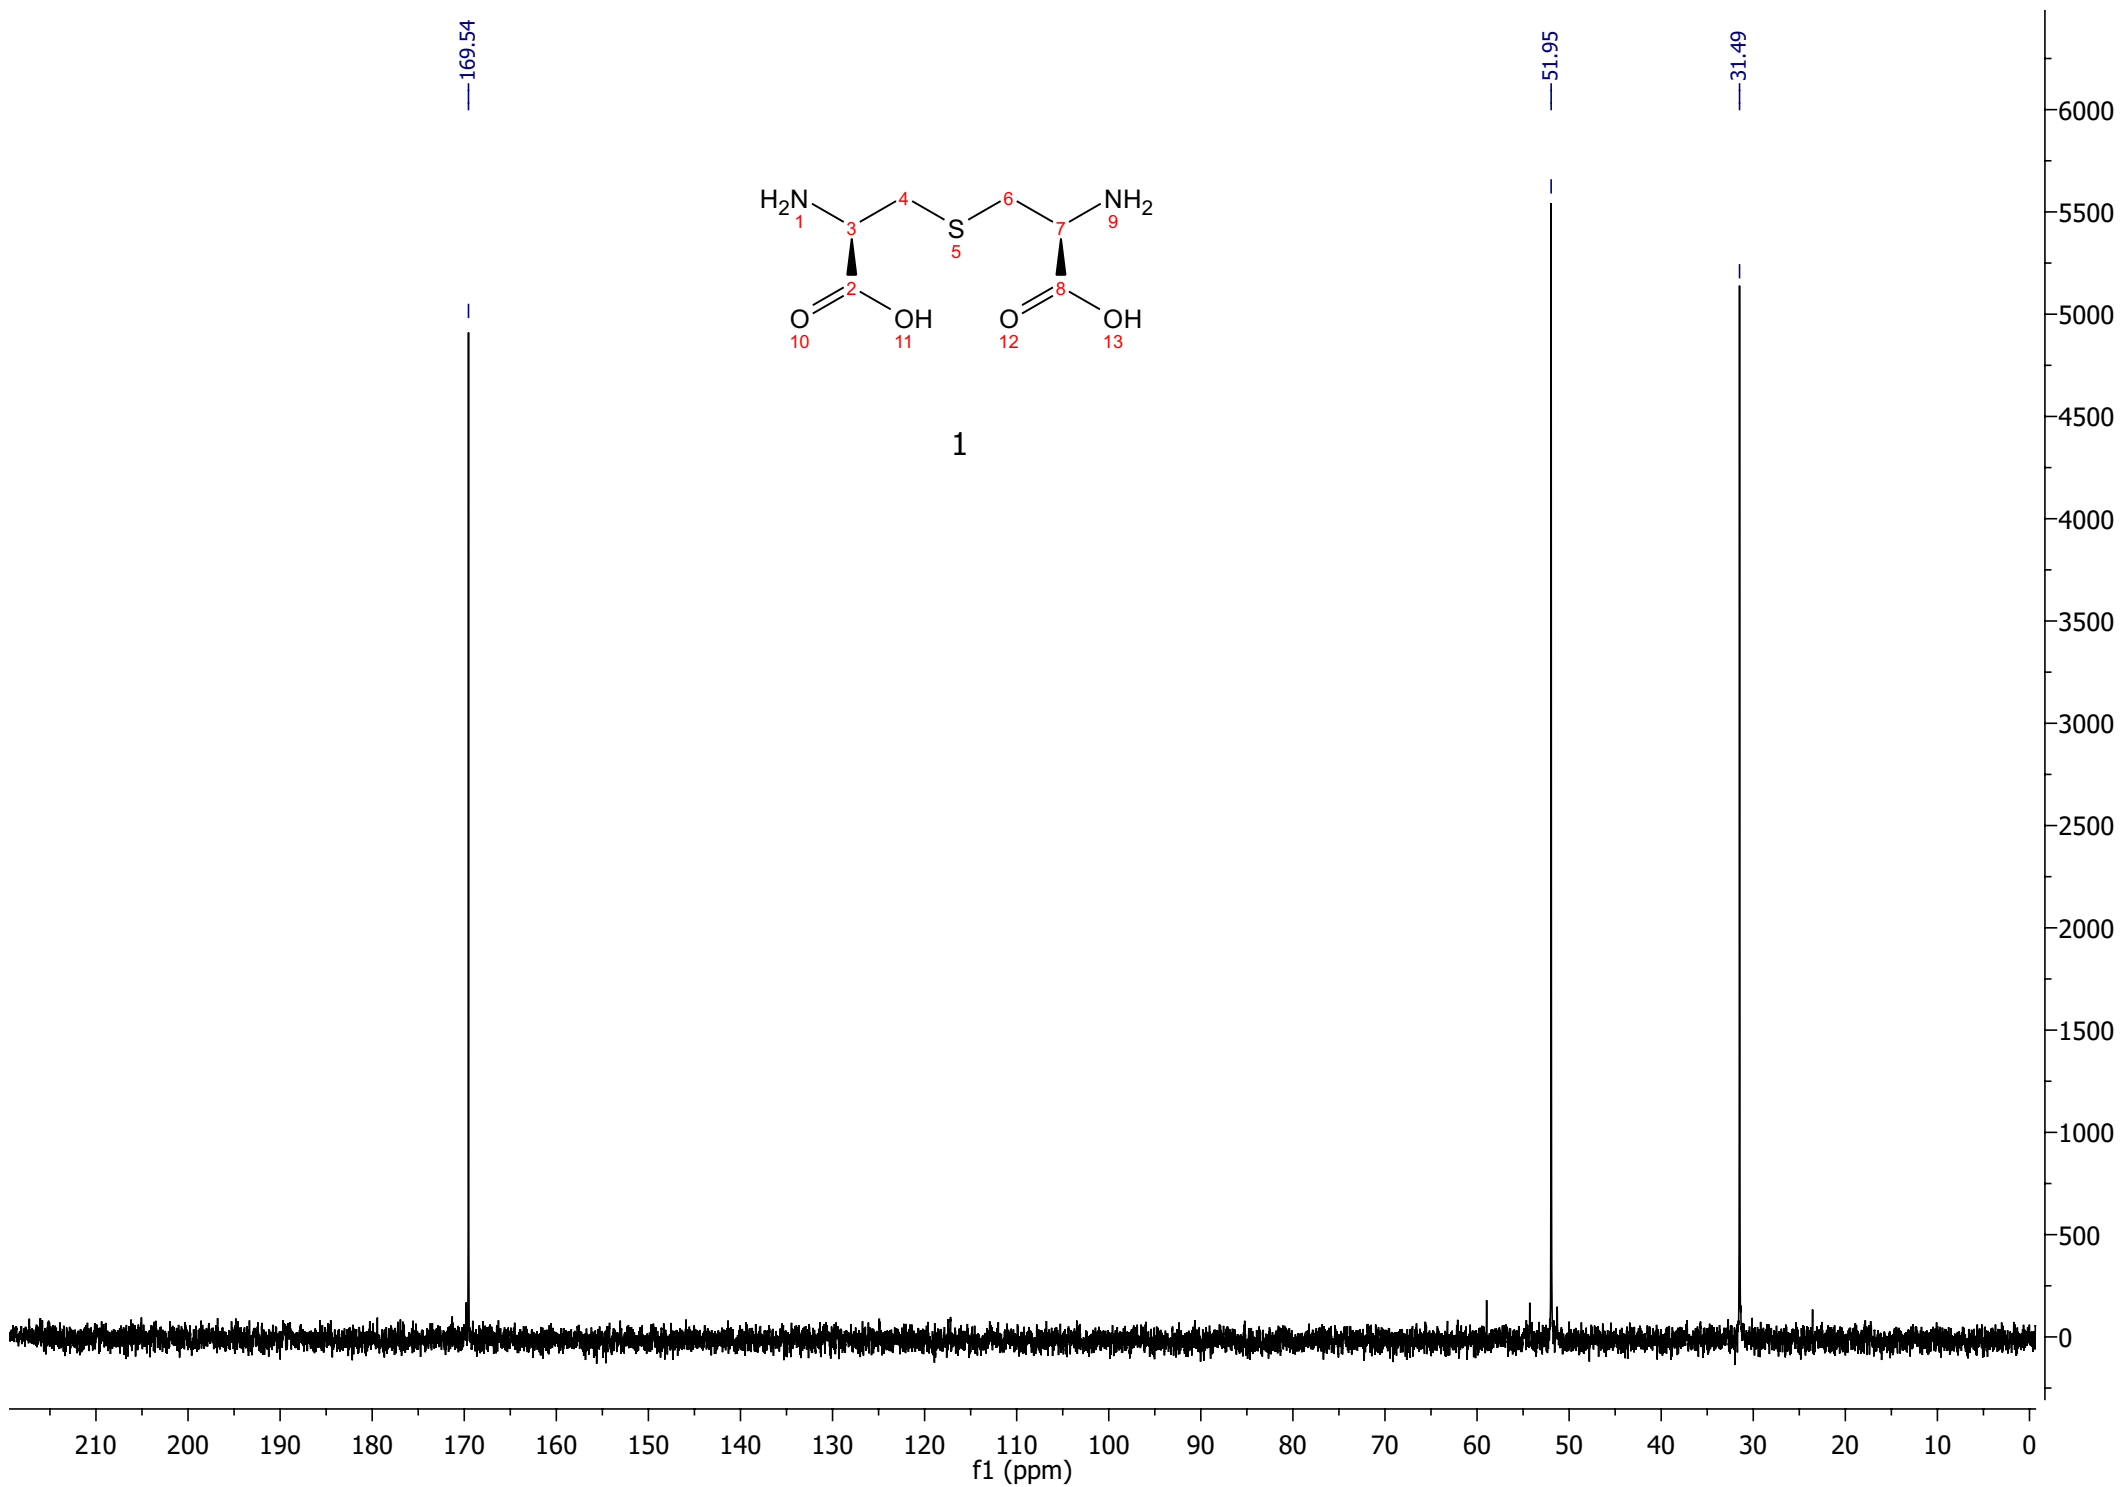

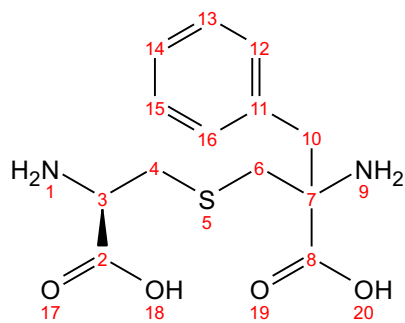

3

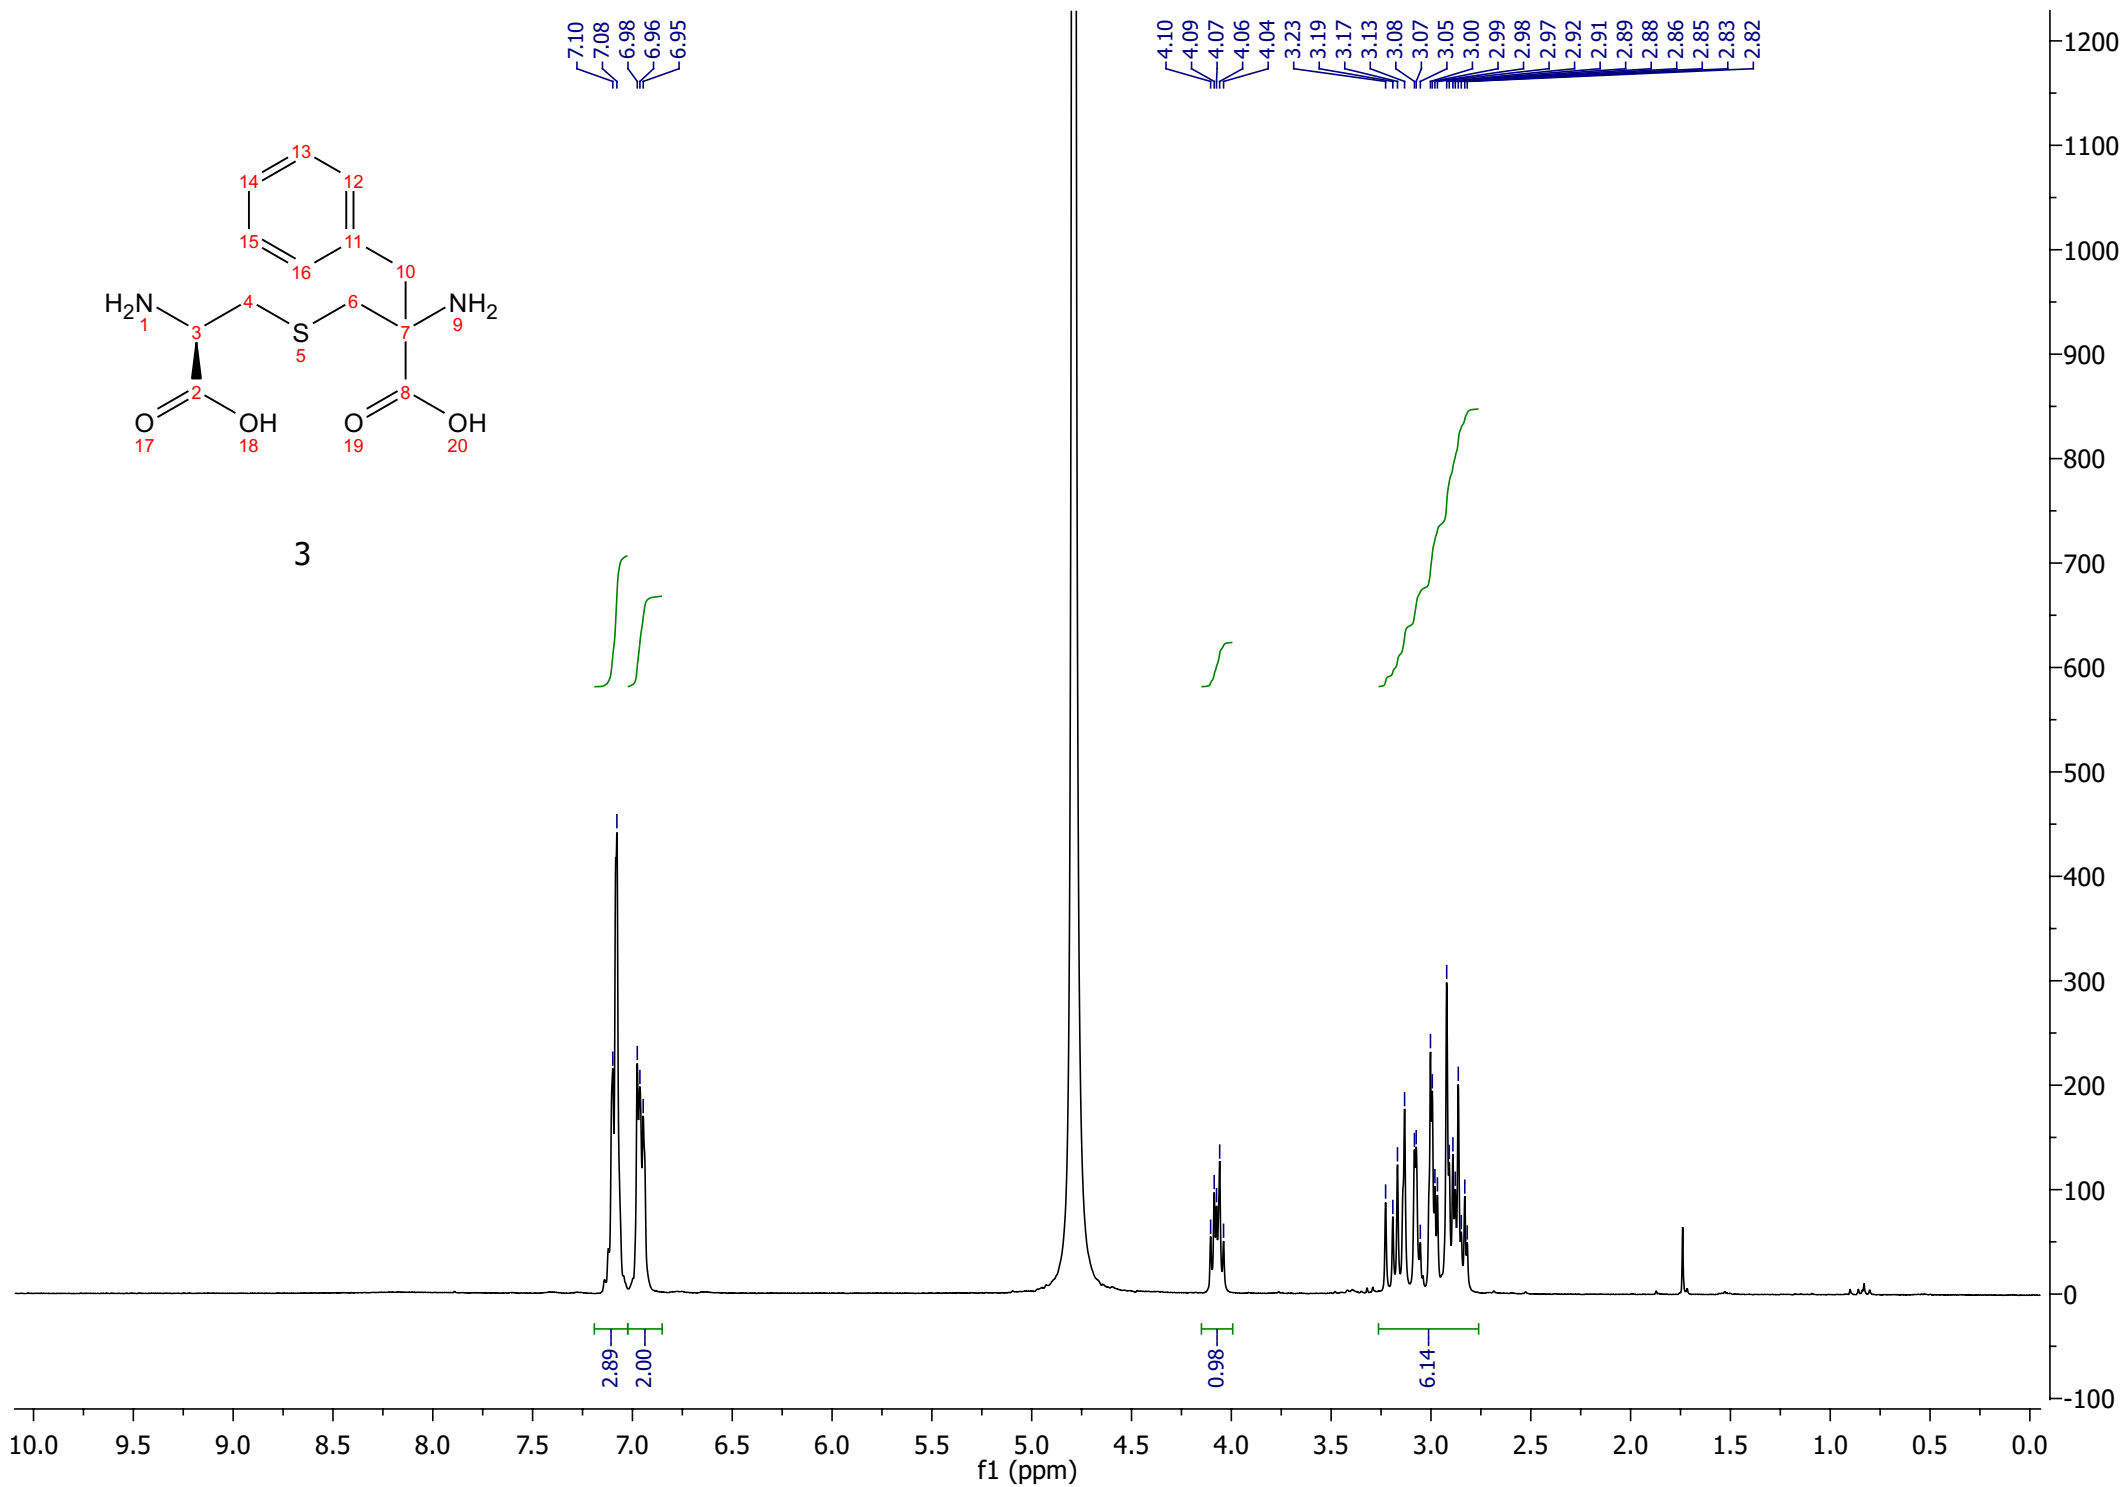

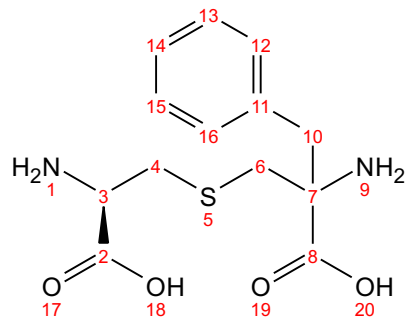

3

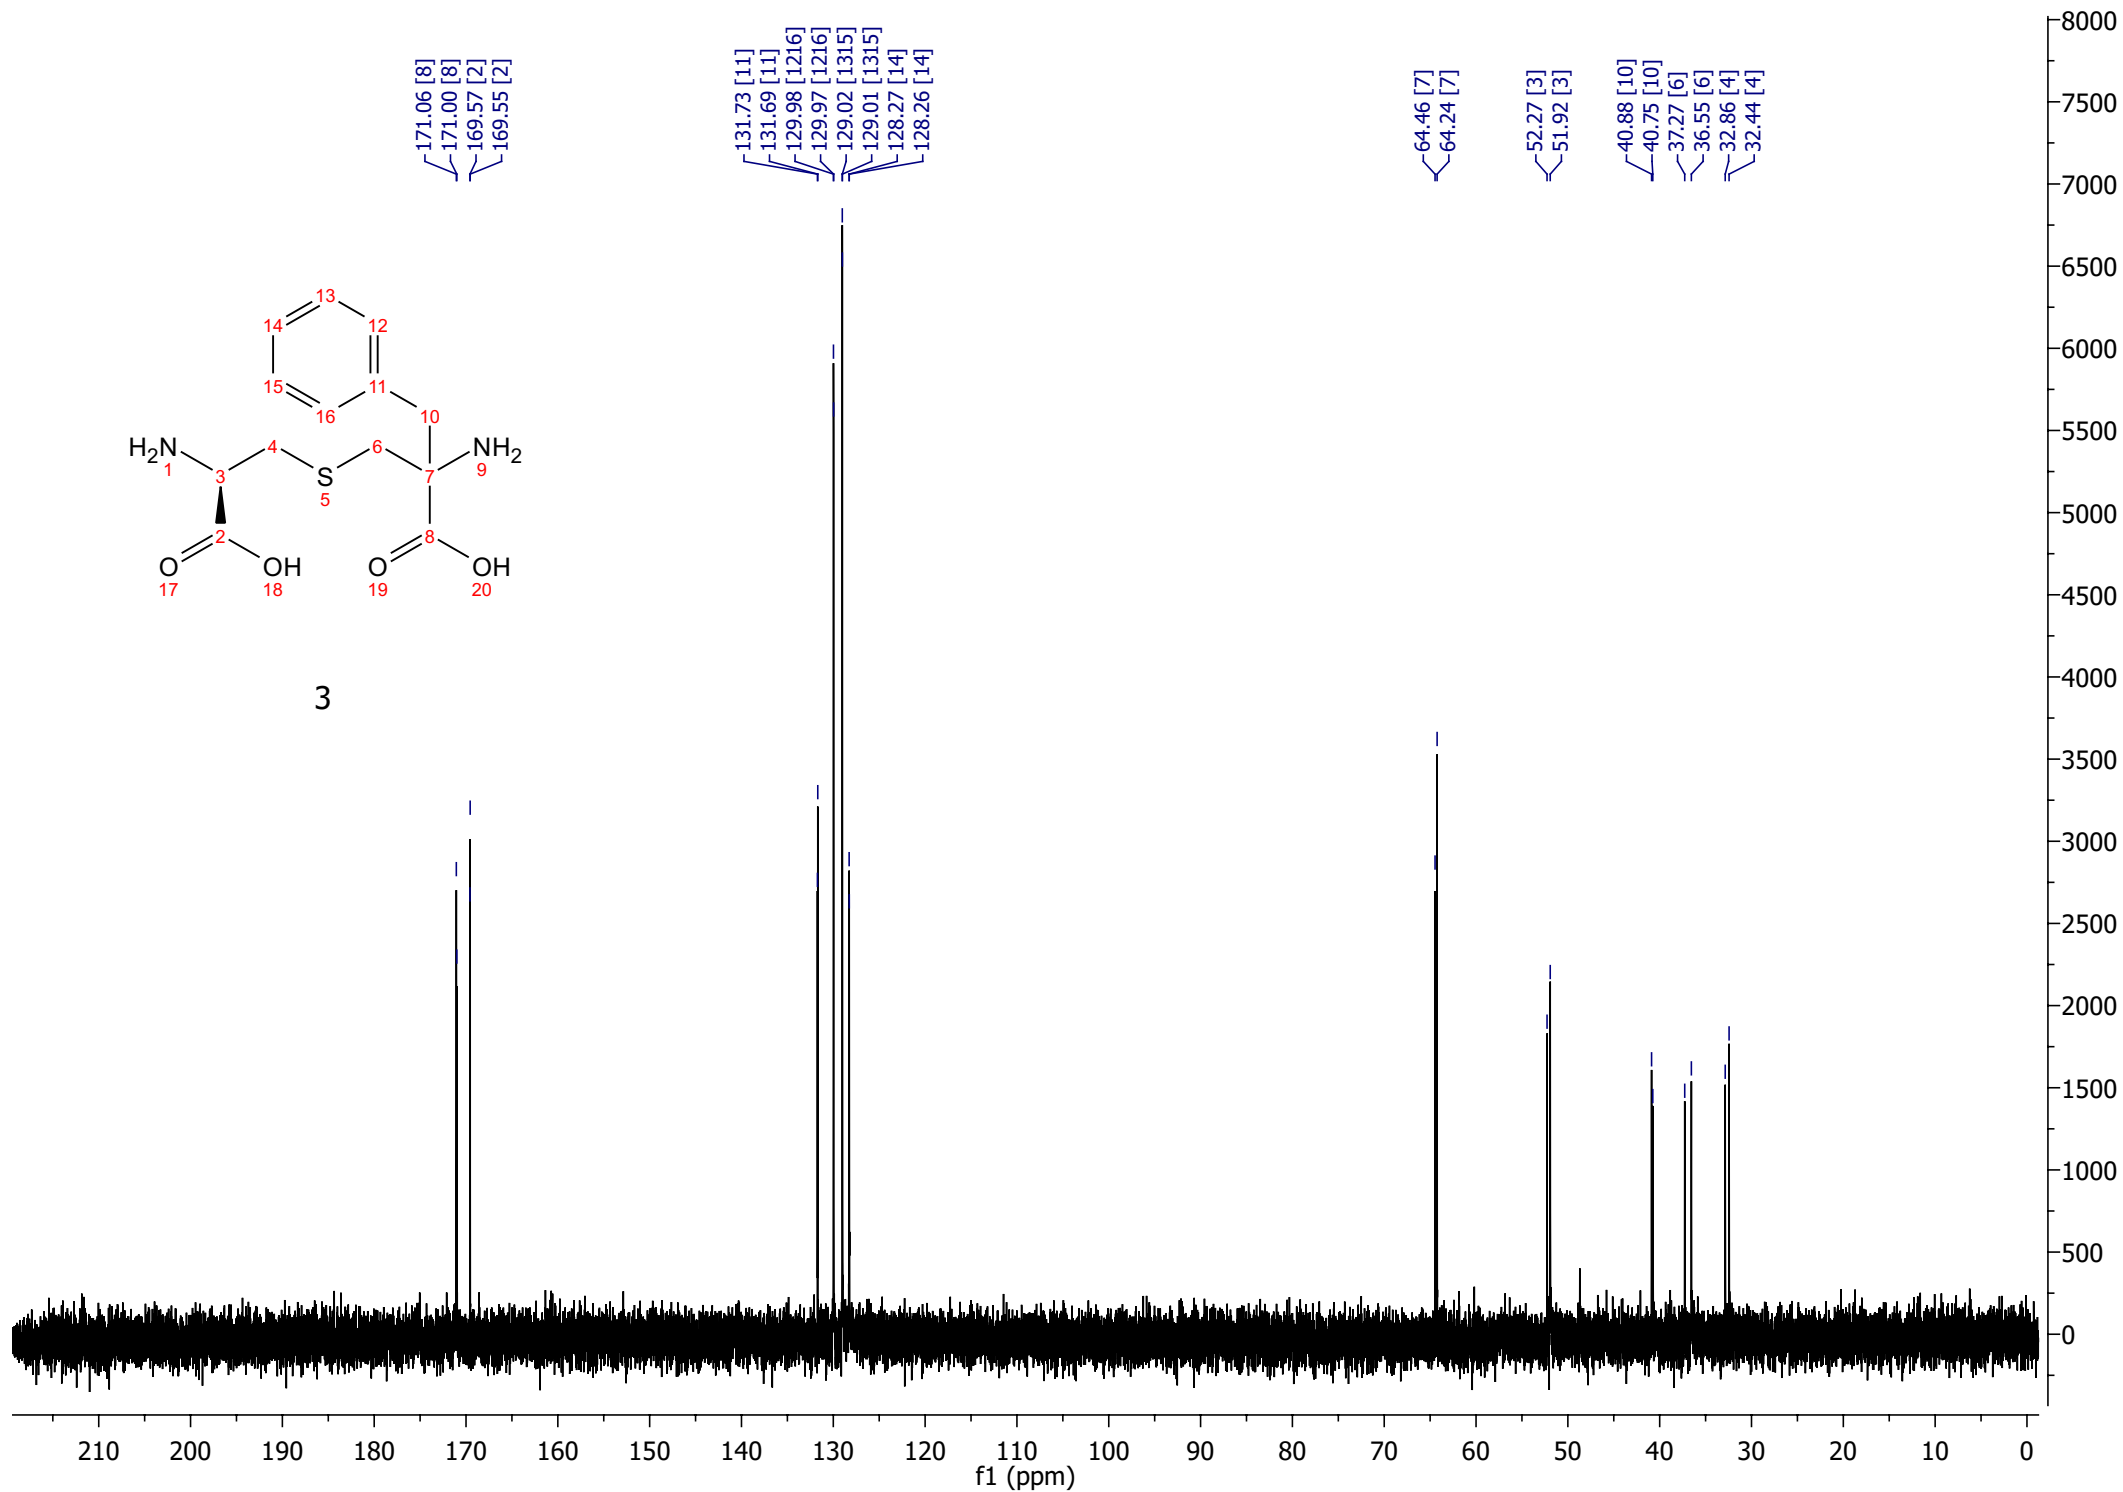

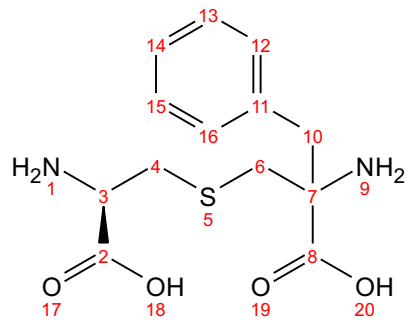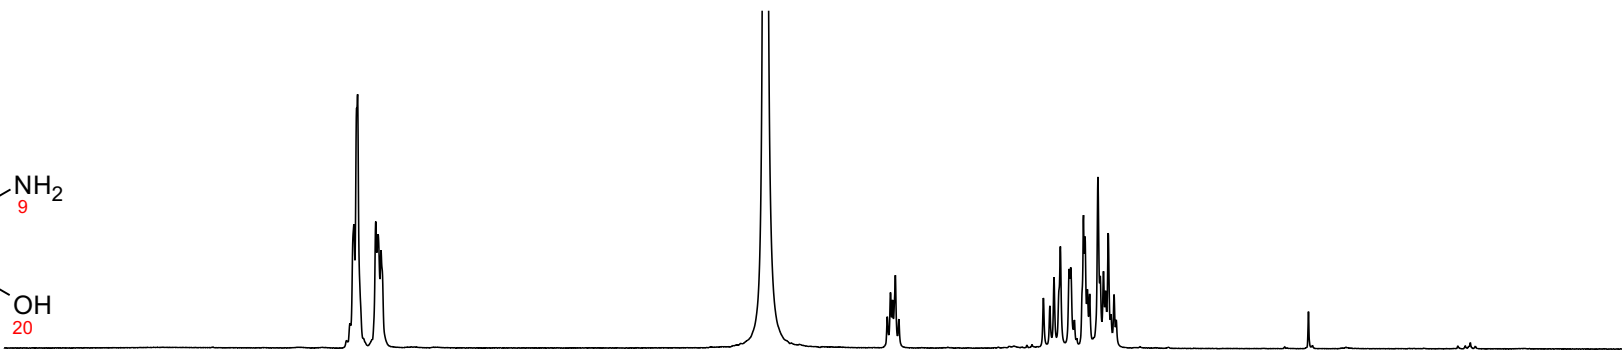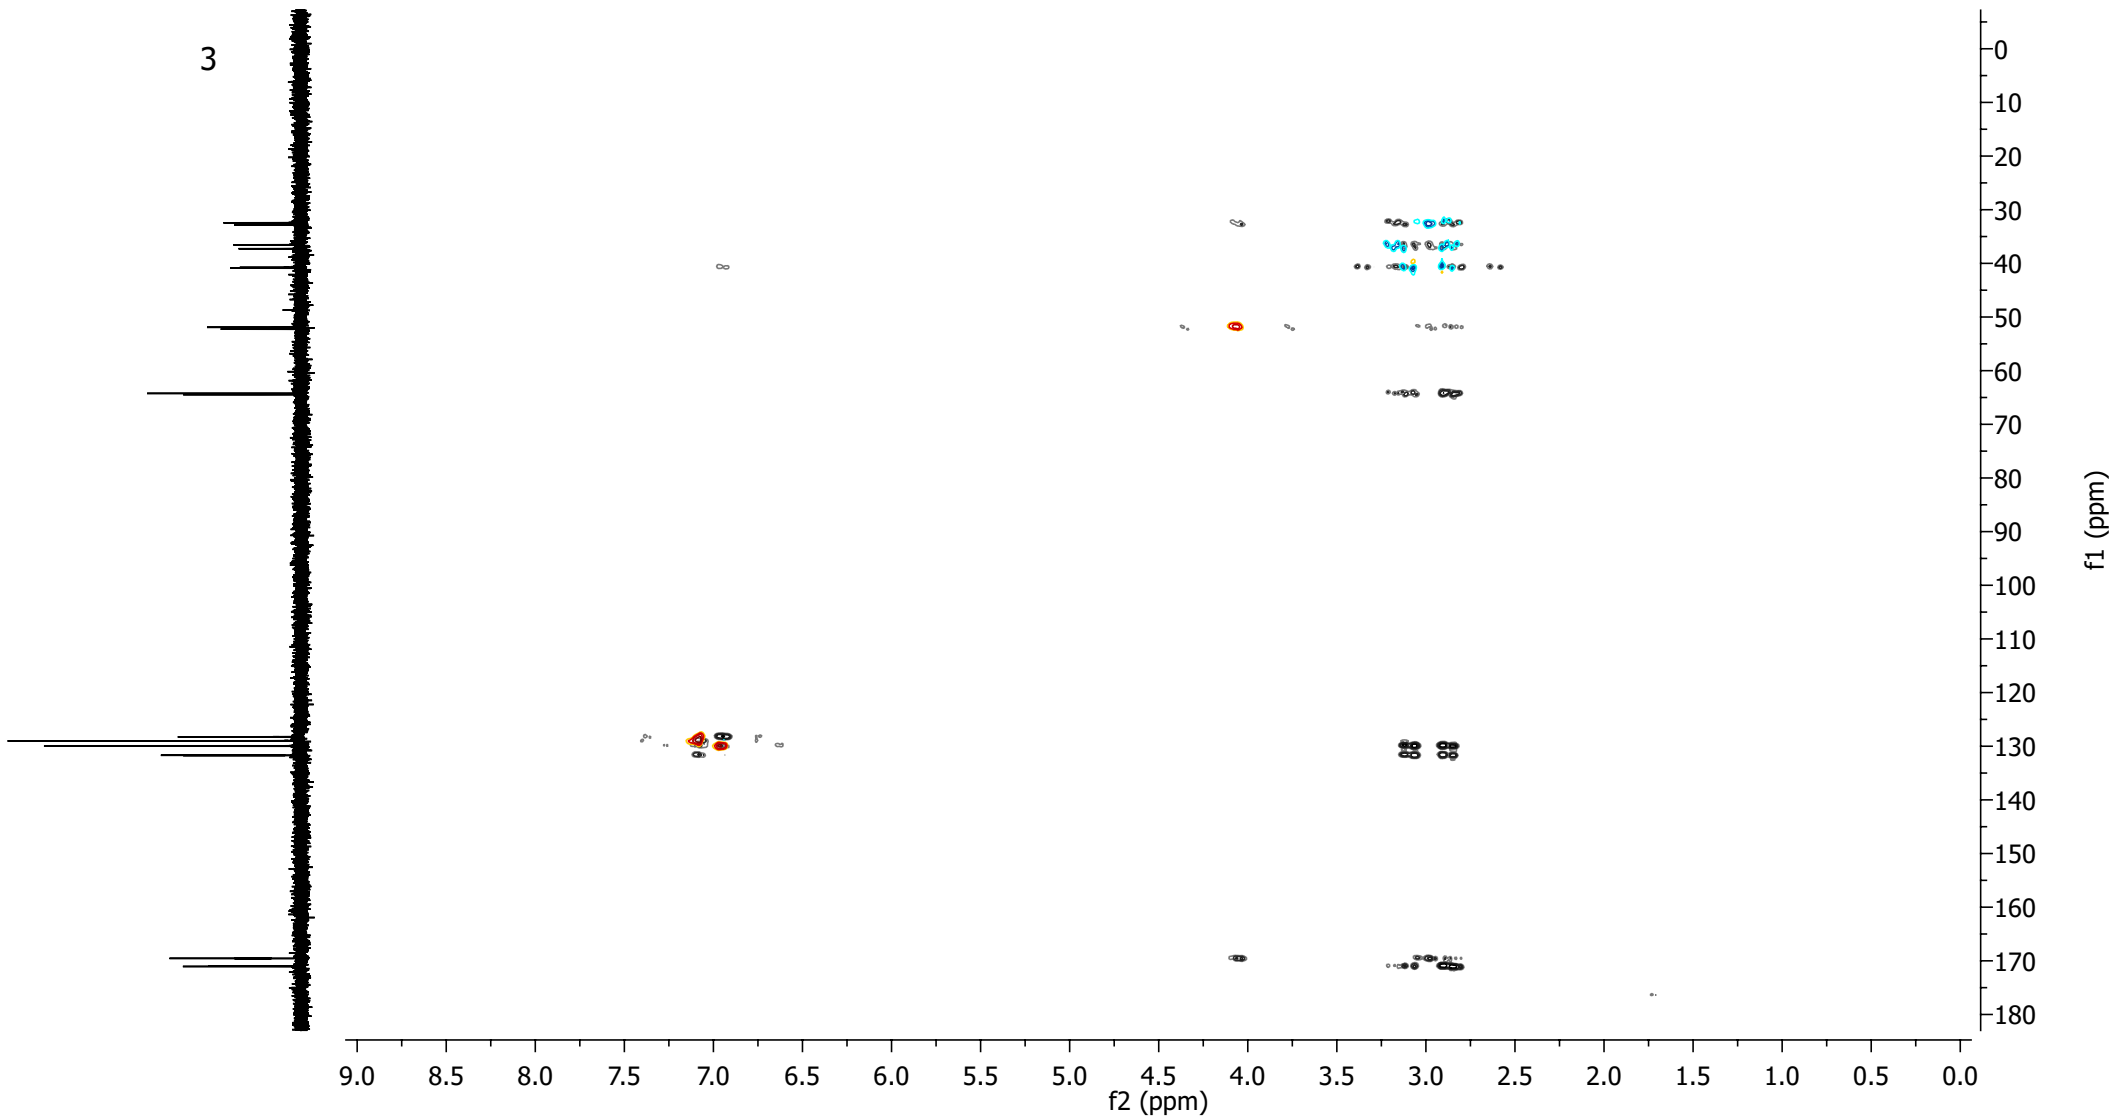

Supplement: mmc1 [file mmc1.pdf]
